# Supplementary material for: Protocol for the Healing After Loss (HeAL) Study: a randomised controlled trial of interpersonal psychotherapy (IPT) for major depression following perinatal loss
Source: PubMed Central journal article supplement — BMJ Open. 2022 Apr 19;12(4):e057747. doi: 10.1136/bmjopen-2021-057747 (PMC9020310; doi:10.1136/bmjopen-2021-057747), 2022-04-19
Supplement: bmjopen-2021-057747.draft_revisions.pdf [file bmjopen-2021-057747.draft_revisions.pdf]

# BMJ Open

BMJ Open is committed to open peer review. As part of this commitment we make the peer review history of every article we publish publicly available.

When an article is published we post the peer reviewers' comments and the authors' responses online. We also post the versions of the paper that were used during peer review. These are the versions that the peer review comments apply to.

The versions of the paper that follow are the versions that were submitted during the peer review process. They are not the versions of record or the final published versions. They should not be cited or distributed as the published version of this manuscript.

BMJ Open is an open access journal and the full, final, typeset and author-corrected version of record of the manuscript is available on our site with no access controls, subscription charges or pay-per-view fees (<http://bmjopen.bmj.com>).

If you have any questions on BMJ Open's open peer review process please email [info.bmjopen@bmj.com](mailto:info.bmjopen@bmj.com)

# BMJ Open

## Study Protocol: Randomized controlled trial of interpersonal psychotherapy (IPT) for major depression following perinatal loss

|                               |                                                                                                                                                                                                                                                                                                                                                                                                                                                                                                                                                                                                                                                                                                                                      |
|-------------------------------|--------------------------------------------------------------------------------------------------------------------------------------------------------------------------------------------------------------------------------------------------------------------------------------------------------------------------------------------------------------------------------------------------------------------------------------------------------------------------------------------------------------------------------------------------------------------------------------------------------------------------------------------------------------------------------------------------------------------------------------|
| Journal:                      | <i>BMJ Open</i>                                                                                                                                                                                                                                                                                                                                                                                                                                                                                                                                                                                                                                                                                                                      |
| Manuscript ID                 | bmjopen-2021-057747                                                                                                                                                                                                                                                                                                                                                                                                                                                                                                                                                                                                                                                                                                                  |
| Article Type:                 | Protocol                                                                                                                                                                                                                                                                                                                                                                                                                                                                                                                                                                                                                                                                                                                             |
| Date Submitted by the Author: | 25-Sep-2021                                                                                                                                                                                                                                                                                                                                                                                                                                                                                                                                                                                                                                                                                                                          |
| Complete List of Authors:     | Johnson, Jennifer; Michigan State University College of Human Medicine, OBGYN<br>Price, Ann B.; Warren Alpert Medical School of Brown University, Department of Psychiatry<br>Sikorskii, Alla; Michigan State University College of Osteopathic Medicine, Department of Psychiatry<br>Key, Kent; Michigan State University College of Human Medicine<br>Taylor, Brandon; Michigan State University College of Human Medicine<br>Lamphere, Susan; Michigan State University College of Human Medicine<br>Huff, Christine; Michigan State University College of Human Medicine<br>Cinader, Morgan; Michigan State University College of Human Medicine<br>Zlotnick, Caron; Butler Hospital; Women and Infants Hospital of Rhode Island |
| Keywords:                     | Depression & mood disorders < PSYCHIATRY, Adult psychiatry < PSYCHIATRY, Maternal medicine < OBSTETRICS                                                                                                                                                                                                                                                                                                                                                                                                                                                                                                                                                                                                                              |
|                               |                                                                                                                                                                                                                                                                                                                                                                                                                                                                                                                                                                                                                                                                                                                                      |

SCHOLARONE™  
Manuscripts

1  
2  
3 Running Head: PERINATAL LOSS  
4  
5

6  
7 Study Protocol: Randomized controlled trial of interpersonal psychotherapy (IPT) for major  
8  
9 depression following perinatal loss  
10  
11  
12

13 Jennifer E. Johnson,\* Michigan State University College of Human Medicine, 200 East 1<sup>st</sup> St, Flint,  
14

15 MI 48503, USA. JJohns@msu.edu  
16  
17

18 Ann B. Price, Department of Psychiatry and Human Behavior, Alpert Medical School of Brown  
19

20 University, 700 Butler Ave, Providence, RI 02906, USA. Ann\_Back\_Price@brown.edu  
21

22 Alla Sikorskii, Michigan State University College of Osteopathic Medicine, Department of  
23

24 Psychiatry, 909 Wilson Rd, East Lansing, MI 48824, USA. Sikorska@msu.edu  
25  
26

27 Kent D. Key, Michigan State University College of Human Medicine, 200 East 1<sup>st</sup> St, Flint, MI  
28

29 48503, USA. KeyKent@msu.edu  
30

31 Brandon Taylor, Michigan State University College of Human Medicine, 200 East 1<sup>st</sup> St, Flint, MI  
32

33 48503, USA. Tay11214@msu.edu  
34

35 Susan Lamphere, Michigan State University College of Human Medicine, 200 East 1<sup>st</sup> St, Flint,  
36

37 MI 48503, USA. Lamphe14@msu.edu  
38  
39

40 Christine Huff, Michigan State University College of Human Medicine, 200 East 1<sup>st</sup> St, Flint, MI  
41

42 48503, USA. HuffChr5@msu.edu  
43  
44

45 Morgan Cinader, Michigan State University College of Human Medicine, 200 East 1<sup>st</sup> St, Flint,  
46

47 MI 48503, USA. CinaderM@msu.edu  
48  
49

50 Caron Zlotnick, Butler Hospital and Women and Infants Hospital, 345 Blackstone Blvd,  
51

52 Providence, RI 02906, USA. University of Cape Town, Cape Town, South Africa.  
53

54 Caron\_Zlotnick@brown.edu  
55

56 \*Corresponding Author  
57  
58  
59  
60

## Abstract

**Introduction.** This protocol describes a study testing the efficacy of interpersonal psychotherapy (IPT) for major depressive disorder following perinatal loss (early and late fetal death and early neonatal death). Perinatal loss is associated with elevated risk of major depressive disorder and posttraumatic stress disorder (PTSD). Perinatal loss conveys specific treatment needs. The trial will be the first fully-powered randomized trial of treatment for any psychiatric disorder following perinatal loss.

**Methods and analysis.** A sample of 274 women in Flint and Detroit areas in Michigan who experience a major depressive episode following a perinatal loss will be randomized to group IPT for perinatal loss or to group Coping with Depression (CWD). We anticipate that 50% of the sample will have co-occurring PTSD. Assessments occur at baseline, mid-treatment (8 weeks), post-treatment (16 weeks), and follow-up (28 weeks). Clinical outcomes include time to recovery from major depressive episode (primary), depressive symptoms, PTSD symptoms, and time to recovery from PTSD. Additional outcomes include social support, social role functioning (including parental functioning for those with living children), well-being, grief (including complicated grief and fault beliefs), and fear of subsequent pregnancies. Social support and grief are hypothesized mediators of the effects of IPT on time to recovery from major depressive episode.

**Ethics and dissemination.** The trial has Institutional Review Board approval, has a Data and Safety Monitoring Board, and has been submitted for voluntary Community Ethics Review Board review. Written operating procedures outline methods for protecting confidentiality, monitoring and recording adverse events, and safeguarding participants. In addition to dissemination to research and clinical communities, we will share results with community organizations through which we recruited, and will offer to share final study results with study participants. De-identified

1  
2  
3 datasets will be available through the National Institute of Mental Health Data Archive and to  
4  
5 qualified investigators upon request.  
6  
7  
8  
9

10 **Clinical trials registration.** The trial was registered at [clinicaltrials.gov](https://clinicaltrials.gov) (NCT04629599).  
11

12 **Key words:** Miscarriage, stillbirth, fetal death, perinatal death, major depressive disorder,  
13  
14 posttraumatic stress disorder, interpersonal psychotherapy.  
15  
16

17 **Word count:** 4,000  
18  
19  
20  
21

### 22 **Article Summary: Strengths and limitations of this study**

23

- 24 • This study addresses a clinical need, and will provide an evidence base for treating a  
25 vulnerable and understudied population whose distress has historically been minimized.  
26  
27
- 28 • The trial will have strong representation from disparities populations (African American  
29 women and socioeconomically disadvantaged women) who experience higher rates of  
30 perinatal loss, increasing its significance.  
31  
32
- 33 • Rigor and reproducibility are ensured by the randomized design, clear inclusion criteria,  
34 use of well-established research, recruitment, and retention methods, and transparent  
35 power and statistical analyses.  
36  
37
- 38 • Assessment strengths include the use of reliable and valid measures, the use of raters  
39 blinded to treatment condition at follow-up, and strong interrater reliability training and  
40 monitoring.  
41  
42
- 43 • Intervention strengths include clearly distinct treatment conditions, use of manualized  
44 treatment protocols and fidelity assessments, and team members with decades of  
45 experience responding to perinatal loss.  
46  
47  
48  
49  
50  
51  
52  
53  
54  
55  
56  
57  
58  
59  
60

## Introduction

1  
2  
3  
4  
5  
6  
7  
8  
9  
10  
11  
12  
13  
14  
15  
16  
17  
18  
19  
20  
21  
22  
23  
24  
25  
26  
27  
28  
29  
30  
31  
32  
33  
34  
35  
36  
37  
38  
39  
40  
41  
42  
43  
44  
45  
46  
47  
48  
49  
50  
51  
52  
53  
54  
55  
56  
57  
58  
59  
60

About 650,000 women in the United States experience perinatal loss each year (including early and late fetal death and the death of a liveborn neonate within the first 28 days).<sup>1 2</sup> Rates of major depressive disorder (MDD) after perinatal loss are higher than after giving birth to a living infant, and are 3 times the rates among matched samples of community women.<sup>3-20</sup> Rates of posttraumatic stress disorder (PTSD) after perinatal loss are up to 7 times the rates of PTSD among mothers of living infants,<sup>13</sup> and elevated PTSD symptoms can occur for years after the loss.<sup>21</sup> Fetal or neonatal death triples rates of suicide and of hospitalization for suicide attempts.<sup>22 23</sup>

Not only do women with perinatal loss have higher rates of MDD and PTSD than mothers of living infants, their needs also differ from needs following many other kinds of bereavement. In perinatal loss, the fact of bereavement is compounded by the physical experience of miscarriage or of delivering a baby that has already died.<sup>24</sup> PTSD rates (25% overall and 66% for women with MDD) are higher after perinatal loss than after most other kinds of bereavement.<sup>24</sup> Many women experiencing perinatal loss grieve in secret, as others may not know about the loss. Even if others do know, there are few social norms that guide how others can or should support the bereaved, making support less likely and often less helpful (e.g., “you can just have another one”).<sup>12 25</sup> They are sometimes considered “illegitimate mourners.”<sup>12 26-28</sup> Reasons for loss are often unclear and many women blame themselves.

Despite recognition that MDD (with or without co-occurring PTSD) following perinatal loss causes significant impairment and that treatment as usual is often inadequate,<sup>29-33</sup> our previous pilot work<sup>34</sup> created and tested the first manual for treating any psychiatric disorder after perinatal loss. The manual is structured and applies interpersonal psychotherapy (IPT) principles to perinatal loss in a group format. Previous IPT and other treatment manuals for perinatal depression<sup>35-38</sup> focus

1  
2  
3 on helping women adjust their relationships, identity, roles, and routines to the demands of a new  
4 baby. This is inappropriate in the context of perinatal loss. Our manual applies IPT social support  
5 and communication principles to issues such as resolving conflicts over how to respond to the loss,  
6  
7  
8  
9  
10  
11  
12  
13  
14  
15  
16  
17  
18  
19  
20  
21  
22  
23  
24  
25  
26  
27  
28  
29  
30  
31  
32  
33  
34  
35  
36  
37  
38  
39  
40  
41  
42  
43  
44  
45  
46  
47  
48  
49  
50  
51  
52  
53  
54  
55  
56  
57  
58  
59  
60

on helping women adjust their relationships, identity, roles, and routines to the demands of a new baby. This is inappropriate in the context of perinatal loss. Our manual applies IPT social support and communication principles to issues such as resolving conflicts over how to respond to the loss, grieving and requesting support in the absence of social norms about how to do so, and resolving questions of fault and role competence. It can be used by providers who do not know IPT. A randomized pilot study found results favoring the new IPT manual for PTSD recovery, treatment satisfaction, depressive symptoms, grief, and social support relative to Coping with Depression (CWD), a cognitive-behavioral based intervention that does not focus on perinatal loss, interpersonal issues, or social support.<sup>34</sup>

Based on those promising results, the current study will be the first fully-powered randomized trial of treatment for any psychiatric disorder following perinatal loss. We will compare our group IPT manual to a standard group depression treatment (CWD) in a sample of 274 women experiencing MDD in the context of perinatal loss. The trial will test the hypotheses that:

1. IPT for perinatal loss will result in reduced time to recovery from MDD (primary), depressive symptoms, and PTSD symptoms, relative to CWD. Among women meeting criteria for PTSD, IPT will result in reduced time to recovery from PTSD relative to CWD.
2. IPT for perinatal loss will result in increased social support, social role functioning (including parental functioning for women with living children), and well-being, and decreased grief and fear of subsequent pregnancies, relative to CWD.
3. Social support and grief will mediate the effects of IPT on time to MDD recovery.

This trial will provide an evidence base for treating a vulnerable and understudied population whose distress has historically been minimized. Given that poverty increases risk of perinatal

1  
2  
3 loss,<sup>39-41</sup> and doubles the risk of perinatal depression,<sup>42-50</sup> and that rates of perinatal loss for  
4 African-American women are double those for white women,<sup>51-53</sup> the location of the trial in  
5 Southeast Michigan, which includes Flint and Detroit (minority-majority cities with high rates of  
6 poverty), increases the trial's significance.  
7  
8  
9  
10

## 11 **Methods and analysis**

### 12 **Rationale for design**

13  
14  
15  
16  
17 Given that no other treatment exists for women who experience perinatal-loss related MDD  
18 that could be used as a comparator condition, we chose to use a general depression treatment, the  
19 Coping With Depression (CWD) course, as a control condition. We chose CWD over other  
20 standard depression treatments because it is the group treatment with the most empirical support  
21 for treating MDD<sup>54 55</sup> and because it is distinct from IPT. IPT addresses MDD through emotional  
22 exploration, work on relationships, communication, grief, and social support. CWD addresses  
23 MDD by changing thinking and behavior; it focuses on skills for reducing depression in general  
24 and does not have perinatal-loss specific components. Our IPT treatment differs from CWD in its  
25 focus on exploring reactions to the loss, addressing loss-related interpersonal challenges, and  
26 improving loss-related social support and grief-specific coping. The trial's secondary outcomes  
27 (social support, social functioning, grief) assess hypothesized differences between treatments. As  
28 desired, our pilot study found differences between conditions in the hypothesized mechanisms of  
29 social support and grief and in terms of in-session activities.<sup>34</sup>  
30  
31  
32  
33  
34  
35  
36  
37  
38  
39  
40  
41  
42  
43  
44  
45  
46

### 47 **Treatments**

48  
49 Manualized treatments are attention-matched (12 90-minute groups, 1 individual pre-group  
50 session, and 1 booster session). Both treatments allow new women to enter the group every 4  
51 weeks of the 12-week group.  
52  
53  
54  
55  
56  
57  
58  
59  
60



1  
2  
3       **Interpersonal psychotherapy (IPT).** Participants in the IPT condition receive 12 group  
4 sessions and 2 individual (pre-group and 1-month booster) sessions as outlined in the structured  
5 manual (see Table 1). The individual sessions prepare patients to use the group effectively, to  
6 keep group members focused on their treatment goals, and to maintain treatment gains. In addition,  
7 3 of the 12 group sessions invite women to include their partners or other support people to bolster  
8 the woman's social support system and to reduce conflicts over how to react to the loss.  
9 Relationship distress is common following perinatal loss.<sup>12 56</sup>

10  
11       Group sessions are semi-structured, and each woman covers the four group topics listed in  
12 Table 1 three times, approaching each topic from a different stage in the mourning process. We  
13 found that entering new women into the groups every four weeks allows remaining women to see  
14 their own progress and encourages new women through example and peer counseling.

15  
16       **Coping with Depression (CWD).** CWD is a structured, manualized<sup>57</sup> psycho-educational  
17 group treatment for MDD. The CWD course is cognitive-behavioral. The problems shown by  
18 depressed individuals are viewed as behavioral, with cognitive patterns that can be unlearned or  
19 relearned. Its effectiveness is comparable to other forms of psychotherapy in depression.<sup>55</sup> The  
20 course content teaches skills including relaxation, cognitive skills, and behavioral activation. The  
21 CWD pre-group and booster sessions are the pre-group and booster sessions from the published  
22 CWD manual<sup>57</sup>. To ensure that the CWD intervention was distinct from IPT, we excluded the 2  
23 sessions on social skills and emphasized pleasant activities that were individual rather than social.  
24 Consistent with standard CWD, we focused on addressing depression rather than discussing grief  
25 or perinatal loss. We expanded other CWD material (e.g., relaxation practice) to replace sessions  
26 on social skills. In our studies, the 12 CWD sessions covered: an introduction to social learning  
27 rationale of depression; learning to relax; relaxation in everyday situations; pleasant activities and  
28  
29  
30  
31  
32  
33  
34  
35  
36  
37  
38  
39  
40  
41  
42  
43  
44  
45  
46  
47  
48  
49  
50  
51  
52  
53  
54  
55  
56  
57  
58  
59  
60

1  
2  
3 depression; formulating a pleasant activities plan; constructive thinking; planning for constructive  
4 thinking; and maintaining gains.  
5  
6

## 7 **Participants**

8  
9  
10 Participants will be 274 women who are experiencing MDD in the context of perinatal loss  
11 who (1) meet DSM-5<sup>58</sup> criteria for MDD; (2) have experienced a perinatal loss (including early  
12 and late fetal death, death of a liveborn neonate within the first 28 days, and medically  
13 recommended termination) within the last 1-12 months; (3) are 18 to 50 years old; (4) speak and  
14 understand English well enough to understand questionnaires when they are read aloud; (5) can  
15 provide the name and contact information of at least two locator persons; and (6) have access to a  
16 telephone. Exclusion criteria are: (1) onset of *current* major depressive episode prior to news of  
17 difficulties with the pregnancy or health risk to the infant (women with prior episodes are included);  
18 (3) current or past diagnosis of bipolar disorder, schizophrenia or other psychotic disorder; (4)  
19 primary diagnosis of current substance use disorder; (5) acute suicidal or homicidal risk; (6)  
20 beginning or changing dose of antidepressant medication or psychotherapy in the previous 12  
21 weeks); (7) any IPT or cognitive-behavioral treatment in the previous 12 weeks. Women in stable  
22 concurrent psychotherapy who are included are asked to suspend this treatment during the active  
23 study treatment phase. PTSD is not an inclusion criterion for the study. However, based on our  
24 pilot,<sup>34</sup> we anticipate that slightly more than half the sample will meet criteria for PTSD at study  
25 enrollment.  
26  
27  
28  
29  
30  
31  
32  
33  
34  
35  
36  
37  
38  
39  
40  
41  
42  
43  
44  
45

## 46 **Therapist training and supervision**

47  
48  
49 We trained 8 study therapists (4 in IPT and 4 in CWD) who are MSWs or clinical or  
50 counseling psychologists. Therapists are recruited from their respective communities to moonlight  
51 as clinicians in this proposed study. Therapists are provided with the detailed treatment manuals.  
52  
53  
54  
55  
56  
57  
58  
59  
60

1  
2  
3 Training for both conditions includes education and role plays. Therapists in both conditions will  
4  
5 be monitored for adherence/competence throughout the study and retrained as needed.  
6

7  
8 Supervision involves review of therapists' audiotaped sessions and a weekly one-hour  
9  
10 small-group telephone meeting for feedback and case discussion. Treatment sessions are audio  
11  
12 recorded using digital audio recorders or a HIPAA-compliant version of Zoom. Study therapists  
13  
14 remotely upload the recordings to the study's secure research server, where the supervisors can  
15  
16 access the recordings to listen to them (remotely).  
17  
18

### 19 **Randomization**

20  
21 Women are randomly assigned to IPT or CWD in a 1:1 ratio. We stratify randomization  
22  
23 on whether women (1) have been taking antidepressant medications or attending other  
24  
25 psychotherapy (stability of dose is an inclusion criterion); and (2) have experienced each type of  
26  
27 perinatal loss (miscarriage, stillbirth, early neonatal death). Randomization sequences were  
28  
29 created by the study statistician. Assignment is concealed in an envelope that research assistants  
30  
31 open at the time of randomization.  
32  
33

### 34 **Recruitment**

35  
36  
37 Participants are recruited from counties in Southeast Michigan using a broad outreach  
38  
39 strategy. We are partnering with regional health systems, community-based organizations in Flint  
40  
41 and Detroit, and a regional Medicaid system to assist with study recruitment. Recruitment also  
42  
43 includes flyers and referrals from: (1) local birthing centers, emergency departments, OBGYN  
44  
45 offices, and federally qualified health centers; (2) hotlines, support groups, family nurse  
46  
47 partnerships; (3) funeral homes, (4) churches, daycare centers, other places where women and  
48  
49 mothers congregate (WIC offices, Medicaid offices, etc.), (5) bus ads, and (6) online venues.  
50  
51  
52

### 53 **Research sites**

1  
2  
3 The study team is embedded in Flint and Detroit. We had planned to offer baseline  
4 assessments at women's homes or our offices, group sessions in community locations convenient  
5 for participants, and to conduct follow-up assessments by telephone. However, due to the COVID-  
6  
7  
8  
9  
10  
11  
12  
13  
14  
15  
16  
17  
18  
19  
20  
21  
22  
23  
24  
25  
26  
27  
28  
29  
30  
31  
32  
33  
34  
35  
36  
37  
38  
39  
40  
41  
42  
43  
44  
45  
46  
47  
48  
49  
50  
51  
52  
53  
54  
55  
56  
57  
58  
59  
60

The study team is embedded in Flint and Detroit. We had planned to offer baseline assessments at women's homes or our offices, group sessions in community locations convenient for participants, and to conduct follow-up assessments by telephone. However, due to the COVID-19 pandemic, we are currently conducting all assessments and treatment sessions by Zoom, with an option to switch to holding groups in person in the future.

### Retention

We employ techniques we have found helpful in achieving low attrition rates in previous studies.<sup>59-65</sup> These include study staff's strong relationships with participants, efforts to value and appreciate the women's participation in the study, and frequent personal contact. We are flexible about follow-up appointment scheduling and train research staff to be culturally sensitive. Follow-up assessments take place by Zoom or phone, with well-established safety procedures for emergencies.<sup>65</sup> We maintain a list of two other people who know where the participant resides. A cellular phone is used to contact women who have blocked calls. We conduct treatment groups at different times and locations to make attendance easier. If a woman misses a treatment appointment, the therapist calls her to check in and help problem-solve barriers to attendance. Finally, participant fees for follow-up assessments helps facilitate retention.

### Assessments

Assessments take place at baseline, mid-treatment (8 weeks), post-treatment (16 weeks), and follow-up (28 weeks; see Table 2). Assessments are conducted by research assistants (RAs) trained in interviewer administered instruments and blind to treatment assignment. RAs are certified interviewer-rated instruments prior to beginning interviews. Interviewers and senior staff meet regularly to review assessment tapes, address questions, and monitor inter-rater reliability. Data quality is maintained through clerical and clinical checks after data are entered and through

1  
2  
3 regular examination of distributions, missing data, and outliers.  
4

5         **Diagnosis/screening.** The Structured Clinical Interview for DSM-5 (SCID-5)<sup>66</sup> is used to  
6 establish study eligibility. During follow-up, the Longitudinal Interval Follow-up Examination  
7 (LIFE),<sup>67 68</sup> a standardized retrospective calendar-based interview, is used to assess MDD and  
8 PTSD recovery. The LIFE uses Psychiatric Status Ratings (PSRs) to measure severity of DSM-5  
9 symptoms on a scale of 1 (asymptomatic) to 6 (incapacitated) for each week. Recovery is defined  
10 as 8 consecutive weeks of a PSR of 1-2.<sup>69</sup> The LIFE is the gold-standard way of determining onset  
11 and offset of psychiatric disorder.<sup>68 70-73</sup> We also use the LIFE to track participation in  
12 psychotherapeutic and psychopharmacologic treatment at baseline and follow-up. We assess  
13 partner violence using the Women's Experience with Battering screen.<sup>74</sup> Battered women (scores  
14 of 20+) are included in the study and provided with partner violence resources.  
15  
16  
17  
18  
19  
20  
21  
22  
23  
24  
25  
26  
27

28         **Depression severity** is assessed using the Quick Inventory of Depressive Symptoms  
29 (QIDS), Self-Report version.<sup>75</sup>  
30  
31  
32

33         **PTSD symptom severity** is assessed using the Life Events Checklist and PTSD Checklist  
34 for DSM-5 (LEC-PCL).<sup>76-79</sup> We also assess whether PTSD symptoms are related to the perinatal  
35 loss.  
36  
37  
38  
39

40         **Social support and social functioning.** We use the 12-item Multidimensional Scale for  
41 Perceived Social Support (MSPSS)<sup>80</sup> to assess overall social support. We use a validated  
42 adaptation of the Relationship Assessment Scale<sup>81</sup> to assess satisfaction with an important  
43 significant other (partner or other support person of the woman's choosing) relationship. We assess  
44 social functioning using the Short version of the Social Adjustment Scale – Self-Report (SAS-  
45 SR).<sup>82</sup> Because depression can affect parenting, we will analyze the SAS-SR total score as well as  
46 its parental functioning subscale.  
47  
48  
49  
50  
51  
52  
53  
54  
55  
56  
57  
58  
59  
60

1  
2  
3       **Well-being** (including life satisfaction, purpose and meaning) is measured by using the 23-  
4 item Neuro-QoL scale for positive affect and well-being.<sup>83</sup>  
5  
6

7       **Grief** symptoms are measured using the Perinatal Bereavement Grief Scale (PBGS).<sup>4 84</sup>  
8 Complicated grief is measured using the Inventory of Complicated Grief (ICG).<sup>85</sup> A few items on  
9 the ICG were reworded to refer to perinatal loss. Given that many women present with unwarranted  
10 beliefs about what caused the loss, we assess deservingness and guilt as grief outcomes using a 7-  
11 item scale about loss beliefs (the Loss Beliefs Scale). This scale includes items such as “I think  
12 what happened was my fault” and “The miscarriage, stillbirth, or baby’s death was caused by  
13 something about me.” This perinatal loss specific scale was created after reviewing the literature  
14 on beliefs about deserved bad outcomes (e.g.,<sup>86-88</sup>).  
15  
16  
17  
18  
19  
20  
21  
22  
23  
24  
25

26       **Fear of subsequent pregnancies** is assessed by 7-point Likert items (from 1 = Strongly  
27 Disagree” to 7 = “Strongly Agree”): (1) “I am afraid to become pregnant again”; (2) “I look  
28 forward to becoming pregnant again”; (3) “I plan to become pregnant again”; (4) “I worry about  
29 what might happen if I get pregnant again,” (5) “I do not want to be pregnant again.”  
30  
31  
32  
33  
34

35       **Treatment acceptability** is measured using the Client Satisfaction Questionnaire-Revised  
36 (CSQ-8-R).<sup>89 90</sup>  
37  
38  
39

40       **Treatment integrity.** We will use the IPT and CWD adherence and competence scales  
41 developed in the pilot trial<sup>34</sup> to rate fidelity using audio recordings. As in the pilot trial, raters will  
42 also assess the percent of time in each group session spent discussing the perinatal loss and  
43 discussing loss-related communication strategies.<sup>34</sup>  
44  
45  
46  
47  
48

## 49 **Analysis**

50  
51       Primary analyses will be intent-to-treat. We will examine dose-response effects in  
52 secondary analyses. Primary tests will be two-sided with  $p=0.05$ . Descriptive statistics will include  
53  
54  
55  
56  
57  
58  
59  
60

1  
2  
3 effect sizes and measures of clinical significance.<sup>91</sup> Primary and secondary outcomes and all  
4 hypotheses are stated a priori, therefore 0.05 level of significance will be used. Per Kraemer,<sup>92</sup> we  
5 will not test for differences between conditions due to randomization as those differences are due  
6 to chance alone, rendering p-values meaningless. Covariates for analyses are specified a priori  
7 based on subject matter expertise. No interim analyses are planned.

8  
9  
10  
11  
12  
13  
14  
15 **Attrition analysis and missing data.** We will compare characteristics of those who drop  
16 out by trial arm and compare those who complete the study with those who did not to inform the  
17 generalizability of findings. For the primary outcome of time to MDD recovery, unobserved time  
18 to MDD resolution for the drop-outs will be treated as censored. For secondary outcomes, the  
19 regression techniques below allow for missing at random (MAR) mechanism.<sup>93</sup> If patterns of  
20 missing data indicate potential not missing at random (NMAR) mechanisms, then models  
21 describing missing mechanisms will be considered (e.g., pattern-mixture models),<sup>94 95</sup> and  
22 sensitivity analyses will be employed to investigate robustness of the results.

23  
24  
25  
26  
27  
28  
29  
30  
31  
32  
33 **General approaches.** For survival analyses, the proportional hazard (PH) assumption will  
34 be evaluated. If it holds, then survival analyses will use Cox regression. If not, time-varying  
35 effects will be investigated, and the model will be modified to include an interaction of relevant  
36 covariates with a function of time variable. Stratified models will also be considered.

37  
38  
39  
40  
41  
42  
43  
44  
45  
46  
47  
48  
49  
50  
51  
52  
53  
54  
55  
56  
57  
58  
59  
60  
Linear mixed effects (LME) models will be used to test differences between trial arms for  
continuous outcomes. All participants with at least one completed post-baseline assessment will  
be included. We expect these scores to follow normal distributions. However, generalized linear  
mixed effects (GLME) modeling will be used if outcome is not normally distributed and cannot  
be normalized using transformations.

**Aim 1.** (1) Using survival analysis, with initial QIDS score as a covariate, we will test the

1  
2  
3 hypothesis that IPT, relative to CWD, will result in reduced time to recovery from the major  
4 depressive episode (primary). (2) Using LME or GLME with baseline QIDS score as a covariate,  
5  
6 we will test the hypothesis that IPT, relative to CWD, will result in reduced depressive symptoms  
7  
8 (QIDS scores) across post-baseline assessments. (3) Using LME or GLME with baseline PCL  
9  
10 score as a covariate, we will test the hypothesis that IPT, relative to CWD, will result in reduced  
11  
12 PTSD symptoms (PCL score) across post-baseline assessments. (4) Using survival analysis, with  
13  
14 initial PCL score as a covariate, we will test the hypothesis that IPT, relative to CWD, will result  
15  
16 in reduced time to recovery from PTSD.  
17  
18  
19  
20

21 **Aim 2.** Using baseline scores as covariates, we will separately test the hypotheses that  
22  
23 IPT for perinatal loss will result in increased social support, social role functioning, and well-  
24  
25 being, and decreased grief and fear of subsequent pregnancies, relative to CWD, using the LME  
26  
27 or GLME modeling described above. Specifically, controlling for baseline values, we will use  
28  
29 separate analyses to test the effects of IPT vs. CWD on MSPSS, Relationship Assessment Scale,  
30  
31 SAS-SR total, SAS-SR parenting subscale, Neuro-QoL, Perinatal Bereavement Grief Scale,  
32  
33 Inventory of Complicated Grief, Loss Belief Scale, and Fear of Subsequent Pregnancy scores. We  
34  
35 will also compare conditions on CSQ-8-R Treatment Acceptability.  
36  
37  
38  
39

40 **Aim 3.** We will test the hypotheses that social support (MSPSS scores) and grief (PBGS  
41  
42 scores) will mediate the effects of IPT on time to MDD recovery. To test for mediation, trial arm  
43  
44 will be treated as the independent variable and each potential mediator (one at a time) will be tested  
45  
46 for their effect on the outcome variable at weeks 8, 16, and 28, with the baseline value of that  
47  
48 outcome treated as a covariate. We will use a bias corrected bootstrapping analytic strategy<sup>96 97</sup>  
49  
50 based on 5000 bootstrap samples to estimate confidence intervals (CIs) around the indirect effect  
51  
52 of study group on the outcome variable, through the mediator.  
53  
54  
55  
56  
57  
58  
59  
60



1  
2  
3 **Moderators.** We will calculate differential effect estimates and test the interactions  
4  
5 between several participant characteristics and the intervention effect in predicting time to  
6  
7 recovery from MDD. Characteristics to be examined include race, ethnicity, having living children,  
8  
9 type of perinatal loss, stable use of other antidepressant or psychosocial treatment at baseline,  
10  
11 having PTSD at baseline, having a partner, number of past depressive episodes, and time since  
12  
13 loss. Given our emphasis on meeting the needs of minority women, we will also evaluate whether  
14  
15 mediation relationships or intervention effects on secondary outcomes differ by race.  
16  
17

### 18 19 **Sample size**

20  
21 **Recovery outcomes.** For the primary outcome of time to MDD recovery (censored at 28  
22  
23 weeks), assuming 1:1 allocation, power 0.80, two-sided tests at 0.05 level of significance, and  
24  
25 observed estimated hazard ratio=1.79, the required number of events is 94 (number of MDEs  
26  
27 resolved). By week 28, there were 17 events in the preliminary data (17 women had MDD resolved,  
28  
29 11 in the IPT condition, and 6 in the CWD condition) out of 45 participants, so the rate of events  
30  
31 was .38. Thus to have 94 events, total N=246 is required. Given that we obtained at least one  
32  
33 follow-up assessment on 90% of participants in the pilot trial,<sup>34</sup> we increased the sample size to  
34  
35 274. Given the observed hazard ratio of 5.85 for PTSD in the pilot trial, power for PTSD recovery  
36  
37 should be greater than 80%. Tests of mediation in Aim 3 will have greater power than the primary  
38  
39 outcome because of reduction in error variance when controlling for the mediator.  
40  
41  
42  
43

44 Continuous (secondary) outcomes. Assuming an unadjusted  $d = .32$  and a correlation of  
45  
46 0.6 between follow-up measures and 0.3 with baseline (as observed in the preliminary data), the  
47  
48 adjusted effect size would be 0.40, and only  $n = 200$  participants would be needed before attrition.  
49  
50 If study attrition is higher, the study still has  $> 80\%$  power for secondary outcomes (Table 3).  
51  
52

### 53 54 **Ethics and Dissemination**

1  
2  
3 The trial was approved by Michigan State University's Biomedical Institutional Review  
4 Board (FWA 00004556). It has been submitted for voluntary review by the Community Based  
5  
6 Organization Partners Community Ethics Review Board.<sup>98</sup> A three-member external Data and  
7  
8 Safety Monitoring Board reviews data and safety of study participants. Trial safety procedures  
9  
10 are codified through checklists and a written manual of operating procedures.  
11  
12  
13

### 14 **Informed consent and confidentiality**

15  
16  
17 When potential participants contact the study, study RAs meet with them privately  
18  
19 (electronically or in person). RAs explain risks, benefits, and the voluntary nature of the study and  
20  
21 obtain participants' signed informed consent.  
22

23  
24 Confidentiality is protected by having all information collected and handled by research  
25  
26 staff trained to deal appropriately with sensitive clinical issues. Participants are informed about the  
27  
28 limits of confidentiality concerning suicidal intent, homicidal intent, and suspected child or elder  
29  
30 abuse. Computer files are available only to authorized personnel, with no names or obvious  
31  
32 identifying information stored in data files. Confidentiality of recordings of study assessments and  
33  
34 treatment sessions is protected through: (1) use of encrypted audio recorders and HIPAA-  
35  
36 compliant videoconferencing; (2) labeling recordings with study IDs rather than names; (3) storing  
37  
38 recordings on a secured computer server designed to hold and protect research data; and (4)  
39  
40 limiting access to recordings.  
41  
42  
43

### 44 **Participant safety**

45  
46  
47 **Adverse events.** Participant safety is monitored during study assessments and during study  
48  
49 treatment sessions. Pre-specified adverse events are recorded and monitored using a structured  
50  
51 system created within REDCap with alerts for follow-up actions.<sup>65</sup>  
52  
53  
54  
55  
56  
57  
58  
59

1  
2  
3       **Suicide risk.** During assessments, participants who score 2 or above (any active suicide  
4 ideation) on the QIDS suicide item are transferred via warm handoff to a national suicide hotline  
5  
6 contracted for this trial. The suicide hotline assesses suicidality and emergent treatment needs,  
7  
8 provides appropriate follow-up, and securely transmits a written disposition. This procedure has  
9  
10 worked well in previous trials.<sup>65</sup>  
11  
12

13  
14       **Clinical deterioration.** If a participant develops manic or psychotic symptoms, or if her  
15 QIDS score increases by 5+ points from baseline, she is evaluated by an independent clinician to  
16  
17 see if she needs to be referred for other treatment and/or removed from the trial.  
18  
19

20  
21       **Treatment nonresponse.** Women in either condition whose MDD has not remitted by the  
22 end of the study (week 28) are referred for other treatment.  
23  
24

#### 25 26 **Dissemination policy and access to data**

27  
28       In addition to dissemination through academic papers and presentation to clinical  
29 communities, we will also share results with community organizations through which we recruited  
30  
31 through written reports and community talks and will offer to share final study results with study  
32  
33 participants. De-identified datasets will be available to qualified investigators upon request.  
34  
35

#### 36 37 **Conclusion**

38  
39       This will be the first fully-powered RCT evaluating treatment for any psychiatric disorder  
40 following perinatal loss, a population whose distress has historically been minimized. Given the  
41  
42 more than 160 requests for the IPT manual fulfilled to date worldwide, results have high potential  
43  
44 for dissemination and uptake.  
45  
46  
47  
48  
49  
50  
51  
52  
53  
54  
55  
56  
57  
58  
59  
60

1  
2  
3 **Author statement. Johnson:** Conceptualization (lead), funding acquisition (lead), investigation  
4 (lead), intervention development (equal), safety protocols (lead), writing – original draft  
5 preparation (lead), writing – review and editing (lead). **Zlotnick:** Conceptualization (supporting),  
6 funding acquisition (supporting), clinical supervision (equal), safety protocols (supporting),  
7 writing – review and editing (supporting). **Price:** Funding acquisition (supporting), intervention  
8 development (equal), clinical supervision (equal). **Sikorskii:** Conceptualization (supporting),  
9 funding acquisition (supporting), data curation, formal analysis. **Key:** Funding acquisition  
10 (supporting), recruitment strategy (supporting). **Lamphere, Taylor, Huff, and Cinader:**  
11 Recruitment strategies (lead), development of operating procedures (supporting), choice of  
12 measures (supporting).  
13  
14  
15  
16  
17  
18  
19  
20  
21  
22  
23  
24  
25

26 **Funding statement.** This work was supported by the Eunice Kennedy Shriver National Institute  
27 of Child Health and Human Development (NICHD) grant number (R01 HD100471). NICHD had  
28 no role in the design of the study and will have no role in the implementation of the study, analysis  
29 of the data, or writing of the manuscript.  
30  
31  
32  
33  
34

35 **Competing interests statement.** The authors have no competing interests.  
36  
37  
38  
39  
40  
41  
42  
43  
44  
45  
46  
47  
48  
49  
50  
51  
52  
53  
54  
55  
56  
57  
58  
59  
60

Table 1

Outline of IPT for major depressive disorder following perinatal loss

| Session name                                    | Session activities                                                                                                                                                                                                                                                                                                                                                                                                                                                            |
|-------------------------------------------------|-------------------------------------------------------------------------------------------------------------------------------------------------------------------------------------------------------------------------------------------------------------------------------------------------------------------------------------------------------------------------------------------------------------------------------------------------------------------------------|
| <b>1: Emotions of grief</b>                     | Each woman tells her perinatal loss story and: expresses her feelings at the time of her loss, feels and expresses her current feelings about her loss, elicits support from and supports the other group members.                                                                                                                                                                                                                                                            |
|                                                 | Each woman is guided to: identify current supportive people, select one person to ask for grief support, role-play how to ask for support.                                                                                                                                                                                                                                                                                                                                    |
| <b>2: Understanding what happened</b>           | Each woman: explores her understanding of what happened to her pregnancy/baby, explores her thoughts/feelings about fault or blame, explores what the loss means to her, begins to explore who she has talked to about the loss and how she talks to them about her needs, identifies who she will invite to Session 3, role-plays how to communicate this invitation.                                                                                                        |
|                                                 | The therapist: helps each woman unpack and examine whether there was anything she could have done to change the outcome, with support from the group, guides the women to seek information from their OBGYN providers about what does and does not contribute to perinatal loss, guides women to identify additional questions for their providers, helps each woman explore how she makes sense of her loss.                                                                 |
| <b>3: Grieving with others</b>                  | Each woman is encouraged to invite a support person to the group. The therapist provides psychoeducation about: depression, grieving styles, ways to manage grieving differences, how IPT helps women recover and how partner/family/friend support can help women recover.                                                                                                                                                                                                   |
|                                                 | Next the therapist guides each woman and her support person to: complete a written communication exercise about both partners' loss-related emotional needs, discuss their written answers privately for 20 minutes, discuss as a group what they learned from each other about support, discuss how each pair will manage communication with others in their social network, develop communication homework to improve each pair's support of each other regarding the loss. |
| <b>4: Holding the memory and moving forward</b> | Each woman discusses how she: holds the memory/meaning of her loss experience, can re-engage in life roles, seeks support and communication with key people, reflects on her grief process and her recovery from depression.                                                                                                                                                                                                                                                  |
|                                                 | The therapist guides the group by: reminding them that new members are added next week and discussing ways to welcome them, eliciting and role-modeling how to offer well-wishes to and from women completing their group treatment in this session.                                                                                                                                                                                                                          |

Table 2

## Schedule of Assessments

| Measure                                         | Baseline | Week 8 | Week 16 | Week 28 |
|-------------------------------------------------|----------|--------|---------|---------|
| <b>Diagnosis and safety</b>                     |          |        |         |         |
| SCID-5                                          | X        |        |         |         |
| Women's Experience with Battering screener      | X        |        |         |         |
| Longitudinal Interval Follow-up Examination     | X        | X      | X       | X       |
| <b>Psychiatric symptoms</b>                     |          |        |         |         |
| Quick Inventory of Depressive Symptoms          | X        | X      | X       | X       |
| Life Events Checklist and PTSD Checklist        | X        | X      | X       | X       |
| <b>Hypothesized mediators</b>                   |          |        |         |         |
| Multidim. Scale of Perceived Social Support     | X        | X      | X       | X       |
| Relationship Assessment Scale                   | X        | X      | X       | X       |
| Social Adjustment Scale total score             | X        | X      | X       | X       |
| Social Adjustment Scale parental functioning    | X        | X      | X       | X       |
| <b>Other outcomes (grief, well-being, fear)</b> |          |        |         |         |
| NIH Neuro-Quality of Life scale                 | X        | X      | X       | X       |
| Perinatal Bereavement Grief Scale               | X        | X      | X       | X       |
| Inventory of Complicated Grief                  | X        | X      | X       | X       |
| Loss Beliefs Scale                              | X        | X      | X       | X       |
| Fear of subsequent pregnancies                  | X        | X      | X       | X       |
| <b>Treatment acceptability of IPT and CWD</b>   |          |        |         |         |
| Client Satisfaction Scale – Revised             |          |        | X       |         |

Table 3

Power for n = 274 for secondary outcomes

|               | <i>d</i> = .29 | <i>d</i> = .32 | <i>d</i> = .35 |
|---------------|----------------|----------------|----------------|
| 10% attrition | .81            | <b>.88</b>     | .93            |
| 15% attrition | .74            | .83            | .88            |
| 20% attrition | .72            | .80            | .86            |
| 25% attrition | .69            | .78            | .84            |

## References

1. Armstrong DS. Emotional Distress and Prenatal Attachment in Pregnancy After Perinatal Loss. *Journal of Nursing Scholarship* 2002;34(4):339-45.
2. AmericanPregnancy. 2008 [Available from: [www.americanpregnancy.org/main/statistics.html](http://www.americanpregnancy.org/main/statistics.html) accessed June 2008.
3. Gavin N, Gaynes, BN, Lohr, KN, Meltzer-Brody, S, Gartlehner, G, & Swinson, T. Perinatal depression: A systematic review of prevalence and incidence. *Obstet Gynecol* 2005;106(5 Pt 1):1071-83.
4. Klier CM, Geller PA, Ritsher JB. Affective disorders in the aftermath of miscarriage: A comprehensive review. *Archives of Women's Mental Health* 2002;5(4):129-49.
5. Neugebauer R, Kline J, Shrout P, et al. Major depressive disorder in the 6 months after miscarriage. *JAMA: Journal of the American Medical Association* 1997;277(5):383-88.
6. Lee DTS, Wong CK, Cheung LP, et al. Psychiatric morbidity following miscarriage: A prevalence study of Chinese women in Hong Kong. *Journal of Affective Disorders* 1997;43(1):63-68.
7. Neugebauer R. Depressive symptoms at two months after miscarriage: Interpreting study findings from an epidemiological versus clinical perspective. *Depression and Anxiety Special issue: Anxiety disorders in women* 2003;17(3):152-61.
8. Neugebauer R, Kline J, O'Connor P, et al. Determinants of depressive symptoms in the early weeks after miscarriage. *American Journal of Public Health* 1992a;82(10):1332-39.
9. Neugebauer R, Kline J, O'Conner P, et al. Depressive symptoms in women in the six months after miscarriage. *American Journal of Obstetrics and Gynecology* 1992 b;166(1 Pt 1):104-09.



10. Beutel M, Deckardt, R., von Rad, M., Weiner, H. Grief and depression after miscarriage: Their separation, antecedent, and course. *Psychosomatic Medicine* 1995;57:517-26.
11. Thapar A, Thapar A. Psychological sequelae of miscarriage: a controlled study using the general health questionnaire and the hospital anxiety and depression scale. *British Journal of General Practice* 1992;42:94-96.
12. Stirtzinger RM, Robinson GE, Stewart DE, et al. Parameters of grieving in spontaneous abortion. *International Journal of Psychiatry in Medicine* 1999;29(2):235-49.
13. Gold KJ, Leon, I., Boggs, M. E., Sen, A. Depression and Posttraumatic Stress Symptoms After Perinatal Loss in a Population-Based Sample. *Journal of Women's Health* 2016;25(3):263-69.
14. Boyle FM, Vance JC, Najman JM, et al. The mental health impact of stillbirth, neonatal death or sids: Prevalence and patterns of distress among mothers. *Social Science & Medicine* 1996;43(8):1273-82.
15. Vance JC, Boyle FM, Najman JM, et al. Gender differences in parental psychological distress following perinatal death or sudden infant death syndrome. *British Journal of Psychiatry* 1995;167(6):806-11.
16. Clarke M, Williams AJ. Depression in women after perinatal death. *Lancet* 1979;1:916-17.
17. Carrera L, Diez-Domingo J, Montanana V, et al. Depression in women suffering perinatal loss. *International Journal of Gynecology & Obstetrics* 1998;62:149-53.
18. Janssen HJEM, Cuisinier MCJ, Hoogduin KAL, et al. Controlled prospective study on the mental health of women following pregnancy loss. *American Journal of Psychiatry* 1996;153(2):226-30.

- 1  
2  
3 19. Kulathilaka S, Hanwella, R., de Silva, V. A. Depressive disorder and grief following  
4  
5 spontaneous abortion. *BMC Psychiatry* 2016;16:100.  
6
- 7  
8 20. Wall-Wieler E, Roos, L. L., Bolton, J. Duration of maternal mental health-related outcomes  
9  
10 after an infants death: A retrospective matched cohort study using linkable administrative  
11  
12 data. *Depression and Anxiety* 2018;35:305-12.  
13
- 14  
15 21. Gravensteen IK, Helgadóttir, L. B., Jacobsen, E, Radestad, I., Sandset, P. M., Ekeberg, O.  
16  
17 Women's experiences in relation to stillbirth and risk factors for long-term post-traumatic  
18  
19 stress symptoms: a retrospective study. *BMJ Open* 2013;3:e003323.  
20
- 21  
22 22. Gissler M, Hemminki E, Lonnqvist J. Suicides after pregnancy in Finland, 1987-1994: Register  
23  
24 linkage study. *British Medical Journal* 1996;313(7070):1431-34.  
25
- 26  
27 23. Schiff MA, Grossman DC. Adverse perinatal outcomes and risk for postpartum suicide attempt  
28  
29 in Washington State, 1987-2001. *Pediatrics* 2006;118(3):e669-e75.  
30
- 31  
32 24. Engelhard I, van den Hout, MA, Arntz, A. Posttraumatic stress disorder after pregnancy loss.  
33  
34 *General Hospital Psychiatry* 2001;23(2):62-66.  
35
- 36  
37 25. Nikcevic AV. Development and evaluation of a miscarriage follow-up clinic. *Journal of*  
38  
39 *Reproductive and Infant Psychology* 2003;21(3):207-17.  
40
- 41  
42 26. Hutti MH. Behavioural issues of miscarriage: The parents' point of view. *Journal of*  
43  
44 *Emergency Nursing* 1988;14:367-68.  
45
- 46  
47 27. Nikols J. Illegitimate mourners. In children and death: Perspectives and challenges.  
48  
49 Symposium sponsored by Children's Hospital Medical Centre of Akron, Ohio. Akron, Ohio,  
50  
51 1984.  
52
- 53  
54 28. Rando T. Parental loss of child. Illinois: Research Press Company 1986.  
55  
56  
57  
58  
59  
60

- 1  
2  
3 29. DiMarco M, Menke, EM, McNamara, T. Evaluating a support group for perinatal loss. *The*  
4  
5 *American Journal of Maternal/Child Nursing* 2001;26(3):135-40.  
6  
7  
8 30. McCreight B. Perinatal loss: A qualitative study in Northern Ireland. *Journal of Death and*  
9  
10 *Dying* 2008;57(1):1-19.  
11  
12 31. Conway K. Miscarriage experience and the role of support systems: A pilot study. *British*  
13  
14 *Journal of Medical Psychology* 1995;68(3):259-67.  
15  
16 32. Brier N. Understanding and managing the emotional reactions to miscarriage. *Obstet Gynecol*  
17  
18 1999;93:151-55.  
19  
20 33. Cordle CJ, Prettyman RJ. A 2-year follow-up of women who have experienced early  
21  
22 miscarriage. *Journal of Reproductive and Infant Psychology* 1994;12(1, Jan-Mar )  
23  
24  
25 34. Johnson J, Price AB, Kao, JC, Fernandes, K. Stout, RL, Gobin, R, Zlotnick, C. Interpersonal  
26  
27 psychotherapy (IPT) for major dperession following perinatal loss: A pilot randomized  
28  
29 controlled trial. *Archives of Women's Mental Health* 2016;19(5):845-59.  
30  
31  
32 35. Crockett K, Zlotnick C, Davis M, et al. A depression preventive intervention for rural low-  
33  
34 income African-American pregnant women at risk for postpartum depression. *Arch*  
35  
36 *Womens Ment Health* 2008;11(5-6):319-25. doi: 10.1007/s00737-008-0036-3 [published  
37  
38 Online First: 2008/11/05]  
39  
40  
41 36. O'Hara MW, Stuart, S., Gorman, L.L., Wenzel, A. Efficacy of Interpersonal Psychotherapy for  
42  
43 Postpartum Depression. *Archives of General Psychiatry* 2000;57(11):1039-45.  
44  
45  
46 37. Ramezani S, Khosravi, A., Motaghi, Z., Hamidzadeh, A., Mousavi, S. A. The effect of  
47  
48 cognitive-behavioural and solution-focused counselling on prevention of postpartum  
49  
50 depression in nulliparous pregnant women. *Journal of Reproductive and Infant Psychology*  
51  
52 2017;35(2):172-82.  
53  
54  
55  
56  
57  
58  
59  
60

- 1  
2  
3 38. Milgrom JD, B. G., Gemmill, A. W., Holt, C., Christopher, J. Internet cognitive behavioral  
4 therapy for women with postnatal depression: A randomized controlled trial of  
5 MumMoodBooster. *Journal of Medical Internet Research* 2016;18(3)  
6  
7  
8  
9  
10 39. Nørskov F, Espenhain, L, Rogvi, S, Morgen, CS, Andersen, PK, Andersen, A. Socioeconomic  
11 position and the risk of spontaneous abortion: a study within the Danish National Birth  
12 Cohort. *BMJ Open* 2012;2:e001077.  
13  
14  
15  
16  
17 40. Seaton S, Field, DJ, Draper, ES, Manktelow, BN, Smith, GCS, Springett, A, Smith, LK.  
18 Socioeconomic inequalities in the rate of stillbirths by cause: a population-based study.  
19 *BMJ Open* 2012;2:e001100.  
20  
21  
22  
23  
24 41. Singh G, Daus, GP, Allender, M, Ramey, CT, Martin, EK, Perry, C, De Los Reyes, AA,  
25 Vedamuthu, IP. Social Determinants of Health in the United States: Addressing Major  
26 Health Inequality Trends for the Nation, 1935-2016. *International Journal of MCH and*  
27 *AIDS* 2017;6(2):139-64.  
28  
29  
30  
31  
32  
33 42. Hobfoll SE, Ritter C, Lavin J, et al. Depression prevalence and incidence among inner-city  
34 pregnant and postpartum women. *Journal of Consulting and Clinical Psychology*  
35 1995;63(3):445-53.  
36  
37  
38  
39  
40 43. Scholle SH, Haskett RF, Hanusa BH, et al. Addressing depression in obstetrics/gynecology  
41 practice. *General Hospital Psychiatry* 2003;25(2):83-90.  
42  
43  
44  
45 44. Davilla M, McFall, S.L., & Cheng, D. Acculturation and depressive symptoms among pregnant  
46 and postpartum Latinas. *Maternal and Child Health Journal*, 2008;13:318-25.  
47  
48  
49 45. Chaudron LH, Kitzman, H.J., Peifer, K.L., Morrow, S. Perez, L.M., & Newman, M.C.  
50 Prevalence of maternal depressive symptoms in low-income Hispanic women. *Journal of*  
51 *Clinical psychiatry* 2005;66(4):418-23.  
52  
53  
54  
55  
56  
57  
58  
59  
60

- 1  
2  
3 46. Boury J, Larkin K, Krummel D. Factors related to postpartum depressive symptoms in low-  
4  
5 income women. *Women and Health* 2004;39(3):19-34.  
6  
7  
8 47. Price S, Proctor E. A rural perspective on perinatal depression: Prevalence, correlates, and  
9  
10 implications for help-seeking among low-income women. *The Journal of Rural Health*  
11  
12 2009;25(2):158-66.  
13  
14  
15 48. Hobfoll SE, Ritter C, Lavin J, et al. Depression prevalence and incidence among inner-city  
16  
17 pregnant and postpartum women. *Journal of Consulting and Clinical Psychology*  
18  
19 1995;63(3):445-53.  
20  
21  
22 49. Morris-Rush JK, Freda, M.C., & Bernstein, P.S. Screening for postpartum depression in an  
23  
24 inner-city population. *American Journal of Obstetrics and Gynecology* 2003;188(5):1217-  
25  
26 19.  
27  
28  
29 50. Evans J, Heron J, H. F, et al. Cohort study of depressed mood during pregnancy and after  
30  
31 childbirth. *British Medical Journal* 2001;323:257-60.  
32  
33  
34 51. Mukherjee S, Edwards, DRV, Baird, DD, Savitz, DA, Hartmann, KE. Risk of Miscarriage  
35  
36 Among Black Women and White Women in a US Prospective Cohort Study. *Am J*  
37  
38 *epidemiol* 2013;177(11):1271-78.  
39  
40  
41 52. Willinger M, Ko, C, Reddy, UM. RACIAL DISPARITIES IN STILLBIRTH RISK ACROSS  
42  
43 GESTATION IN THE UNITED STATES. *Am J Obstet Gynecol* 2009;201(5):469.e1-  
44  
45 69.e8.  
46  
47  
48 53. US\_Department\_of\_Health\_and\_Human\_Services. Infant Mortality and African Americans  
49  
50 2017 [Available from: <https://minorityhealth.hhs.gov/omh/browse.aspx?lvl=4&lvlid=23>  
51  
52 accessed 12-10-2018 2018.  
53  
54 54. Johnson JE. Efficacy of group treatments for major depressive disorder. . under review  
55  
56  
57  
58  
59  
60

- 1  
2  
3 55. Cuijpers P. A psychoeducational approach to the treatment of depression: A meta-analysis of  
4  
5 Lewinsohn's "Coping with Depression" course. *Behavior Therapy* 1998;29:521-33.  
6  
7  
8 56. Gilbert K, & Smart, LS. Coping with infant or fetal loss: The couple's healing process. . New  
9  
10 York: Bruner/Mazel 1992.  
11  
12 57. Lewinsohn P, Antonuccio, DO, Breckenridge, JS, & Teri, L. The "Coping With Depression"  
13  
14 course. Eugene, OR: Castalia 1984.  
15  
16  
17 58. American Psychiatric Association. Diagnostic and statistical manual of mental disorders (5th  
18  
19 ed.). Washington DC: American Psychiatric Association 2013.  
20  
21  
22 59. Zlotnick C, Johnson J, Najavits LM. Randomized controlled pilot study of cognitive-  
23  
24 behavioral therapy in a sample of incarcerated women with substance use disorder and  
25  
26 PTSD. *Behavior therapy* 2009;40(4):325-36. doi: 10.1016/j.beth.2008.09.004 [published  
27  
28 Online First: 2009/11/07]  
29  
30  
31 60. Stein M, Caviness C, Anderson B, et al. A brief alcohol intervention for hazardously-drinking  
32  
33 incarcerated women. *Addiction* 2010;105(3):466-75.  
34  
35  
36 61. Johnson J, Zlotnick C. Pilot study of treatment for major depression among women prisoners  
37  
38 with substance use disorder. under review  
39  
40  
41 62. Johnson JE, Zlotnick C. A pilot study of group interpersonal psychotherapy for depression in  
42  
43 substance-abusing female prisoners. *J Subst Abuse Treat* 2008;34(4):371-7. doi: S0740-  
44  
45 5472(07)00153-5 [pii]  
46  
47  
48 10.1016/j.jsat.2007.05.010 [published Online First: 2007/07/17]  
49  
50  
51 63. Stein MD, Hagerty CE, Herman DS, et al. A brief marijuana intervention for non-treatment-  
52  
53 seeking young adult women. *J Subst Abuse Treat* 2011;40(2):189-98. doi: S0740-  
54  
55 5472(10)00234-5 [pii]  
56  
57  
58  
59  
60

- 1  
2  
3 10.1016/j.jsat.2010.11.001 [published Online First: 2010/12/28]  
4  
5  
6 64. Stein M, Charuvastra A, Maksad J, et al. A randomized trial of a brief alcohol intervention for  
7  
8 needle exchangers (BRAINE). *Addiction* 2002;97(6):691-700.  
9  
10 65. Johnson J, Jones, R., Miller, T., Miller, I., Stanley, B., Brown, G., Arias, SA, Cerbo, L.,  
11  
12 Rexroth, J., Fitting, J., Russell, D., Kubiak, S., Stein, M., Matkovic, C., YEn, S., Gaudiano,  
13  
14 B., Weinstock, LM. Study protocol: A randomized controlled trial of suicide risk reduction  
15  
16 in the year following jail release (the SPIRIT Trial). *Contemporary Clinical Trials*  
17  
18 2020;94:106003.  
19  
20  
21 66. First M, Williams, JBW, Karg, RS, Spitzer, RL. Structured Clinical Interview for DSM-5.  
22  
23 Arlington, VA: American Psychiatric Association 2015.  
24  
25  
26 67. Keller M, Lavori, PW, & Nielsen, E. SCALUP (SCID-P plus SADS-L). Providence, RI: Butler  
27  
28 Hospital 1987.  
29  
30  
31 68. Warshaw M, Keller, MB, & Stout, R. Reliability and validity of the longitudinal interval  
32  
33 follow-up evaluation for assessing outcome of anxiety disorders. *Journal of Psychiatric*  
34  
35 *Research* 1994;28:531-45.  
36  
37  
38 69. Keller M. Past, present, and future directions for defining optimal treatment outcome in  
39  
40 depression: Remission and beyond. *JAMA* 2003;289(3152-3160)  
41  
42  
43 70. Keller M, Lavori, PW, Friedman, B, Nielson, E, Endicott, J, McDonald-Scott, P, & Andreasen,  
44  
45 NC. The Longitudinal Interval Follow-up Evaluation: A comprehensive method for  
46  
47 assessing outcome in prospective longitudinal studies. *Archives of General Psychiatry*  
48  
49 1987a;44:540-48.  
50  
51  
52 71. Dawson R, Lavori, PW, Coryell, WH, Endicott, J., & Keller, MB. Course of treatment received  
53  
54 by depressed patients. *Journal of Psychiatric Research* 1999;33(3):233-42.  
55  
56  
57  
58  
59

- 1  
2  
3  
4  
5  
6  
7  
8  
9  
10  
11  
12  
13  
14  
15  
16  
17  
18  
19  
20  
21  
22  
23  
24  
25  
26  
27  
28  
29  
30  
31  
32  
33  
34  
35  
36  
37  
38  
39  
40  
41  
42  
43  
44  
45  
46  
47  
48  
49  
50  
51  
52  
53  
54  
55  
56  
57  
58  
59  
60
72. Gallagher-Thompson D, Hanley-Peterson, P, & Thompson, LW. Maintenance of gains versus relapse following brief psychotherapy for depression. *Journal of Consulting and Clinical Psychology* 1990;58(3):371-74.
73. Seifer R, Dickstein, S, Sameroff, AJ, Magee, KD, & Hayden, LC. Infant mental health and variability of parental depressive symptoms. *Journal of the American Academy of Child and Adolescent Psychiatry* 2001;40:1375-82.
74. Smith P, Earp, JA, Devellis, R. Measuring battering: Development of the Women's Experience with Battering (WEB) scale. *Women's Health: Research on gender, behavior, and policy* 1995;1(4):273-88.
75. Rush A, Trivedi, MH, Ibrahim, HM, Carmody, TJ, Arnow, B, Klein, DN, Markowitz, JC, Ninan, PT, Kornstein, S, Manber, R, Thase, ME, Kocsis, JH, Keller, MB. The 16-item quick inventory of depressive symptomatology (QIDS), clinician rating (QIDS-C), and self-report (QIDS-SR): A psychometric evaluation in patients with chronic major depression. *Biological Psychiatry* 2003;54(5):573-83.
76. Weathers F, Litz, BT, Keane, TM, Palmieri, PA, Marx, BP, Y Schnurr, PP. The PTSD Checklist for DSM-5 (PCL-5). : National Center for PTSD; 2013 [Available from: [www.ptsd.va.gov](http://www.ptsd.va.gov)].
77. Blevins C, Weathers, FW, Davis, MT, Witte, TK, & Domino, JL. The Posttraumatic Stress Disorder Checklist for DSM-5 (PCL-5): Development and initial psychometric evaluation. *Journal of Traumatic Stress*, 2015;28:489-98.
78. Bovin M, Marx, BP, Weathers, FW, Gallagher, MW, Rodriguez, P, Schnurr, PP, and Keane, TM. Psychometric properties of the PTSD Checklist for Diagnostic and Statistical Manual



- of Mental Disorders-Fifth Edition (PCL-5) in Veterans. . *Psychological Assessment*, 2015;28:1379-91. .
79. Wortmann J, Jordan, AH, Weathers, FW, Resick, PA, Dondanville, KA, Hall-Clark, B., Foa, EB, Youhg-McCaughan, S., Yarvis, J, Hembree, EA, Mintz, J, Peterson, AL, Litz, BT. Psychometric analysis of the PTSD Checklist-5 (PCL-5) among treatment-seeking military service members. . *Psychological Assessment*, 2015;28:1392-403.
80. Dahlem N, Zimet, GW, Walker RR. The Multidimensional Scale of Perceived Support: A confirmation study. *Journal of Clinical Psychology* 1991;47(6):756-61.
81. Renshaw K, McKnight, P, Caska, CM, Blais, RK. The utility of the Relationship Assessment Scale in multiple types of relationships. *Journal of social and Personal Relationships* 2011;28(4):435-47.
82. Gameroff M, Wickramaratne, P., Weissman, M.M. Testing the Short and Screener versions of the Social Adjustment Scale –Self-report (SAS-SR). *Int J Methods Psychiatr Res* 2012;21(1):52-65.
83. Salsman J, Victorson, D, Choi, SW, Peterman, AH, Heinemann, AW, Nowinski, C, Cella, D. Development and validation of the positive affect and well-being scale for the neurology quality of life (Neuro-QOL) measurement system. *Qual Life Res* 2013;22(9):2569-80.
84. Ritsher J, & Neugebauer, R. Perinatal Bereavement Grief Scale: Distinguishing grief from depression following a miscarriage. *Assessment* 2002;9:31-40.
85. Prigerson H, Maciejewski, PK, & Reynolds, CF. Inventory of Complicated Grief: A scale to measure maladaptive symptoms of loss. *Psychiatry Research* 1995;59(1-2):65-79.
86. Callan M, Kay, AC, Dawtry, RJ. Making Sense of Misfortune: Deservingness, Self-Esteem, and Patterns of Self-Defeat. *J Pers Soc Psychol* 2014;107(1):142-62.

- 1  
2  
3  
4  
5  
6  
7  
8  
9  
10  
11  
12  
13  
14  
15  
16  
17  
18  
19  
20  
21  
22  
23  
24  
25  
26  
27  
28  
29  
30  
31  
32  
33  
34  
35  
36  
37  
38  
39  
40  
41  
42  
43  
44  
45  
46  
47  
48  
49  
50  
51  
52  
53  
54  
55  
56  
57  
58  
59  
60
87. Lucas T, Alexander, S., Firestone, I. Belief in a just world, social influence and illness attributions: Evidence of a just world boomerang effect. *Journal of Health Psychology* 2009;14(2):258-66.
88. Glinder JG, and Compas, B. E. Self-blame attributions in women with newly diagnosed breast cancer: A prospective study of psychological adjustment. *Health Psychology* 1999;18(5):475-81.
89. Larsen D, Attkisson, CC, Hargreaves, WA, & Nguyen, TD. Assessment of client/patient satisfaction: Development of a general scale. *Evaluation and Program Planning* 1979;2:197-207.
90. Coalition T. Client Satisfaction Questionnaire (CSQ-8) 2008 [Available from: [www.tchcoalition.org/PM/Questionnaire.doc](http://www.tchcoalition.org/PM/Questionnaire.doc) accessed 9/23/2008 2008.
91. Citrome L. Compelling or irrelevant? Using number needed to treat can help decide. *Acta Psychiatrica Scandinavica* 2008;117(6):412-19.
92. Kraemer H. A source of false findings in published research studies: Adjusting for covariates. *JAMA Psychiatry* 2015;72:961-62.
93. Little R, Rubin M. Statistical Analysis with Missing Data. New York: Wiley and Sons 1987.
94. Hogan JW, Roy J, Korkontzelou C. Handling drop-out in longitudinal studies. *Statistics in Medicine* 2004;23(9):1455-97.
95. Shen C, Weissfeld L. Application of pattern-mixture models to outcomes that are potentially missing not at random using pseudo maximum likelihood estimation. *Biostatistics* 2005;6(2):333-47.
96. Preacher KJ SJ. Advantages of Monte Carlo confidence intervals for indirect effects. *Communication Methods and Measures* 2012;6:77-98.

1  
2  
3 97. Biesanz JC FC, Savalei V. Assessing mediational models: Testing and interval estimation for  
4 indirect effects. . *Multivariate Behavioral Research* 2010;45:661-701.  
5

6  
7  
8 98. Community\_Based\_Organization\_Partners. Community Based Organization Partners -  
9  
10 Community Ethics Review Board (CBOP-CERB) 2021 [Available from:  
11 <https://www.hfrcc.org/cerb/> accessed 9-17-21 2021.  
12  
13  
14  
15  
16  
17  
18  
19  
20  
21  
22  
23  
24  
25  
26  
27  
28  
29  
30  
31  
32  
33  
34  
35  
36  
37  
38  
39  
40  
41  
42  
43  
44  
45  
46  
47  
48  
49  
50  
51  
52  
53  
54  
55  
56  
57  
58  
59  
60

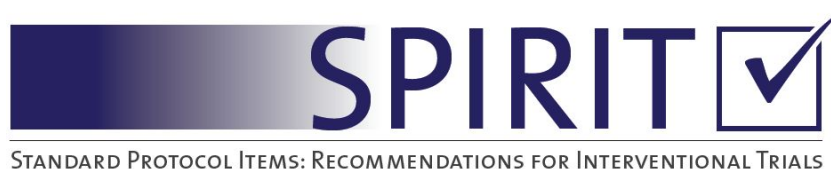

SPIRIT 2013 Checklist: Recommended items to address in a clinical trial protocol and related documents\*

| Section/item                      | Item No | Description                                                                                                                                                                                                                                                                              | Pages |
|-----------------------------------|---------|------------------------------------------------------------------------------------------------------------------------------------------------------------------------------------------------------------------------------------------------------------------------------------------|-------|
| <b>Administrative information</b> |         |                                                                                                                                                                                                                                                                                          |       |
| Title                             | 1       | Descriptive title identifying the study design, population, interventions, and, if applicable, trial acronym                                                                                                                                                                             | 1     |
| Trial registration                | 2a      | Trial identifier and registry name. If not yet registered, name of intended registry                                                                                                                                                                                                     | 3     |
|                                   | 2b      | All items from the World Health Organization Trial Registration Data Set                                                                                                                                                                                                                 |       |
| Protocol version                  | 3       | Date and version identifier                                                                                                                                                                                                                                                              | NA    |
| Funding                           | 4       | Sources and types of financial, material, and other support                                                                                                                                                                                                                              | 18    |
| Roles and responsibilities        | 5a      | Names, affiliations, and roles of protocol contributors                                                                                                                                                                                                                                  | 1, 18 |
|                                   | 5b      | Name and contact information for the trial sponsor                                                                                                                                                                                                                                       |       |
|                                   | 5c      | Role of study sponsor and funders, if any, in study design; collection, management, analysis, and interpretation of data; writing of the report; and the decision to submit the report for publication, including whether they will have ultimate authority over any of these activities |       |
|                                   | 5d      | Composition, roles, and responsibilities of the coordinating centre, steering committee, endpoint adjudication committee, data management team, and other individuals or groups overseeing the trial, if applicable (see Item 21a for data monitoring committee)                         |       |
| <b>Introduction</b>               |         |                                                                                                                                                                                                                                                                                          |       |
| Background and rationale          | 6a      | Description of research question and justification for undertaking the trial, including summary of relevant studies (published and unpublished) examining benefits and harms for each intervention                                                                                       | 4-6   |
|                                   | 6b      | Explanation for choice of comparators                                                                                                                                                                                                                                                    |       |
| Objectives                        | 7       | Specific objectives or hypotheses                                                                                                                                                                                                                                                        | 5     |

|    |                                                           |     |                                                                                                                                                                                                                                                                                                                                                                                |       |
|----|-----------------------------------------------------------|-----|--------------------------------------------------------------------------------------------------------------------------------------------------------------------------------------------------------------------------------------------------------------------------------------------------------------------------------------------------------------------------------|-------|
| 1  |                                                           |     |                                                                                                                                                                                                                                                                                                                                                                                |       |
| 2  | Trial design                                              | 8   | Description of trial design including type of trial (eg, parallel group, crossover, factorial, single group), allocation ratio, and framework (eg, superiority, equivalence, noninferiority, exploratory)                                                                                                                                                                      | 9     |
| 3  |                                                           |     |                                                                                                                                                                                                                                                                                                                                                                                |       |
| 4  |                                                           |     |                                                                                                                                                                                                                                                                                                                                                                                |       |
| 5  |                                                           |     |                                                                                                                                                                                                                                                                                                                                                                                |       |
| 6  |                                                           |     |                                                                                                                                                                                                                                                                                                                                                                                |       |
| 7  |                                                           |     |                                                                                                                                                                                                                                                                                                                                                                                |       |
| 8  | <b>Methods: Participants, interventions, and outcomes</b> |     |                                                                                                                                                                                                                                                                                                                                                                                |       |
| 9  |                                                           |     |                                                                                                                                                                                                                                                                                                                                                                                |       |
| 10 | Study setting                                             | 9   | Description of study settings (eg, community clinic, academic hospital) and list of countries where data will be collected. Reference to where list of study sites can be obtained                                                                                                                                                                                             | 9-10  |
| 11 |                                                           |     |                                                                                                                                                                                                                                                                                                                                                                                |       |
| 12 |                                                           |     |                                                                                                                                                                                                                                                                                                                                                                                |       |
| 13 |                                                           |     |                                                                                                                                                                                                                                                                                                                                                                                |       |
| 14 |                                                           |     |                                                                                                                                                                                                                                                                                                                                                                                |       |
| 15 | Eligibility criteria                                      | 10  | Inclusion and exclusion criteria for participants. If applicable, eligibility criteria for study centres and individuals who will perform the interventions (eg, surgeons, psychotherapists)                                                                                                                                                                                   | 8-9   |
| 16 |                                                           |     |                                                                                                                                                                                                                                                                                                                                                                                |       |
| 17 |                                                           |     |                                                                                                                                                                                                                                                                                                                                                                                |       |
| 18 |                                                           |     |                                                                                                                                                                                                                                                                                                                                                                                |       |
| 19 |                                                           |     |                                                                                                                                                                                                                                                                                                                                                                                |       |
| 20 | Interventions                                             | 11a | Interventions for each group with sufficient detail to allow replication, including how and when they will be administered                                                                                                                                                                                                                                                     | 6-8   |
| 21 |                                                           |     |                                                                                                                                                                                                                                                                                                                                                                                |       |
| 22 |                                                           |     |                                                                                                                                                                                                                                                                                                                                                                                |       |
| 23 |                                                           |     |                                                                                                                                                                                                                                                                                                                                                                                |       |
| 24 |                                                           |     |                                                                                                                                                                                                                                                                                                                                                                                |       |
| 25 |                                                           | 11b | Criteria for discontinuing or modifying allocated interventions for a given trial participant (eg, drug dose change in response to harms, participant request, or improving/worsening disease)                                                                                                                                                                                 | 17    |
| 26 |                                                           |     |                                                                                                                                                                                                                                                                                                                                                                                |       |
| 27 |                                                           |     |                                                                                                                                                                                                                                                                                                                                                                                |       |
| 28 |                                                           |     |                                                                                                                                                                                                                                                                                                                                                                                |       |
| 29 |                                                           |     |                                                                                                                                                                                                                                                                                                                                                                                |       |
| 30 |                                                           | 11c | Strategies to improve adherence to intervention protocols, and any procedures for monitoring adherence (eg, drug tablet return, laboratory tests)                                                                                                                                                                                                                              | 10    |
| 31 |                                                           |     |                                                                                                                                                                                                                                                                                                                                                                                |       |
| 32 |                                                           |     |                                                                                                                                                                                                                                                                                                                                                                                |       |
| 33 |                                                           |     |                                                                                                                                                                                                                                                                                                                                                                                |       |
| 34 |                                                           |     |                                                                                                                                                                                                                                                                                                                                                                                |       |
| 35 |                                                           | 11d | Relevant concomitant care and interventions that are permitted or prohibited during the trial                                                                                                                                                                                                                                                                                  | 8     |
| 36 |                                                           |     |                                                                                                                                                                                                                                                                                                                                                                                |       |
| 37 |                                                           |     |                                                                                                                                                                                                                                                                                                                                                                                |       |
| 38 | Outcomes                                                  | 12  | Primary, secondary, and other outcomes, including the specific measurement variable (eg, systolic blood pressure), analysis metric (eg, change from baseline, final value, time to event), method of aggregation (eg, median, proportion), and time point for each outcome. Explanation of the clinical relevance of chosen efficacy and harm outcomes is strongly recommended | 10-12 |
| 39 |                                                           |     |                                                                                                                                                                                                                                                                                                                                                                                |       |
| 40 |                                                           |     |                                                                                                                                                                                                                                                                                                                                                                                |       |
| 41 |                                                           |     |                                                                                                                                                                                                                                                                                                                                                                                |       |
| 42 |                                                           |     |                                                                                                                                                                                                                                                                                                                                                                                |       |
| 43 |                                                           |     |                                                                                                                                                                                                                                                                                                                                                                                |       |
| 44 |                                                           |     |                                                                                                                                                                                                                                                                                                                                                                                |       |
| 45 |                                                           |     |                                                                                                                                                                                                                                                                                                                                                                                |       |
| 46 |                                                           |     |                                                                                                                                                                                                                                                                                                                                                                                |       |
| 47 | Participant timeline                                      | 13  | Time schedule of enrolment, interventions (including any run-ins and washouts), assessments, and visits for participants. A schematic diagram is highly recommended (see Figure)                                                                                                                                                                                               | 20    |
| 48 |                                                           |     |                                                                                                                                                                                                                                                                                                                                                                                |       |
| 49 |                                                           |     |                                                                                                                                                                                                                                                                                                                                                                                |       |
| 50 |                                                           |     |                                                                                                                                                                                                                                                                                                                                                                                |       |
| 51 |                                                           |     |                                                                                                                                                                                                                                                                                                                                                                                |       |
| 52 |                                                           |     |                                                                                                                                                                                                                                                                                                                                                                                |       |
| 53 | Sample size                                               | 14  | Estimated number of participants needed to achieve study objectives and how it was determined, including clinical and statistical assumptions supporting any sample size calculations                                                                                                                                                                                          | 15    |
| 54 |                                                           |     |                                                                                                                                                                                                                                                                                                                                                                                |       |
| 55 |                                                           |     |                                                                                                                                                                                                                                                                                                                                                                                |       |
| 56 |                                                           |     |                                                                                                                                                                                                                                                                                                                                                                                |       |
| 57 |                                                           |     |                                                                                                                                                                                                                                                                                                                                                                                |       |
| 58 |                                                           |     |                                                                                                                                                                                                                                                                                                                                                                                |       |
| 59 |                                                           |     |                                                                                                                                                                                                                                                                                                                                                                                |       |
| 60 |                                                           |     |                                                                                                                                                                                                                                                                                                                                                                                |       |

|    |                                                                     |     |                                                                                                                                                                                                                                                                                                                                                                                                              |              |
|----|---------------------------------------------------------------------|-----|--------------------------------------------------------------------------------------------------------------------------------------------------------------------------------------------------------------------------------------------------------------------------------------------------------------------------------------------------------------------------------------------------------------|--------------|
| 1  |                                                                     |     |                                                                                                                                                                                                                                                                                                                                                                                                              |              |
| 2  | Recruitment                                                         | 15  | Strategies for achieving adequate participant enrollment to reach target sample size                                                                                                                                                                                                                                                                                                                         | <b>9-10</b>  |
| 3  |                                                                     |     |                                                                                                                                                                                                                                                                                                                                                                                                              |              |
| 4  |                                                                     |     |                                                                                                                                                                                                                                                                                                                                                                                                              |              |
| 5  | <b>Methods: Assignment of interventions (for controlled trials)</b> |     |                                                                                                                                                                                                                                                                                                                                                                                                              |              |
| 6  |                                                                     |     |                                                                                                                                                                                                                                                                                                                                                                                                              |              |
| 7  | Allocation:                                                         |     |                                                                                                                                                                                                                                                                                                                                                                                                              | <b>9</b>     |
| 8  |                                                                     |     |                                                                                                                                                                                                                                                                                                                                                                                                              |              |
| 9  | Sequence generation                                                 | 16a | Method of generating the allocation sequence (eg, computer-generated random numbers), and list of any factors for stratification. To reduce predictability of a random sequence, details of any planned restriction (eg, blocking) should be provided in a separate document that is unavailable to those who enrol participants or assign interventions                                                     | <b>9</b>     |
| 10 |                                                                     |     |                                                                                                                                                                                                                                                                                                                                                                                                              |              |
| 11 |                                                                     |     |                                                                                                                                                                                                                                                                                                                                                                                                              |              |
| 12 |                                                                     |     |                                                                                                                                                                                                                                                                                                                                                                                                              |              |
| 13 |                                                                     |     |                                                                                                                                                                                                                                                                                                                                                                                                              |              |
| 14 |                                                                     |     |                                                                                                                                                                                                                                                                                                                                                                                                              |              |
| 15 |                                                                     |     |                                                                                                                                                                                                                                                                                                                                                                                                              |              |
| 16 |                                                                     |     |                                                                                                                                                                                                                                                                                                                                                                                                              |              |
| 17 |                                                                     |     |                                                                                                                                                                                                                                                                                                                                                                                                              |              |
| 18 | Allocation concealment mechanism                                    | 16b | Mechanism of implementing the allocation sequence (eg, central telephone; sequentially numbered, opaque, sealed envelopes), describing any steps to conceal the sequence until interventions are assigned                                                                                                                                                                                                    | <b>9</b>     |
| 19 |                                                                     |     |                                                                                                                                                                                                                                                                                                                                                                                                              |              |
| 20 |                                                                     |     |                                                                                                                                                                                                                                                                                                                                                                                                              |              |
| 21 |                                                                     |     |                                                                                                                                                                                                                                                                                                                                                                                                              |              |
| 22 |                                                                     |     |                                                                                                                                                                                                                                                                                                                                                                                                              |              |
| 23 |                                                                     |     |                                                                                                                                                                                                                                                                                                                                                                                                              |              |
| 24 | Implementation                                                      | 16c | Who will generate the allocation sequence, who will enrol participants, and who will assign participants to interventions                                                                                                                                                                                                                                                                                    | <b>9</b>     |
| 25 |                                                                     |     |                                                                                                                                                                                                                                                                                                                                                                                                              |              |
| 26 |                                                                     |     |                                                                                                                                                                                                                                                                                                                                                                                                              |              |
| 27 |                                                                     |     |                                                                                                                                                                                                                                                                                                                                                                                                              |              |
| 28 | Blinding (masking)                                                  | 17a | Who will be blinded after assignment to interventions (eg, trial participants, care providers, outcome assessors, data analysts), and how                                                                                                                                                                                                                                                                    | <b>10</b>    |
| 29 |                                                                     |     |                                                                                                                                                                                                                                                                                                                                                                                                              |              |
| 30 |                                                                     |     |                                                                                                                                                                                                                                                                                                                                                                                                              |              |
| 31 |                                                                     |     |                                                                                                                                                                                                                                                                                                                                                                                                              |              |
| 32 |                                                                     |     |                                                                                                                                                                                                                                                                                                                                                                                                              |              |
| 33 |                                                                     | 17b | If blinded, circumstances under which unblinding is permissible, and procedure for revealing a participant's allocated intervention during the trial                                                                                                                                                                                                                                                         | <b>NA</b>    |
| 34 |                                                                     |     |                                                                                                                                                                                                                                                                                                                                                                                                              |              |
| 35 |                                                                     |     |                                                                                                                                                                                                                                                                                                                                                                                                              |              |
| 36 |                                                                     |     |                                                                                                                                                                                                                                                                                                                                                                                                              |              |
| 37 | <b>Methods: Data collection, management, and analysis</b>           |     |                                                                                                                                                                                                                                                                                                                                                                                                              |              |
| 38 |                                                                     |     |                                                                                                                                                                                                                                                                                                                                                                                                              |              |
| 39 | Data collection methods                                             | 18a | Plans for assessment and collection of outcome, baseline, and other trial data, including any related processes to promote data quality (eg, duplicate measurements, training of assessors) and a description of study instruments (eg, questionnaires, laboratory tests) along with their reliability and validity, if known. Reference to where data collection forms can be found, if not in the protocol | <b>10-12</b> |
| 40 |                                                                     |     |                                                                                                                                                                                                                                                                                                                                                                                                              |              |
| 41 |                                                                     |     |                                                                                                                                                                                                                                                                                                                                                                                                              |              |
| 42 |                                                                     |     |                                                                                                                                                                                                                                                                                                                                                                                                              |              |
| 43 |                                                                     |     |                                                                                                                                                                                                                                                                                                                                                                                                              |              |
| 44 |                                                                     |     |                                                                                                                                                                                                                                                                                                                                                                                                              |              |
| 45 |                                                                     |     |                                                                                                                                                                                                                                                                                                                                                                                                              |              |
| 46 |                                                                     |     |                                                                                                                                                                                                                                                                                                                                                                                                              |              |
| 47 |                                                                     |     |                                                                                                                                                                                                                                                                                                                                                                                                              |              |
| 48 |                                                                     |     |                                                                                                                                                                                                                                                                                                                                                                                                              |              |
| 49 |                                                                     | 18b | Plans to promote participant retention and complete follow-up, including list of any outcome data to be collected for participants who discontinue or deviate from intervention protocols                                                                                                                                                                                                                    | <b>10</b>    |
| 50 |                                                                     |     |                                                                                                                                                                                                                                                                                                                                                                                                              |              |
| 51 |                                                                     |     |                                                                                                                                                                                                                                                                                                                                                                                                              |              |
| 52 |                                                                     |     |                                                                                                                                                                                                                                                                                                                                                                                                              |              |
| 53 |                                                                     |     |                                                                                                                                                                                                                                                                                                                                                                                                              |              |
| 54 | Data management                                                     | 19  | Plans for data entry, coding, security, and storage, including any related processes to promote data quality (eg, double data entry; range checks for data values). Reference to where details of data management procedures can be found, if not in the protocol                                                                                                                                            | <b>16</b>    |
| 55 |                                                                     |     |                                                                                                                                                                                                                                                                                                                                                                                                              |              |
| 56 |                                                                     |     |                                                                                                                                                                                                                                                                                                                                                                                                              |              |
| 57 |                                                                     |     |                                                                                                                                                                                                                                                                                                                                                                                                              |              |
| 58 |                                                                     |     |                                                                                                                                                                                                                                                                                                                                                                                                              |              |
| 59 |                                                                     |     |                                                                                                                                                                                                                                                                                                                                                                                                              |              |
| 60 |                                                                     |     |                                                                                                                                                                                                                                                                                                                                                                                                              |              |

|    |                                 |     |                                                                  |              |
|----|---------------------------------|-----|------------------------------------------------------------------|--------------|
| 1  |                                 |     |                                                                  |              |
| 2  | Statistical                     | 20a | Statistical methods for analysing primary and secondary          | <b>12-15</b> |
| 3  | methods                         |     | outcomes. Reference to where other details of the statistical    |              |
| 4  |                                 |     | analysis plan can be found, if not in the protocol               |              |
| 5  |                                 |     |                                                                  |              |
| 6  |                                 | 20b | Methods for any additional analyses (eg, subgroup and            | <b>12-15</b> |
| 7  |                                 |     | adjusted analyses)                                               |              |
| 8  |                                 |     |                                                                  |              |
| 9  |                                 | 20c | Definition of analysis population relating to protocol non-      | <b>12-15</b> |
| 10 |                                 |     | adherence (eg, as randomised analysis), and any statistical      |              |
| 11 |                                 |     | methods to handle missing data (eg, multiple imputation)         |              |
| 12 |                                 |     |                                                                  |              |
| 13 |                                 |     |                                                                  |              |
| 14 | <b>Methods: Monitoring</b>      |     |                                                                  |              |
| 15 |                                 |     |                                                                  |              |
| 16 | Data monitoring                 | 21a | Composition of data monitoring committee (DMC); summary          | <b>NA</b>    |
| 17 |                                 |     | of its role and reporting structure; statement of whether it is  |              |
| 18 |                                 |     | independent from the sponsor and competing interests; and        |              |
| 19 |                                 |     | reference to where further details about its charter can be      |              |
| 20 |                                 |     | found, if not in the protocol. Alternatively, an explanation of  |              |
| 21 |                                 |     | why a DMC is not needed                                          |              |
| 22 |                                 |     |                                                                  |              |
| 23 |                                 |     |                                                                  |              |
| 24 |                                 | 21b | Description of any interim analyses and stopping guidelines,     | <b>13</b>    |
| 25 |                                 |     | including who will have access to these interim results and      |              |
| 26 |                                 |     | make the final decision to terminate the trial                   |              |
| 27 |                                 |     |                                                                  |              |
| 28 | Harms                           | 22  | Plans for collecting, assessing, reporting, and managing         | <b>16-17</b> |
| 29 |                                 |     | solicited and spontaneously reported adverse events and          |              |
| 30 |                                 |     | other unintended effects of trial interventions or trial conduct |              |
| 31 |                                 |     |                                                                  |              |
| 32 |                                 |     |                                                                  |              |
| 33 | Auditing                        | 23  | Frequency and procedures for auditing trial conduct, if any,     | <b>NA</b>    |
| 34 |                                 |     | and whether the process will be independent from                 |              |
| 35 |                                 |     | investigators and the sponsor                                    |              |
| 36 |                                 |     |                                                                  |              |
| 37 |                                 |     |                                                                  |              |
| 38 | <b>Ethics and dissemination</b> |     |                                                                  |              |
| 39 |                                 |     |                                                                  |              |
| 40 | Research ethics                 | 24  | Plans for seeking research ethics committee/institutional        | <b>16</b>    |
| 41 | approval                        |     | review board (REC/IRB) approval                                  |              |
| 42 |                                 |     |                                                                  |              |
| 43 | Protocol                        | 25  | Plans for communicating important protocol modifications         | <b>NA</b>    |
| 44 | amendments                      |     | (eg, changes to eligibility criteria, outcomes, analyses) to     |              |
| 45 |                                 |     | relevant parties (eg, investigators, REC/IRBs, trial             |              |
| 46 |                                 |     | participants, trial registries, journals, regulators)            |              |
| 47 |                                 |     |                                                                  |              |
| 48 | Consent or                      | 26a | Who will obtain informed consent or assent from potential        | <b>16</b>    |
| 49 | assent                          |     | trial participants or authorised surrogates, and how (see        |              |
| 50 |                                 |     | Item 32)                                                         |              |
| 51 |                                 |     |                                                                  |              |
| 52 |                                 |     |                                                                  |              |
| 53 |                                 | 26b | Additional consent provisions for collection and use of          | <b>NA</b>    |
| 54 |                                 |     | participant data and biological specimens in ancillary           |              |
| 55 |                                 |     | studies, if applicable                                           |              |
| 56 |                                 |     |                                                                  |              |
| 57 |                                 |     |                                                                  |              |
| 58 |                                 |     |                                                                  |              |
| 59 |                                 |     |                                                                  |              |
| 60 |                                 |     |                                                                  |              |

|    |                   |     |                                                                 |           |
|----|-------------------|-----|-----------------------------------------------------------------|-----------|
| 1  |                   |     |                                                                 |           |
| 2  | Confidentiality   | 27  | How personal information about potential and enrolled           | <b>16</b> |
| 3  |                   |     | participants will be collected, shared, and maintained in       |           |
| 4  |                   |     | order to protect confidentiality before, during, and after the  |           |
| 5  |                   |     | trial                                                           |           |
| 6  |                   |     |                                                                 |           |
| 7  | Declaration of    | 28  | Financial and other competing interests for principal           | <b>18</b> |
| 8  | interests         |     | investigators for the overall trial and each study site         |           |
| 9  |                   |     |                                                                 |           |
| 10 | Access to data    | 29  | Statement of who will have access to the final trial dataset,   | <b>17</b> |
| 11 |                   |     | and disclosure of contractual agreements that limit such        |           |
| 12 |                   |     | access for investigators                                        |           |
| 13 |                   |     |                                                                 |           |
| 14 |                   |     |                                                                 |           |
| 15 | Ancillary and     | 30  | Provisions, if any, for ancillary and post-trial care, and for  | <b>17</b> |
| 16 | post-trial care   |     | compensation to those who suffer harm from trial                |           |
| 17 |                   |     | participation                                                   |           |
| 18 |                   |     |                                                                 |           |
| 19 | Dissemination     | 31a | Plans for investigators and sponsor to communicate trial        | <b>17</b> |
| 20 | policy            |     | results to participants, healthcare professionals, the public,  |           |
| 21 |                   |     | and other relevant groups (eg, via publication, reporting in    |           |
| 22 |                   |     | results databases, or other data sharing arrangements),         |           |
| 23 |                   |     | including any publication restrictions                          |           |
| 24 |                   |     |                                                                 |           |
| 25 |                   |     |                                                                 |           |
| 26 |                   | 31b | Authorship eligibility guidelines and any intended use of       | <b>NA</b> |
| 27 |                   |     | professional writers                                            |           |
| 28 |                   |     |                                                                 |           |
| 29 |                   | 31c | Plans, if any, for granting public access to the full protocol, | <b>17</b> |
| 30 |                   |     | participant-level dataset, and statistical code                 |           |
| 31 |                   |     |                                                                 |           |
| 32 |                   |     |                                                                 |           |
| 33 | <b>Appendices</b> |     |                                                                 |           |
| 34 |                   |     |                                                                 |           |
| 35 | Informed consent  | 32  | Model consent form and other related documentation given        | <b>NA</b> |
| 36 | materials         |     | to participants and authorised surrogates                       |           |
| 37 |                   |     |                                                                 |           |
| 38 | Biological        | 33  | Plans for collection, laboratory evaluation, and storage of     | <b>NA</b> |
| 39 | specimens         |     | biological specimens for genetic or molecular analysis in the   |           |
| 40 |                   |     | current trial and for future use in ancillary studies, if       |           |
| 41 |                   |     | applicable                                                      |           |
| 42 |                   |     |                                                                 |           |
| 43 |                   |     |                                                                 |           |

---

\*It is strongly recommended that this checklist be read in conjunction with the SPIRIT 2013 Explanation & Elaboration for important clarification on the items. Amendments to the protocol should be tracked and dated. The SPIRIT checklist is copyrighted by the SPIRIT Group under the Creative Commons "[Attribution-NonCommercial-NoDerivs 3.0 Unported](https://creativecommons.org/licenses/by-nc-nd/3.0/)" license.



# BMJ Open

## Protocol for the Healing After Loss (HeAL) Study: A randomized controlled trial of interpersonal psychotherapy (IPT) for major depression following perinatal loss

|                                 |                                                                                                                                                                                                                                                                                                                                                                                                                                                                                                                                                                                                                                                                                                                                      |
|---------------------------------|--------------------------------------------------------------------------------------------------------------------------------------------------------------------------------------------------------------------------------------------------------------------------------------------------------------------------------------------------------------------------------------------------------------------------------------------------------------------------------------------------------------------------------------------------------------------------------------------------------------------------------------------------------------------------------------------------------------------------------------|
| Journal:                        | <i>BMJ Open</i>                                                                                                                                                                                                                                                                                                                                                                                                                                                                                                                                                                                                                                                                                                                      |
| Manuscript ID                   | bmjopen-2021-057747.R1                                                                                                                                                                                                                                                                                                                                                                                                                                                                                                                                                                                                                                                                                                               |
| Article Type:                   | Protocol                                                                                                                                                                                                                                                                                                                                                                                                                                                                                                                                                                                                                                                                                                                             |
| Date Submitted by the Author:   | 14-Jan-2022                                                                                                                                                                                                                                                                                                                                                                                                                                                                                                                                                                                                                                                                                                                          |
| Complete List of Authors:       | Johnson, Jennifer; Michigan State University College of Human Medicine, OBGYN<br>Price, Ann B.; Warren Alpert Medical School of Brown University, Department of Psychiatry<br>Sikorskii, Alla; Michigan State University College of Osteopathic Medicine, Department of Psychiatry<br>Key, Kent; Michigan State University College of Human Medicine<br>Taylor, Brandon; Michigan State University College of Human Medicine<br>Lamphere, Susan; Michigan State University College of Human Medicine<br>Huff, Christine; Michigan State University College of Human Medicine<br>Cinader, Morgan; Michigan State University College of Human Medicine<br>Zlotnick, Caron; Butler Hospital; Women and Infants Hospital of Rhode Island |
| <b>Primary Subject Heading</b>: | Mental health                                                                                                                                                                                                                                                                                                                                                                                                                                                                                                                                                                                                                                                                                                                        |
| Secondary Subject Heading:      | Obstetrics and gynaecology, General practice / Family practice                                                                                                                                                                                                                                                                                                                                                                                                                                                                                                                                                                                                                                                                       |
| Keywords:                       | Depression & mood disorders < PSYCHIATRY, Adult psychiatry < PSYCHIATRY, Maternal medicine < OBSTETRICS                                                                                                                                                                                                                                                                                                                                                                                                                                                                                                                                                                                                                              |
|                                 |                                                                                                                                                                                                                                                                                                                                                                                                                                                                                                                                                                                                                                                                                                                                      |

SCHOLARONE™  
Manuscripts

1  
2  
3 Running Head: PERINATAL LOSS  
4  
5  
6

7 Protocol for the Healing After Loss (HeAL) Study: A randomized controlled trial of  
8 interpersonal psychotherapy (IPT) for major depression following perinatal loss  
9

10  
11 Jennifer E. Johnson, Michigan State University College of Human Medicine, 200 East 1<sup>st</sup> St, Flint,  
12 MI 48503, USA. JJohns@msu.edu  
13  
14

15  
16 Ann B. Price, Department of Psychiatry and Human Behavior, Alpert Medical School of Brown  
17 University, 700 Butler Ave, Providence, RI 02906, USA. Ann\_Back\_Price@brown.edu  
18  
19

20  
21 Alla Sikorskii, Michigan State University College of Osteopathic Medicine, Department of  
22 Psychiatry, 909 Wilson Rd, East Lansing, MI 48824, USA. Sikorska@msu.edu  
23  
24

25  
26 Kent D. Key, Michigan State University College of Human Medicine, 200 East 1<sup>st</sup> St, Flint, MI  
27 48503, USA. KeyKent@msu.edu  
28

29  
30 Brandon Taylor, Michigan State University College of Human Medicine, 200 East 1<sup>st</sup> St, Flint, MI  
31 48503, USA. Tay11214@msu.edu  
32

33  
34 Susan Lamphere, Michigan State University College of Human Medicine, 200 East 1<sup>st</sup> St, Flint,  
35 MI 48503, USA. Lamphe14@msu.edu  
36  
37

38  
39 Christine Huff, Michigan State University College of Human Medicine, 200 East 1<sup>st</sup> St, Flint, MI  
40 48503, USA. HuffChr5@msu.edu  
41

42  
43 Morgan Cinader, Michigan State University College of Human Medicine, 200 East 1<sup>st</sup> St, Flint,  
44 MI 48503, USA. CinaderM@msu.edu  
45

46  
47 Caron Zlotnick, Butler Hospital and Women and Infants Hospital, 345 Blackstone Blvd,  
48 Providence, RI 02906, USA. University of Cape Town, Cape Town, South Africa.  
49 Caron\_Zlotnick@brown.edu  
50  
51

52  
53 Corresponding Author: Jennifer E. Johnson, Michigan State University College of Human  
54 Medicine, 200 East 1<sup>st</sup> St, Flint, MI 48503, USA. JJohns@msu.edu  
55  
56  
57  
58  
59  
60

## Abstract

**Introduction.** This protocol describes a study testing the efficacy of interpersonal psychotherapy (IPT) for major depressive disorder following perinatal loss (early and late fetal death and early neonatal death). Perinatal loss is associated with elevated risk of major depressive disorder and posttraumatic stress disorder (PTSD). Perinatal loss conveys specific treatment needs. The trial will be the first fully-powered randomized trial of treatment for any psychiatric disorder following perinatal loss.

**Methods and analysis.** A sample of 274 women in Flint and Detroit areas in Michigan who experience a major depressive episode following a perinatal loss will be randomized to group IPT for perinatal loss or to group Coping with Depression (CWD). We anticipate that 50% of the sample will have co-occurring PTSD. Assessments occur at baseline, mid-treatment (8 weeks), post-treatment (16 weeks), and follow-up (28 weeks). Clinical outcomes include time to recovery from major depressive episode (primary), depressive symptoms, PTSD symptoms, and time to recovery from PTSD. Additional outcomes include social support, social role functioning (including parental functioning for those with living children), well-being, grief (including complicated grief and fault beliefs), and fear of subsequent pregnancies. Social support and grief are hypothesized mediators of IPT effects on time to recovery from major depressive episode.

**Ethics and dissemination.** The trial was approved by Michigan State University's Biomedical Institutional Review Board. It has a Data and Safety Monitoring Board and has been submitted to the Community Based Organization Partners Community Ethics Review Board. Written operating procedures outline methods for protecting confidentiality, monitoring and recording adverse events, and safeguarding participants. We will share study results with research and clinical communities, community organizations through which we recruited, and will offer results to study

1  
2  
3 participants. De-identified datasets will be available through the National Institute of Mental  
4  
5 Health Data Archive and to qualified investigators upon request.  
6  
7  
8  
9

10 **Clinical trials registration.** The trial was registered at [clinicaltrials.gov](https://clinicaltrials.gov) (NCT04629599).  
11

12 **Key words:** Miscarriage, stillbirth, fetal death, perinatal death, major depressive disorder,  
13  
14 posttraumatic stress disorder, interpersonal psychotherapy.  
15

16 **Word count:** 4,000  
17  
18  
19  
20  
21

### 22 **Article Summary: Strengths and limitations of this study**

- 23  
24 • This study addresses a clinical need, and will provide an evidence base for treating a n  
25  
26 understudied population whose distress has historically been minimized.  
27
- 28  
29 • The trial will have strong representation from disparities populations (especially African  
30  
31 American women and socioeconomically disadvantaged women) who experience higher  
32  
33 rates of perinatal loss, increasing its significance.  
34
- 35  
36 • Rigor and reproducibility are ensured by the randomized design, clear inclusion criteria,  
37  
38 use of well-established research, recruitment, and retention methods, use of reliable and  
39  
40 valid measures, the use of raters blinded to treatment condition, and transparent power and  
41  
42 statistical analyses.  
43
- 44  
45 • Intervention strengths include clearly distinct treatment conditions, use of manualized  
46  
47 treatment protocols and fidelity assessments, and team members with decades of clinical  
48  
49 experience responding to perinatal loss.  
50
- 51  
52 • Challenges may include recruitment during a global pandemic in communities with a  
53  
54 higher levels of research mistrust and more mental health stigma than in the pilot trial.  
55  
56  
57  
58  
59  
60

## Introduction

1  
2  
3  
4  
5  
6 About 650,000 women in the United States experience perinatal loss each year (including  
7 early and late fetal death and the death of a liveborn neonate within the first 28 days).<sup>1 2</sup> Rates of  
8 major depressive disorder (MDD) after perinatal loss are higher than after giving birth to a living  
9 infant, and are 3 times the rates among matched samples of community women.<sup>3-20</sup> Rates of  
10 posttraumatic stress disorder (PTSD) after perinatal loss are up to 7 times the rates of PTSD among  
11 mothers of living infants,<sup>13</sup> and elevated PTSD symptoms can occur for years after the loss.<sup>21</sup> Fetal  
12 or neonatal death triples rates of suicide and of hospitalization for suicide attempts.<sup>22 23</sup>

13  
14  
15  
16  
17  
18  
19  
20  
21  
22 Not only do women with perinatal loss have higher rates of MDD and PTSD than mothers  
23 of living infants, their needs also differ from needs following many other kinds of bereavement.  
24 In perinatal loss, the fact of bereavement is compounded by the physical experience of miscarriage  
25 or of delivering a baby that has already died.<sup>24</sup> Many women experiencing perinatal loss grieve in  
26 secret, as others may not know about the loss. Even if others do know, there are few social norms  
27 that guide how others can or should support the bereaved, making support less likely and often  
28 less helpful (e.g., “you can just have another one”).<sup>12 25</sup> Reasons for loss are often unclear and  
29 many women blame themselves.

30  
31  
32  
33  
34  
35  
36  
37  
38  
39  
40 Despite recognition that MDD (with or without co-occurring PTSD) following perinatal  
41 loss causes impairment and that treatment as usual is often inadequate,<sup>26-30</sup> our previous pilot  
42 work<sup>31</sup> created and tested the first manual for treating any psychiatric disorder after perinatal loss.  
43  
44  
45  
46  
47  
48  
49  
50  
51  
52  
53  
54  
55  
56  
57  
58  
59  
60 The manual is structured and applies interpersonal psychotherapy (IPT) principles to MDD  
following perinatal loss in a group format. Previous IPT and other treatment manuals for perinatal  
depression<sup>32-35</sup> focus on helping women adjust their relationships, identity, roles, and routines to  
the demands of a new baby. This is inappropriate in the context of perinatal loss. Our manual

1  
2  
3 applies IPT social support and communication principles to issues such as resolving conflicts over  
4  
5 how to respond to the loss, grieving and requesting support in the absence of social norms about  
6  
7 how to do so, and resolving questions of fault and role competence. It can be used by providers  
8  
9 who do not know IPT. A randomized pilot trial of women experiencing MDD following perinatal  
10  
11 loss established acceptability of proposed study procedures and identified high rates of co-  
12  
13 occurring PTSD (54%) among study participants.<sup>31</sup> Results favored the new IPT manual for PTSD  
14  
15 recovery, treatment satisfaction, depressive symptoms, grief, and social support relative to Coping  
16  
17 with Depression (CWD), a cognitive-behavioral based intervention that does not focus on perinatal  
18  
19 loss, interpersonal issues, or social support.<sup>31</sup>  
20  
21  
22  
23

24 Based on those promising results, the current study will be the first fully-powered  
25  
26 randomized trial of treatment for any psychiatric disorder following perinatal loss. We will  
27  
28 compare our group IPT manual to a general group depression treatment (CWD) in a sample of 274  
29  
30 women experiencing MDD in the context of perinatal loss. The trial will test the hypotheses that:  
31  
32

- 33 1. IPT for perinatal loss will result in reduced time to recovery from MDD (primary),  
34  
35 depressive symptoms, and PTSD symptoms, relative to CWD. Among women meeting  
36  
37 criteria for PTSD, IPT will result in reduced time to recovery from PTSD relative to CWD.  
38  
39
- 40 2. IPT for perinatal loss will result in increased social support, social role functioning  
41  
42 (including parental functioning for women with living children), and well-being, and  
43  
44 decreased grief and fear of subsequent pregnancies, relative to CWD.  
45  
46
- 47 3. Social support and grief will mediate the effects of IPT on time to MDD recovery.  
48

49 This trial will provide an evidence base for treating a vulnerable and understudied population  
50  
51 whose distress has historically been minimized. Given that poverty increases risk of perinatal  
52  
53 loss,<sup>36-38</sup> and doubles the risk of perinatal depression,<sup>39-47</sup> and that rates of perinatal loss for  
54  
55  
56  
57  
58  
59

1  
2  
3 African-American women are double those for white women,<sup>48-50</sup> the location of the trial in  
4 Southeast Michigan, which includes Flint and Detroit (minority-majority cities with high rates of  
5 poverty), increases the trial's significance.  
6  
7  
8

## 9 10 **Methods and analysis**

### 11 12 **Patient and public involvement**

13  
14 Research questions arose from a clinical need identified by provider colleagues. Patients  
15 provided feedback on treatments, measures, and study procedures in the pilot trial.<sup>31</sup> Local  
16 minority-led community-based organizations provided feedback on measures, procedures, and  
17 recruitment methods appropriate for the Flint and Detroit areas. The study team is embedded in  
18 Flint and Detroit. Team members have lived experience. The trial has been submitted for voluntary  
19 review by the Flint-based Community Based Organization Partners Community Ethics Review  
20 Board for additional community feedback.<sup>51</sup>  
21  
22  
23  
24  
25  
26  
27  
28  
29

### 30 31 **Rationale for design**

32  
33 Given that no other treatment exists for women who experience perinatal-loss related MDD  
34 that could be used as a comparator condition, we chose to use a general depression treatment, the  
35 Coping With Depression (CWD) course, as a control condition. We chose CWD because it is the  
36 group treatment with the most empirical support for treating MDD<sup>52 53</sup> and because it is distinct  
37 from IPT. IPT addresses MDD through emotional exploration, work on relationships,  
38 communication, grief, and social support. CWD addresses MDD by changing thinking and  
39 behavior; it focuses on skills for reducing depression in general and does not have perinatal-loss  
40 specific components. Our IPT treatment differs from CWD in its focus on exploring reactions to  
41 the loss, addressing loss-related interpersonal challenges, and improving loss-related social  
42 support and grief-specific coping. The trial's secondary outcomes (social support, social  
43  
44  
45  
46  
47  
48  
49  
50  
51  
52  
53  
54  
55  
56  
57  
58  
59  
60

1  
2  
3 functioning, grief) assess hypothesized differences between treatments. As desired, our pilot study  
4 found differences between conditions in the hypothesized mechanisms of social support and grief  
5 and in terms of in-session activities.<sup>31</sup>  
6  
7  
8

## 9 10 **Treatments**

11  
12 Manualized treatments are attention-matched (12 groups of 90 minutes each, 1 individual  
13 pre-group session, and 1 booster session). Every 4 weeks, both treatments allow new women to  
14 enter the group and women completing 12 weeks to leave the group.  
15  
16  
17

18  
19 **Interpersonal psychotherapy (IPT).** Participants in the IPT condition receive 12 group  
20 sessions and 2 individual (pre-group and 1-month booster) sessions as outlined in the structured  
21 manual (see Table 1 and pilot trial<sup>31</sup>). The individual sessions prepare patients to use the group  
22 effectively, to keep group members focused on their treatment goals, and to maintain treatment  
23 gains. In addition, 3 of the 12 group sessions invite women to include their partners or other  
24 support people to bolster the woman's social support system and to reduce conflicts over how to  
25 react to the loss. Relationship distress is common following perinatal loss.<sup>12 54</sup>  
26  
27  
28  
29  
30  
31  
32  
33  
34

35  
36 Group sessions are semi-structured, and each woman covers the four group topics listed in  
37 Table 1 three times over her 12 group sessions, approaching each topic from a different stage in  
38 the mourning process. New women are allowed to enter group every four sessions. This allows  
39 remaining women to see their own progress and encourages new women through example and  
40 peer counseling.  
41  
42  
43  
44  
45

46  
47 **Coping with Depression (CWD).** CWD is a structured, manualized<sup>55</sup> psycho-educational  
48 group treatment for MDD. The CWD course is cognitive-behavioral. The problems shown by  
49 depressed individuals are viewed as behavioral, with cognitive patterns that can be unlearned or  
50 relearned. Its effectiveness is comparable to other forms of psychotherapy in depression.<sup>53</sup> The  
51  
52  
53  
54  
55  
56  
57  
58  
59  
60



1  
2  
3 course content teaches skills including relaxation, cognitive skills, and behavioral activation. The  
4  
5 CWD pre-group and booster sessions are the pre-group and booster sessions from the published  
6  
7 CWD manual<sup>55</sup>. To ensure that the CWD intervention was distinct from IPT, we excluded the 2  
8  
9 sessions on social skills and emphasized pleasant activities that were individual rather than social.  
10  
11 Consistent with standard CWD, we focused on addressing depression rather than discussing grief  
12  
13 or perinatal loss. We expanded other CWD material (e.g., relaxation practice) to replace sessions  
14  
15 on social skills. In our studies, the 12 CWD sessions covered: an introduction to social learning  
16  
17 rationale of depression; learning to relax; relaxation in everyday situations; pleasant activities and  
18  
19 depression; formulating a pleasant activities plan; constructive thinking; planning for constructive  
20  
21 thinking; and maintaining gains (see published manual<sup>55</sup> and pilot trial<sup>31</sup> for additional details).  
22  
23  
24  
25

## 26 **Participants**

27  
28 Participants will be 274 women who are experiencing MDD in the context of perinatal loss  
29  
30 who (1) meet DSM-5<sup>56</sup> criteria for MDD; (2) have experienced a perinatal loss (including early  
31  
32 and late fetal death, death of a liveborn neonate within the first 28 days, and medically  
33  
34 recommended termination) within the last 1-12 months; (3) are 18 to 50 years old; (4) speak and  
35  
36 understand English well enough to understand questionnaires when they are read aloud; (5) can  
37  
38 provide the name and contact information of at least two locator persons; and (6) have access to a  
39  
40 telephone. Exclusion criteria are: (1) onset of *current* major depressive episode prior to news of  
41  
42 difficulties with the pregnancy or health risk to the infant (women with prior episodes are included);  
43  
44 (2) current or past diagnosis of bipolar disorder, schizophrenia or other psychotic disorder; (3)  
45  
46 primary diagnosis of current substance use disorder; (4) acute suicidal or homicidal risk; (5)  
47  
48 beginning or changing dose of antidepressant medication or psychotherapy in the previous 12  
49  
50 weeks); (6) any IPT or cognitive-behavioral treatment in the previous 12 weeks. Women in stable  
51  
52  
53  
54  
55  
56  
57  
58  
59  
60

1  
2  
3 concurrent psychotherapy who are included are asked to suspend this treatment during the active  
4 study treatment phase. PTSD is not an inclusion criterion. However, based on our pilot,<sup>31</sup> we  
5 anticipate that slightly more than half the sample will meet criteria for PTSD at study enrollment.  
6  
7

### 8 9 10 **Therapist training and supervision**

11  
12 We trained 8 study therapists (4 in IPT and 4 in CWD) who are MSWs or clinical or  
13 counseling psychologists. Therapists are recruited from their respective communities to moonlight  
14 as clinicians in this proposed study. Therapists are provided with the detailed treatment manuals.  
15  
16 Training for both conditions includes education and role plays. Therapists in both conditions will  
17 be monitored for adherence/competence throughout the study and retrained as needed.  
18  
19

20  
21 Supervision involves review of therapists' audiotaped sessions and a weekly one-hour  
22 small-group telephone meeting for feedback and case discussion. Treatment sessions are audio  
23 recorded using digital audio recorders or a HIPAA-compliant version of Zoom. Study therapists  
24 remotely upload the recordings to the study's secure research server, where the supervisors can  
25 remotely access them.  
26  
27

### 28 29 30 **Randomization**

31  
32 Women are randomly assigned to IPT or CWD in a 1:1 ratio. We stratify randomization  
33 on (1) whether women have been taking antidepressant medications or attending other  
34 psychotherapy (stability of dose is an inclusion criterion); and (2) type of perinatal loss  
35 (miscarriage, stillbirth, neonatal death). Randomization sequences were created by the study  
36  
37  
38  
39  
40  
41  
42  
43  
44  
45  
46  
47  
48  
49  
50  
51  
52  
53  
54  
55  
56  
57  
58  
59  
60

### 51 52 53 **Recruitment**

54  
55 Participants are recruited from counties in Southeast Michigan using a broad outreach  
56  
57  
58  
59  
60

1  
2  
3 Detroit, and a regional Medicaid system in study recruitment. Recruitment also includes flyers  
4 and referrals from: (1) local birthing centers, emergency departments, OBGYN offices, and  
5  
6  
7  
8 federally qualified health centers; (2) hotlines, support groups, family nurse partnerships; (3)  
9  
10 funeral homes; (4) churches, daycare centers, other places where women and mothers congregate  
11  
12 (WIC offices, Medicaid offices, etc.); (5) bus ads; and (6) online venues. We began recruitment  
13  
14 on September 1, 2021 and plan to end on March 1, 2025.  
15

### 16 17 **Research sites**

18  
19 We had planned to offer baseline assessments at women's homes or our offices, group  
20  
21 sessions in community locations convenient for participants (as we did in the pilot trial),<sup>31</sup> and to  
22  
23  
24 conduct follow-up assessments by telephone. However, due to the COVID-19 pandemic, we are  
25  
26 currently conducting all assessments and treatment sessions by Zoom, with an option to go back  
27  
28 to holding groups in person in the future.  
29

### 30 31 **Retention**

32  
33 We employ techniques we have found helpful in achieving low attrition rates in previous  
34  
35 studies.<sup>31 57-59</sup> These include study staff's strong relationships with participants, efforts to value  
36  
37 and appreciate the women's participation in the study, and frequent personal contact. We are  
38  
39 flexible about follow-up appointment scheduling and train research staff to be culturally sensitive.  
40  
41 Follow-up assessments take place by Zoom or phone, with well-established safety procedures for  
42  
43 emergencies.<sup>57</sup> We maintain a list of two other people who know where the participant resides.  
44  
45 We conduct treatment groups at different times and locations to make attendance easier. If a  
46  
47 woman misses a treatment appointment, the therapist calls her to check in and problem-solve  
48  
49 barriers to attendance. Finally, participant fees for follow-up assessments help facilitate retention.  
50  
51  
52

### 53 54 **Assessments**

1  
2  
3 Assessments take place at baseline, mid-treatment (8 weeks), post-treatment (16 weeks),  
4 and follow-up (28 weeks; see Table 2). Assessments are conducted by research assistants (RAs)  
5 trained and certified in interviewer administered instruments and blind to treatment assignment.  
6 Interviewers and senior staff meet regularly to review assessment tapes, address questions, and  
7 monitor inter-rater reliability. Data quality is maintained through clerical and clinical checks after  
8 data are entered and through regular examination of distributions, missing data, and outliers.  
9

10  
11  
12 **Diagnosis/screening.** The Structured Clinical Interview for DSM-5 (SCID-5)<sup>60</sup> is used to  
13 establish study eligibility. During follow-up, the Longitudinal Interval Follow-up Examination  
14 (LIFE),<sup>61 62</sup> a standardized retrospective calendar-based interview, is used to assess MDD and  
15 PTSD recovery. The LIFE uses Psychiatric Status Ratings (PSRs) to categorize DSM-5 symptoms  
16 on a scale of 1 (asymptomatic) to 6 (incapacitated) for each week. A PSR of 5 or 6 indicates the  
17 participant meets full diagnostic criteria, 3 or 4 indicates subthreshold disorder, and 1 or 2 indicates  
18 the participant is not in episode. Recovery is defined as 8 consecutive weeks of a PSR of 1-2.<sup>63</sup>  
19 The LIFE is the gold-standard way of determining onset and offset of psychiatric disorder.<sup>63</sup> We  
20 also use the LIFE to track participation in psychotherapeutic and psychopharmacologic treatment  
21 at baseline and follow-up. We assess partner violence using the Women's Experience with  
22 Battering screen.<sup>64</sup> Battered women (scores of 20+) are included in the study and provided with  
23 partner violence resources.  
24  
25

26  
27 **Depressive symptoms** are assessed using the Quick Inventory of Depressive Symptoms  
28 (QIDS), Self-Report version.<sup>65</sup>  
29

30  
31 **PTSD symptoms** are assessed using the Life Events Checklist and PTSD Checklist for  
32 DSM-5 (LEC-PCL).<sup>66-69</sup> We also assess whether PTSD symptoms are related to the perinatal loss.  
33

34  
35 **Social support and social functioning.** We use the 12-item Multidimensional Scale for  
36  
37  
38  
39  
40  
41  
42  
43  
44  
45  
46  
47  
48  
49  
50  
51  
52  
53

1  
2  
3 Perceived Social Support (MSPSS)<sup>70</sup> to assess overall social support. We use a validated  
4  
5 adaptation of the Relationship Assessment Scale<sup>71</sup> to assess satisfaction with an important  
6  
7 significant other (partner or other support person of the woman's choosing) relationship. We assess  
8  
9 social functioning using the Short version of the Social Adjustment Scale – Self-Report (SAS-  
10  
11 SR).<sup>72</sup> Because depression can affect parenting, we will analyze the SAS-SR total score as well as  
12  
13 its parental functioning subscale.  
14  
15

16  
17 **Well-being** (including life satisfaction, purpose and meaning) is measured by using the 23-  
18  
19 item Neuro-QoL scale for positive affect and well-being.<sup>73</sup>  
20

21 **Grief** symptoms are measured using the Perinatal Bereavement Grief Scale (PBGS).<sup>4 74</sup>  
22  
23 Complicated grief is measured using the Inventory of Complicated Grief (ICG).<sup>75</sup> A few items on  
24  
25 the ICG were reworded to refer to perinatal loss. Given that many women present with unwarranted  
26  
27 beliefs about what caused the loss, we assess deservingness and guilt as grief outcomes using a 7-  
28  
29 item scale about loss beliefs (the Loss Beliefs Scale). This scale includes items such as “I think  
30  
31 what happened was my fault” and “The miscarriage, stillbirth, or baby's death was caused by  
32  
33 something about me.” This perinatal loss specific scale was created after reviewing the literature  
34  
35 on beliefs about deserved bad outcomes (e.g.,<sup>76-78</sup>).  
36  
37  
38  
39

40 **Fear of subsequent pregnancies** is assessed by 7-point Likert items (from 1 = Strongly  
41  
42 Disagree” to 7 = “Strongly Agree”): (1) “I am afraid to become pregnant again”; (2) “I look  
43  
44 forward to becoming pregnant again”; (3) “I plan to become pregnant again”; (4) “I worry about  
45  
46 what might happen if I get pregnant again,” (5) “I do not want to be pregnant again.”  
47  
48

49 **Treatment acceptability** is measured using the Client Satisfaction Questionnaire-Revised  
50  
51 (CSQ-8-R).<sup>79</sup>  
52

53  
54 **Treatment integrity.** We will use the IPT and CWD adherence and competence scales  
55  
56  
57  
58  
59  
60

1  
2  
3 developed in the pilot trial<sup>31</sup> to rate fidelity using audio recordings. As in the pilot trial, raters will  
4 also assess the percent of time in each group session spent discussing the perinatal loss and  
5  
6 discussing loss-related communication strategies.<sup>31</sup>  
7  
8  
9

## 10 **Analysis**

11  
12 Primary analyses will be intent-to-treat. We will examine dose-response effects in  
13 secondary analyses. Primary tests will be two-sided with  $p=0.05$ . Descriptive statistics will include  
14 effect sizes and measures of clinical significance.<sup>80</sup> Primary and secondary outcomes and all  
15 hypotheses are stated a priori, therefore 0.05 level of significance will be used. Per Kraemer,<sup>81</sup> we  
16 will not test for differences between conditions due to randomization as those differences are due  
17 to chance alone, rendering p-values meaningless. Covariates for analyses are specified a priori  
18 based on subject matter expertise. No interim analyses are planned.  
19  
20  
21  
22  
23  
24  
25  
26  
27

28 **Attrition analysis and missing data.** We will compare characteristics of those who drop  
29 out by trial arm and compare those who complete the study with those who do not to assess  
30 generalizability of findings. For the primary outcome of time to MDD recovery, unobserved time  
31 to MDD resolution for the drop-outs will be treated as censored. For secondary outcomes,  
32 regression techniques below allow for missing at random (MAR) mechanism.<sup>82</sup> If patterns of  
33 missing data indicate potential not missing at random (NMAR) mechanisms, then models  
34 describing missing mechanisms will be considered (e.g., pattern-mixture models),<sup>83 84</sup> and  
35 sensitivity analyses will be employed.  
36  
37  
38  
39  
40  
41  
42  
43  
44  
45  
46

47 **General approaches.** For survival analyses, the proportional hazard (PH) assumption will  
48 be evaluated. If it holds, then survival analyses will use Cox regression. If not, time-varying  
49 effects will be investigated, and the model will be modified to include an interaction of relevant  
50 covariates with a function of time variable. Stratified models will also be considered.  
51  
52  
53  
54  
55  
56  
57  
58  
59  
60

1  
2  
3  
4  
5  
6  
7  
8  
9  
10  
11  
12  
13  
14  
Linear mixed effects (LME) models will be used to test differences between trial arms for continuous outcomes. All participants with at least one completed post-baseline assessment will be included. We expect these scores to follow normal distributions. However, generalized linear mixed effects (GLME) modeling will be used if outcome is not normally distributed and cannot be normalized using transformations.

15  
16  
17  
18  
19  
20  
21  
22  
23  
24  
25  
26  
27  
28  
29  
30  
31  
32  
33  
34  
**Aim 1.** (1) Using survival analysis, with initial QIDS score as a covariate, we will test the hypothesis that IPT, relative to CWD, will result in reduced time to recovery from the major depressive episode (primary). (2) Using LME or GLME with baseline QIDS score as a covariate, we will test the hypothesis that IPT, relative to CWD, will result in reduced depressive symptoms (QIDS scores) across post-baseline assessments. (3) Using LME or GLME with baseline PCL score as a covariate, we will test the hypothesis that IPT, relative to CWD, will result in reduced PTSD symptoms (PCL score) across post-baseline assessments. (4) Using survival analysis, with initial PCL score as a covariate, we will test the hypothesis that IPT, relative to CWD, will result in reduced time to recovery from PTSD.

35  
36  
37  
38  
39  
40  
41  
42  
43  
44  
45  
46  
47  
48  
49  
50  
51  
52  
53  
**Aim 2.** Using baseline scores as covariates, we will separately test the hypotheses that IPT for perinatal loss will result in increased social support, social role functioning, and well-being, and decreased grief and fear of subsequent pregnancies, relative to CWD, using the LME or GLME modeling described above. Specifically, controlling for baseline values, we will use separate analyses to test the effects of IPT vs. CWD on MSPSS, Relationship Assessment Scale, SAS-SR total, SAS-SR parenting subscale, Neuro-QoL, Perinatal Bereavement Grief Scale, Inventory of Complicated Grief, Loss Belief Scale, and Fear of Subsequent Pregnancy scores. We will also compare conditions on CSQ-8-R Treatment Acceptability.

54  
55  
56  
57  
58  
59  
60  
**Aim 3.** We will test the hypotheses that social support (MSPSS scores) and grief (PBGS

1  
2  
3 scores) will mediate the effects of IPT on time to MDD recovery. To test for mediation, trial arm  
4 will be treated as the independent variable and each potential mediator (one at a time) will be tested  
5  
6 for their effect on the outcome variable at weeks 8, 16, and 28, with the baseline value of that  
7  
8 outcome treated as a covariate. We will use a bias corrected bootstrapping analytic strategy<sup>85 86</sup>  
9  
10 based on 5000 bootstrap samples to estimate confidence intervals (CIs) around the indirect effect  
11  
12 of study group on the outcome variable, through the mediator.  
13  
14  
15

16  
17 **Moderators.** We will calculate differential effect estimates and test the interactions  
18  
19 between several participant characteristics and the intervention effect in predicting time to  
20  
21 recovery from MDD. Characteristics to be examined include race, ethnicity, having living children,  
22  
23 type of perinatal loss, stable use of other antidepressant or psychosocial treatment at baseline,  
24  
25 having PTSD at baseline, having a partner, number of past depressive episodes, and time since  
26  
27 loss. Given our emphasis on meeting the needs of minority women, we will also evaluate whether  
28  
29 mediation relationships or intervention effects on secondary outcomes differ by race.  
30  
31

### 32 33 **Sample size**

34  
35 **Recovery outcomes.** For the primary outcome of time to MDD recovery (censored at 28  
36  
37 weeks), assuming 1:1 allocation, power 0.80, two-sided tests at  $p=0.05$ , and observed estimated  
38  
39 hazard ratio=1.79, the required number of events is 94 (number of MDEs resolved). By week  
40  
41 28, there were 17 events in the preliminary data (17 women had MDD resolved, 11 in the IPT  
42  
43 condition, and 6 in the CWD condition) out of 45 participants, so the rate of events was .38. Thus  
44  
45 to have 94 events, total  $N=246$  is required. Given that 90% of pilot trial participants completed at  
46  
47 least one follow-up assessment,<sup>31</sup> we increased the sample size to 274. Given the observed hazard  
48  
49 ratio of 5.85 for PTSD in the pilot trial, power for PTSD recovery should be greater than 80%.  
50  
51  
52  
53  
54  
55  
56  
57  
58  
59



1  
2  
3 Tests of mediation in Aim 3 will have greater power than the primary outcome because of  
4  
5 reduction in error variance when controlling for the mediator.  
6

7  
8 Continuous (secondary) outcomes. Assuming an unadjusted  $d = .32$  and a correlation of  
9  
10 0.6 between follow-up measures and 0.3 with baseline (as observed in the preliminary data), the  
11  
12 adjusted effect size would be 0.40, and only  $n = 200$  participants would be needed before attrition.  
13  
14 If study attrition is higher, the study still has  $> 80\%$  power for secondary outcomes (Table 3).  
15

### 16 17 **Ethics and Dissemination**

18  
19 The trial was approved by Michigan State University's Biomedical Institutional Review  
20  
21 Board (FWA 00004556). A three-member external Data and Safety Monitoring Board reviews  
22  
23 data and safety of study participants. Trial safety procedures are codified through checklists and  
24  
25 a written manual of operating procedures.  
26  
27

### 28 29 **Informed consent and confidentiality**

30  
31 When potential participants contact the study, study RAs meet with them privately  
32  
33 (electronically or in person). RAs explain risks, benefits, and the voluntary nature of the study and  
34  
35 obtain participants' signed informed consent.  
36

37  
38 Confidentiality is protected by research staff trained to manage sensitive clinical issues.  
39  
40 Participants are informed about the limits of confidentiality concerning suicidal intent, homicidal  
41  
42 intent, and suspected child or elder abuse. Computer files are available only to authorized  
43  
44 personnel, with no names or obvious identifying information stored in data files. Confidentiality  
45  
46 of recordings of study assessments and treatment sessions is protected through: (1) use of  
47  
48 encrypted audio recorders and HIPAA-compliant videoconferencing; (2) labeling recordings with  
49  
50 study IDs rather than names; (3) storing recordings on a secured computer server designed to hold  
51  
52 and protect research data; and (4) limiting access to recordings.  
53  
54  
55  
56  
57  
58  
59  
60

## Participant safety

**Adverse events.** Participant safety is monitored during study assessments and during study treatment sessions. Pre-specified adverse events are recorded and monitored using a structured system created within REDCap with alerts for follow-up actions.<sup>57</sup>

**Suicide risk.** During assessments, participants who score 2 or above (any active suicide ideation) on the QIDS suicide item are transferred via warm handoff to a national suicide hotline contracted for this trial. The suicide hotline assesses suicidality and emergent treatment needs, provides follow-up, and securely transmits a written disposition. This procedure has worked well in previous trials.<sup>57</sup>

**Clinical deterioration.** If a participant develops manic or psychotic symptoms, or if her QIDS score increases by 5+ points from baseline, she is evaluated by an independent clinician to see if she needs to be referred for other treatment and/or removed from the trial.

**Treatment nonresponse.** Women in either condition whose MDD has not remitted by the end of the study (week 28) are referred for other treatment.

## Dissemination policy and access to data

Dissemination activities will include academic papers, presentations to clinical communities, community reports and talks with organizations through which we recruited, and offering to share final study results with study participants. De-identified datasets will be available to qualified investigators upon request.

1  
2  
3 **Author statement. Johnson:** Conceptualization (lead), funding acquisition (lead), investigation  
4 (lead), intervention development (equal), safety protocols (lead), writing – original draft  
5 preparation (lead), writing – review and editing (lead). **Zlotnick:** Conceptualization (supporting),  
6 funding acquisition (supporting), clinical supervision (equal), safety protocols (supporting),  
7 writing – review and editing (supporting). **Price:** Funding acquisition (supporting), intervention  
8 development (equal), clinical supervision (equal). **Sikorskii:** Conceptualization (supporting),  
9 funding acquisition (supporting), data curation, formal analysis. **Key:** Funding acquisition  
10 (supporting), recruitment strategy (supporting). **Lamphere, Taylor, Huff, and Cinader:**  
11 Recruitment strategies (lead), development of operating procedures (supporting), choice of  
12 measures (supporting).  
13  
14  
15  
16  
17  
18  
19  
20  
21  
22  
23  
24  
25

26 **Funding statement.** This work was supported by the Eunice Kennedy Shriver National Institute  
27 of Child Health and Human Development (NICHD) grant number (R01 HD100471). NICHD had  
28 no role in the design of the study and will have no role in the implementation of the study, analysis  
29 of the data, or writing of the manuscript.  
30  
31  
32  
33  
34

35 **Competing interests statement.** The authors have no competing interests.  
36  
37  
38  
39  
40  
41  
42  
43  
44  
45  
46  
47  
48  
49  
50  
51  
52  
53  
54  
55  
56  
57  
58  
59  
60

Table 1

Outline of IPT for major depressive disorder following perinatal loss

| Session name                                    | Session activities                                                                                                                                                                                                                                                                                                                                                                                                                                                                                                                                                                                                                                                                                                                                                                                 |
|-------------------------------------------------|----------------------------------------------------------------------------------------------------------------------------------------------------------------------------------------------------------------------------------------------------------------------------------------------------------------------------------------------------------------------------------------------------------------------------------------------------------------------------------------------------------------------------------------------------------------------------------------------------------------------------------------------------------------------------------------------------------------------------------------------------------------------------------------------------|
| <b>1: Emotions of grief</b>                     | <p>Each woman tells her perinatal loss story and: expresses her feelings at the time of her loss, feels and expresses her current feelings about her loss, elicits support from and supports the other group members.</p> <p>Each woman is guided to: identify current supportive people, select one person to ask for grief support, role-play how to ask for support.</p>                                                                                                                                                                                                                                                                                                                                                                                                                        |
| <b>2: Understanding what happened</b>           | <p>Each woman: explores her understanding of what happened to her pregnancy/baby, explores her thoughts/feelings about fault or blame, explores what the loss means to her, begins to explore who she has talked to about the loss and how she talks to them about her needs, identifies who she will invite to Session 3, role-plays how to communicate this invitation.</p> <p>The therapist: helps each woman unpack and examine whether there was anything she could have done to change the outcome, with support from the group, guides the women to seek information from their OBGYN providers about what does and does not contribute to perinatal loss, guides women to identify additional questions for their providers, helps each woman explore how she makes sense of her loss.</p> |
| <b>3: Grieving with others</b>                  | <p>Each woman is encouraged to invite a support person to the group. The therapist provides psychoeducation about: depression, grieving styles, ways to manage grieving differences, how IPT helps women recover and how partner/family/friend support can help women recover.</p> <p>Next the therapist guides each woman and her support person to: complete a written communication exercise about both partners' loss-related emotional needs, discuss their written answers privately for 20 minutes, discuss as a group what they learned from each other about support, discuss how each pair will manage communication with others in their social network, develop communication homework to improve each pair's support of each other regarding the loss.</p>                            |
| <b>4: Holding the memory and moving forward</b> | <p>Each woman discusses how she: holds the memory/meaning of her loss experience, can re-engage in life roles, seeks support and communication with key people, reflects on her grief process and her recovery from depression.</p> <p>The therapist guides the group by: reminding them that new members are added next week and discussing ways to welcome them, eliciting and role-modeling how to offer well-wishes to and from women completing their group treatment in this session.</p>                                                                                                                                                                                                                                                                                                    |

Table 2

## Schedule of Assessments

| Measure                                         | Baseline | Week 8 | Week 16 | Week 28 |
|-------------------------------------------------|----------|--------|---------|---------|
| <b>Diagnosis and safety</b>                     |          |        |         |         |
| SCID-5                                          | X        |        |         |         |
| Women's Experience with Battering screener      | X        |        |         |         |
| Longitudinal Interval Follow-up Examination     | X        | X      | X       | X       |
| <b>Psychiatric symptoms</b>                     |          |        |         |         |
| Quick Inventory of Depressive Symptoms          | X        | X      | X       | X       |
| Life Events Checklist and PTSD Checklist        | X        | X      | X       | X       |
| <b>Hypothesized mediators</b>                   |          |        |         |         |
| Multidim. Scale of Perceived Social Support     | X        | X      | X       | X       |
| Relationship Assessment Scale                   | X        | X      | X       | X       |
| Social Adjustment Scale total score             | X        | X      | X       | X       |
| Social Adjustment Scale parental functioning    | X        | X      | X       | X       |
| <b>Other outcomes (grief, well-being, fear)</b> |          |        |         |         |
| NIH Neuro-Quality of Life scale                 | X        | X      | X       | X       |
| Perinatal Bereavement Grief Scale               | X        | X      | X       | X       |
| Inventory of Complicated Grief                  | X        | X      | X       | X       |
| Loss Beliefs Scale                              | X        | X      | X       | X       |
| Fear of subsequent pregnancies                  | X        | X      | X       | X       |
| <b>Treatment acceptability of IPT and CWD</b>   |          |        |         |         |
| Client Satisfaction Scale – Revised             |          |        | X       |         |

1  
2  
3  
4  
5  
6  
7  
8  
9  
10  
11  
12  
13  
14  
15  
16  
17  
18  
19  
20  
21  
22  
23  
24  
25  
26  
27  
28  
29  
30  
31  
32  
33  
34  
35  
36  
37  
38  
39  
40  
41  
42  
43  
44  
45  
46  
47  
48  
49  
50  
51  
52  
53  
54  
55  
56  
57  
58  
59  
60

Table 3

Power for n = 274 for secondary outcomes

|               | <i>d</i> = .29 | <i>d</i> = .32 | <i>d</i> = .35 |
|---------------|----------------|----------------|----------------|
| 10% attrition | .81            | <b>.88</b>     | .93            |
| 15% attrition | .74            | .83            | .88            |
| 20% attrition | .72            | .80            | .86            |
| 25% attrition | .69            | .78            | .84            |

For peer review only

## References

1. Armstrong DS. Emotional Distress and Prenatal Attachment in Pregnancy After Perinatal Loss. *Journal of Nursing Scholarship* 2002;34(4):339-45.
2. AmericanPregnancy. 2008 [Available from: [www.americanpregnancy.org/main/statistics.html](http://www.americanpregnancy.org/main/statistics.html) accessed June 2008.
3. Gavin N, Gaynes, BN, Lohr, KN, Meltzer-Brody, S, Gartlehner, G, & Swinson, T. Perinatal depression: A systematic review of prevalence and incidence. *Obstet Gynecol* 2005;106(5 Pt 1):1071-83.
4. Klier CM, Geller PA, Ritsher JB. Affective disorders in the aftermath of miscarriage: A comprehensive review. *Archives of Women's Mental Health* 2002;5(4):129-49.
5. Neugebauer R, Kline J, Shrout P, et al. Major depressive disorder in the 6 months after miscarriage. *JAMA: Journal of the American Medical Association* 1997;277(5):383-88.
6. Lee DTS, Wong CK, Cheung LP, et al. Psychiatric morbidity following miscarriage: A prevalence study of Chinese women in Hong Kong. *Journal of Affective Disorders* 1997;43(1):63-68.
7. Neugebauer R. Depressive symptoms at two months after miscarriage: Interpreting study findings from an epidemiological versus clinical perspective. *Depression and Anxiety Special issue: Anxiety disorders in women* 2003;17(3):152-61.
8. Neugebauer R, Kline J, O'Connor P, et al. Determinants of depressive symptoms in the early weeks after miscarriage. *American Journal of Public Health* 1992a;82(10):1332-39.
9. Neugebauer R, Kline J, O'Conner P, et al. Depressive symptoms in women in the six months after miscarriage. *American Journal of Obstetrics and Gynecology* 1992 b;166(1 Pt 1):104-09.

10. Beutel M, Deckardt, R., von Rad, M., Weiner, H. Grief and depression after miscarriage: Their separation, antecedent, and course. *Psychosomatic Medicine* 1995;57:517-26.
11. Thapar A, Thapar A. Psychological sequelae of miscarriage: a controlled study using the general health questionnaire and the hospital anxiety and depression scale. *British Journal of General Practice* 1992;42:94-96.
12. Stirtzinger RM, Robinson GE, Stewart DE, et al. Parameters of grieving in spontaneous abortion. *International Journal of Psychiatry in Medicine* 1999;29(2):235-49.
13. Gold KJ, Leon, I., Boggs, M. E., Sen, A. Depression and Posttraumatic Stress Symptoms After Perinatal Loss in a Population-Based Sample. *Journal of Women's Health* 2016;25(3):263-69.
14. Boyle FM, Vance JC, Najman JM, et al. The mental health impact of stillbirth, neonatal death or sids: Prevalence and patterns of distress among mothers. *Social Science & Medicine* 1996;43(8):1273-82.
15. Vance JC, Boyle FM, Najman JM, et al. Gender differences in parental psychological distress following perinatal death or sudden infant death syndrome. *British Journal of Psychiatry* 1995;167(6):806-11.
16. Clarke M, Williams AJ. Depression in women after perinatal death. *Lancet* 1979;1:916-17.
17. Carrera L, Diez-Domingo J, Montanana V, et al. Depression in women suffering perinatal loss. *International Journal of Gynecology & Obstetrics* 1998;62:149-53.
18. Janssen HJEM, Cuisinier MCJ, Hoogduin KAL, et al. Controlled prospective study on the mental health of women following pregnancy loss. *American Journal of Psychiatry* 1996;153(2):226-30.



- 1  
2  
3 19. Kulathilaka S, Hanwella, R., de Silva, V. A. Depressive disorder and grief following  
4  
5 spontaneous abortion. *BMC Psychiatry* 2016;16:100.  
6
- 7  
8 20. Wall-Wieler E, Roos, L. L., Bolton, J. Duration of maternal mental health-related outcomes  
9  
10 after an infants death: A retrospective matched cohort study using linkable administrative  
11  
12 data. *Depression and Anxiety* 2018;35:305-12.  
13
- 14  
15 21. Gravensteen IK, Helgadóttir, L. B., Jacobsen, E, Radestad, I., Sandset, P. M., Ekeberg, O.  
16  
17 Women's experiences in relation to stillbirth and risk factors for long-term post-traumatic  
18  
19 stress symptoms: a retrospective study. *BMJ Open* 2013;3:e003323.  
20
- 21  
22 22. Gissler M, Hemminki E, Lonnqvist J. Suicides after pregnancy in Finland, 1987-1994: Register  
23  
24 linkage study. *British Medical Journal* 1996;313(7070):1431-34.  
25
- 26  
27 23. Schiff MA, Grossman DC. Adverse perinatal outcomes and risk for postpartum suicide attempt  
28  
29 in Washington State, 1987-2001. *Pediatrics* 2006;118(3):e669-e75.  
30
- 31  
32 24. Engelhard I, van den Hout, MA, Arntz, A. Posttraumatic stress disorder after pregnancy loss.  
33  
34 *General Hospital Psychiatry* 2001;23(2):62-66.  
35
- 36  
37 25. Nikcevic AV. Development and evaluation of a miscarriage follow-up clinic. *Journal of*  
38  
39 *Reproductive and Infant Psychology* 2003;21(3):207-17.  
40
- 41  
42 26. DiMarco M, Menke, EM, McNamara, T. Evaluating a support group for perinatal loss. *The*  
43  
44 *American Journal of Maternal/Child Nursing* 2001;26(3):135-40.  
45
- 46  
47 27. McCreight B. Perinatal loss: A qualitative study in Northern Ireland. *Journal of Death and*  
48  
49 *Dying* 2008;57(1):1-19.  
50
- 51  
52 28. Conway K. Miscarriage experience and the role of support systems: A pilot study. *British*  
53  
54 *Journal of Medical Psychology* 1995;68(3):259-67.  
55  
56  
57  
58  
59  
60

- 1  
2  
3 29. Brier N. Understanding and managing the emotional reactions to miscarriage. *Obstet Gynecol*  
4  
5 1999;93:151-55.  
6  
7  
8 30. Cordle CJ, Prettyman RJ. A 2-year follow-up of women who have experienced early  
9  
10 miscarriage. *Journal of Reproductive and Infant Psychology* 1994;12(1, Jan-Mar )  
11  
12  
13 31. Johnson J, Price AB, Kao, JC, Fernandes, K. Stout, RL, Gobin, R, Zlotnick, C. Interpersonal  
14  
15 psychotherapy (IPT) for major dpression following perinatal loss: A pilot randomized  
16  
17 controlled trial. *Archives of Women's Mental Health* 2016;19(5):845-59.  
18  
19  
20 32. Crockett K, Zlotnick C, Davis M, et al. A depression preventive intervention for rural low-  
21  
22 income African-American pregnant women at risk for postpartum depression. *Arch*  
23  
24 *Womens Ment Health* 2008;11(5-6):319-25. doi: 10.1007/s00737-008-0036-3 [published  
25  
26 Online First: 2008/11/05]  
27  
28  
29 33. O'Hara MW, Stuart, S., Gorman, L.L., Wenzel, A. Efficacy of Interpersonal Psychotherapy for  
30  
31 Postpartum Depression. *Archives of General Psychiatry* 2000;57(11):1039-45.  
32  
33  
34 34. Ramezani S, Khosravi, A., Motaghi, Z., Hamidzadeh, A., Mousavi, S. A. The effect of  
35  
36 cognitive-behavioural and solution-focused counselling on prevention of postpartum  
37  
38 depression in nulliparous pregnant women. *Journal of Reproductive and Infant Psychology*  
39  
40 2017;35(2):172-82.  
41  
42  
43 35. Milgrom JD, B. G., Gemmill, Aa.a W., Holt, C., Christopher, J. Internet cognitive behavioral  
44  
45 therapy for women with postnatal depression: A randomized controlled trial of  
46  
47 MumMoodBooster. *Journal of Medical Internet Research* 2016;18(3)  
48  
49  
50 36. NOrsker F, Espenhain, L, Rogvi, S, Morgen, CS, Andersen, PK, Andersen, A. Socioeconomic  
51  
52 position and the risk of spontaneous abortion: a study within the Danish National Birth  
53  
54 Cohort. *BMJ Open* 2012;2::e001077.  
55  
56  
57  
58  
59  
60

- 1  
2  
3 37. Seaton S, Field, DJ, Draper, ES, Manktelow, BN, Smith, GCS, Springett, A, Smith, LK.  
4  
5 Socioeconomic inequalities in the rate of stillbirths by cause: a population-based study.  
6  
7 *BMJ Open* 2012;2:e001100.  
8  
9
- 10 38. Singh G, Daus, GP, Allender, M, Ramey, CT, Martin, EK, Perry, C, De Los Reyes, AA,  
11  
12 Vedamuthu, IP. Social Determinants of Health in the United States: Addressing Major  
13  
14 Health Inequality Trends for the Nation, 1935-2016. *International Journal of MCH and*  
15  
16 *AIDS* 2017;6(2):139-64.  
17  
18
- 19 39. Hobfoll SE, Ritter C, Lavin J, et al. Depression prevalence and incidence among inner-city  
20  
21 pregnant and postpartum women. *Journal of Consulting and Clinical Psychology*  
22  
23 1995;63(3):445-53.  
24  
25
- 26 40. Scholle SH, Haskett RF, Hanusa BH, et al. Addressing depression in obstetrics/gynecology  
27  
28 practice. *General Hospital Psychiatry* 2003;25(2):83-90.  
29  
30
- 31 41. Davilla M, McFall, S.L., & Cheng, D. Acculturation and depressive symptoms among pregnant  
32  
33 and postpartum Latinas. *Maternal and Child Health Journal*, 2008;13:318-25.  
34
- 35 42. Chaudron LH, Kitzman, H.J., Peifer, K.L., Morrow, S. Perez, L.M., & Newman, M.C.  
36  
37 Prevalence of maternal depressive symptoms in low-income Hispanic women. *Journal of*  
38  
39 *Clinical psychiatry* 2005;66(4):418-23.  
40  
41
- 42 43. Boury J, Larkin K, Krummel D. Factors related to postpartum depressive symptoms in low-  
43  
44 income women. *Women and Health* 2004;39(3):19-34.  
45  
46
- 47 44. Price S, Proctor E. A rural perspective on perinatal depression: Prevalence, correlates, and  
48  
49 implications for help-seeking among low-income women. *The Journal or Rural Health*  
50  
51 2009;25(2):158-66.  
52  
53  
54  
55  
56  
57  
58  
59  
60

- 1  
2  
3 45. Hobfoll SE, Ritter C, Lavin J, et al. Depression prevalence and incidence among inner-city  
4 pregnant and postpartum women. *Journal of Consulting and Clinical Psychology*  
5 1995;63(3):445-53.  
6  
7  
8  
9  
10 46. Morris-Rush JK, Freda, M.C., & Bernstein, P.S. Screening for postpartum depression in an  
11 inner-city population. *American Journal of Obstetrics and Gynecology* 2003;188(5):1217-  
12 19.  
13  
14  
15  
16  
17 47. Evans J, Heron J, H. F, et al. Cohort study of depressed mood during pregnancy and after  
18 childbirth. *British Medical Journal* 2001;323:257-60.  
19  
20  
21  
22 48. Mukherjee S, Edwards, DRV, Baird, DD, Savitz, DA, Hartmann, KE. Risk of Miscarriage  
23 Among Black Women and White Women in a US Prospective Cohort Study. *Am J*  
24 *epidemiol* 2013;177(11):1271-78.  
25  
26  
27  
28 49. Willinger M, Ko, C, Reddy, UM. Racial disparities in stillbirth risk across gestation in the  
29 United States. *Am J Obstet Gynecol* 2009;201(5):469.e1–69.e8.  
30  
31  
32  
33 50. US\_Department\_of\_Health\_and\_Human\_Services. Infant Mortality and African Americans  
34 2017 [Available from: <https://minorityhealth.hhs.gov/omh/browse.aspx?lvl=4&lvlid=23>  
35 accessed 12-10-2018 2018.  
36  
37  
38  
39  
40 51. Community\_Based\_Organization\_Partners. Community Based Organization Partners -  
41 Community Ethics Review Board (CBOP-CERB) 2021 [Available from:  
42 <https://www.hfrec.org/cerb/> accessed 9-17-21 2021.  
43  
44  
45  
46  
47 52. Johnson JE. Wirksamkeit von gruppenbehandlungen bei majorer depression (Efficacy of group  
48 treatments for major depressive disorder). *Gruppenpsychotherapie und Gruppendynamik*.  
49 2009;45:181-207.  
50  
51  
52  
53  
54  
55  
56  
57  
58  
59  
60

- 1  
2  
3 53. Cuijpers P. A psychoeducational approach to the treatment of depression: A meta-analysis of  
4  
5 Lewinsohn's "Coping with Depression" course. *Behavior Therapy* 1998;29:521-33.  
6  
7  
8 54. Gilbert K, & Smart, LS. Coping with infant or fetal loss: The couple's healing process. . New  
9  
10 York: Bruner/Mazel 1992.  
11  
12 55. Lewinsohn P, Antonuccio, DO, Breckenridge, JS, & Teri, L. The "Coping With Depression"  
13  
14 course. Eugene, OR: Castalia 1984.  
15  
16  
17 56. American\_Psychiatric\_Association. Diagnostic and statistical manual of mental disorders (5th  
18  
19 ed.). Washington DC: American Psychiatric Association 2013.  
20  
21  
22 57. Johnson JE, Jones, R., Miller, T., Miller, I., Stanley, B., Brown, G., Arias, SA, Cerbo, L.,  
23  
24 Rexroth, J., Fitting, J., Russell, D., Kubiak, S., Stein, M., Matkovic, C., YEn, S., Gaudiano,  
25  
26 B., Weinstock, LM. Study protocol: A randomized controlled trial of suicide risk reduction  
27  
28 in the year following jail release (the SPIRIT Trial). *Contemporary Clinical Trials*  
29  
30 2020;94:106003.  
31  
32  
33 58. Johnson, JE, Zlotnick, C. Pilot study of treatment for major depression among women prisoners  
34  
35 with substance use disorder. *Journal of Psychiatric Research* 2012;46(9):1174-83.  
36  
37  
38 59. Zlotnick CM, Ivan W., Pearlstein, T, Howard, M, Sweeney, PA. Preventive intervention for  
39  
40 pregnant women on public assistance at risk for postpartum depression. *Am J Psychiatry*  
41  
42 2006;163(8):1443-45.  
43  
44  
45 60. First M, Williams, JBW, Karg, RS, Spitzer, RL. Structured Clinical Interview for DSM-5.  
46  
47 Arlington, VA: American Psychiatric Association 2015.  
48  
49 61. Keller M, Lavori, PW, Friedman, B, Nielson, E, Endicott, J, McDonald-Scott, P, & Andreasen,  
50  
51 NC. The Longitudinal Interval Follow-up Evaluation: A comprehensive method for  
52  
53  
54  
55  
56  
57  
58  
59  
60

- 1  
2  
3 assessing outcome in prospective longitudinal studies. *Archives of General Psychiatry*  
4  
5 1987a;44:540-48.  
6  
7  
8 62. Warshaw M, Keller, MB, & Stout, R. Reliability and validity of the longitudinal interval  
9  
10 follow-up evaluation for assessing outcome of anxiety disorders. *Journal of Psychiatric*  
11  
12 *Research* 1994;28:531-45.  
13  
14  
15 63. Keller M. Past, present, and future directions for defining optimal treatment outcome in  
16  
17 depression: Remission and beyond. *JAMA* 2003;289(3152-3160)  
18  
19  
20 64. Smith P, Earp, JA, Devellis, R. Measuring battering: Development of the Women's Experience  
21  
22 with Battering (WEB) scale. *Women's Health: Research on gender, behavior, and policy*  
23  
24 1995;1(4):273-88.  
25  
26  
27 65. Rush A, Trivedi, MH, Ibrahim, HM, Carmody, TJ, Arnow, B, Klein, DN, Markowitz, JC,  
28  
29 Ninan, PT, Kornstein, S, Manber, R, Thase, ME, Kocsis, JH, Keller, MB. The 16-item  
30  
31 quick inventory of depressive symptomatology (QIDS), clinician rating (QIDS-C), and  
32  
33 self-report (QIDS-SR): A psychometric evaluation in patients with chronic major  
34  
35 depression. *Biological Psychiatry* 2003;54(5):573-83.  
36  
37  
38 66. Weathers F, Litz, BT, Keane, TM, Palmieri, PA, Marx, BP, Schnurr, PP. The PTSD  
39  
40 Checklist for DSM-5 (PCL-5). : National Center for PTSD; 2013 [Available from:  
41  
42 [www.ptsd.va.gov](http://www.ptsd.va.gov).  
43  
44  
45 67. Blevins C, Weathers, FW, Davis, MT, Witte, TK, & Domino, JL. The Posttraumatic Stress  
46  
47 Disorder Checklist for DSM-5 (PCL-5): Development and initial psychometric evaluation.  
48  
49 *Journal of Traumatic Stress*, 2015;28:489-98.  
50  
51  
52 68. Bovin M, Marx, BP, Weathers, FW, Gallagher, MW, Rodriguez, P, Schnurr, PP, and Keane,  
53  
54 TM. Psychometric properties of the PTSD Checklist for Diagnostic and Statistical Manual  
55  
56  
57  
58  
59

- of Mental Disorders-Fifth Edition (PCL-5) in Veterans. . *Psychological Assessment*, 2015;28:1379-91. .
69. Wortmann J, Jordan, AH, Weathers, FW, Resick, PA, Dondanville, KA, Hall-Clark, B., Foa, EB, Youhg-McCaughan, S., Yarvis, J, Hembree, EA, Mintz, J, Peterson, AL, Litz, BT. Psychometric analysis of the PTSD Checklist-5 (PCL-5) among treatment-seeking military service members. . *Psychological Assessment*, 2015;28:1392-403.
70. Dahlem N, Zimet, GW, Walker RR. The Multidimensional Scale of Perceived Support: A confirmation study. *Journal of Clinical Psychology* 1991;47(6):756-61.
71. Renshaw K, McKnight, P, Caska, CM, Blais, RK. The utility of the Relationship Assessment Scale in multiple types of relationships. *Journal of social and Personal Relationships* 2011;28(4):435-47.
72. Gameroff M, Wickramaratne, P., Weissman, M.M. Testing the Short and Screener versions of the Social Adjustment Scale –Self-report (SAS-SR). *Int J Methods Psychiatr Res* 2012;21(1):52-65.
73. Salsman J, Victorson, D, Choi, SW, Peterman, AH, Heinemann, AW, Nowinski, C, Cella, D. Development and validation of the positive affect and well-being scale for the neurology quality of life (Neuro-QOL) measurement system. *Qual Life Res* 2013;22(9):2569-80.
74. Ritsher J, & Neugebauer, R. Perinatal Bereavement Grief Scale: Distinguishing grief from depression following a miscarriage. *Assessment* 2002;9:31-40.
75. Prigerson H, Maciejewski, PK, & Reynolds, CF. Inventory of Complicated Grief: A scale to measure maladaptive symptoms of loss. *Psychiatry Research* 1995;59(1-2):65-79.
76. Callan M, Kay, AC, Dawtry, RJ. Making Sense of Misfortune: Deservingness, Self-Esteem, and Patterns of Self-Defeat. *J Pers Soc Psychol* 2014;107(1):142-62.

- 1  
2  
3 77. Lucas T, Alexander, S., Firestone, I. Belief in a just world, social influence and illness  
4 attributions: Evidence of a just world boomerang effect. *Journal of Health Psychology*  
5 2009;14(2):258-66.  
6  
7  
8  
9  
10 78. Glinder JG, and Compas, B. E. Self-blame attributions in women with newly diagnosed breast  
11 cancer: A prospective study of psychological adjustment. *Health Psychology*  
12 1999;18(5):475-81.  
13  
14  
15  
16 79. Attkisson, CC, Zwick, R. The Client Satisfaction Questionnaire: Psychometric properties and  
17 correlations with service utilization and psychotherapy outcome. *Evaluation and Program*  
18 *Planning* 1982;5:233-237.  
19  
20  
21  
22  
23 80. Citrome L. Compelling or irrelevant? Using number needed to treat can help decide. *Acta*  
24 *Psychiatrica Scandinavica* 2008;117(6):412-19.  
25  
26  
27  
28 81. Kraemer H. A source of false findings in published research studies: Adjusting for covariates.  
29 *JAMA Psychiatry* 2015;72:961-62.  
30  
31  
32  
33 82. Little R, Rubin M. Statistical Analysis with Missing Data. New York: Wiley and Sons 1987.  
34  
35 83. Hogan JW, Roy J, Korkontzelou C. Handling drop-out in longitudinal studies. *Statistics in*  
36 *Medicine* 2004;23(9):1455-97.  
37  
38  
39  
40 84. Shen C, Weissfeld L. Application of pattern-mixture models to outcomes that are potentially  
41 missing not at random using pseudo maximum likelihood estimation. *Biostatistics*  
42 2005;6(2):333-47.  
43  
44  
45  
46 85. Preacher KJ SJ. Advantages of Monte Carlo confidence intervals for indirect effects.  
47 *Communication Methods and Measures* 2012;6:77-98.  
48  
49  
50  
51 86. Biesanz JC FC, Savalei V. Assessing mediational models: Testing and interval estimation for  
52 indirect effects. *Multivariate Behavioral Research* 2010;45:661-701.  
53  
54  
55  
56  
57  
58  
59  
60



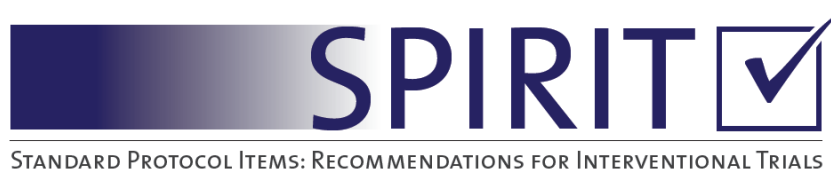

SPIRIT 2013 Checklist: Recommended items to address in a clinical trial protocol and related documents\*

| Section/item                      | Item No | Description                                                                                                                                                                                                                                                                              | Pages |
|-----------------------------------|---------|------------------------------------------------------------------------------------------------------------------------------------------------------------------------------------------------------------------------------------------------------------------------------------------|-------|
| <b>Administrative information</b> |         |                                                                                                                                                                                                                                                                                          |       |
| Title                             | 1       | Descriptive title identifying the study design, population, interventions, and, if applicable, trial acronym                                                                                                                                                                             | 1     |
| Trial registration                | 2a      | Trial identifier and registry name. If not yet registered, name of intended registry                                                                                                                                                                                                     | 3     |
|                                   | 2b      | All items from the World Health Organization Trial Registration Data Set                                                                                                                                                                                                                 |       |
| Protocol version                  | 3       | Date and version identifier                                                                                                                                                                                                                                                              | NA    |
| Funding                           | 4       | Sources and types of financial, material, and other support                                                                                                                                                                                                                              | 18    |
| Roles and responsibilities        | 5a      | Names, affiliations, and roles of protocol contributors                                                                                                                                                                                                                                  | 1, 18 |
|                                   | 5b      | Name and contact information for the trial sponsor                                                                                                                                                                                                                                       |       |
|                                   | 5c      | Role of study sponsor and funders, if any, in study design; collection, management, analysis, and interpretation of data; writing of the report; and the decision to submit the report for publication, including whether they will have ultimate authority over any of these activities |       |
|                                   | 5d      | Composition, roles, and responsibilities of the coordinating centre, steering committee, endpoint adjudication committee, data management team, and other individuals or groups overseeing the trial, if applicable (see Item 21a for data monitoring committee)                         |       |
| <b>Introduction</b>               |         |                                                                                                                                                                                                                                                                                          |       |
| Background and rationale          | 6a      | Description of research question and justification for undertaking the trial, including summary of relevant studies (published and unpublished) examining benefits and harms for each intervention                                                                                       | 4-6   |
|                                   | 6b      | Explanation for choice of comparators                                                                                                                                                                                                                                                    |       |
| Objectives                        | 7       | Specific objectives or hypotheses                                                                                                                                                                                                                                                        | 5     |

|    |                                                           |     |                                                                                                                                                                                                                                                                                                                                                                                |              |
|----|-----------------------------------------------------------|-----|--------------------------------------------------------------------------------------------------------------------------------------------------------------------------------------------------------------------------------------------------------------------------------------------------------------------------------------------------------------------------------|--------------|
| 1  |                                                           |     |                                                                                                                                                                                                                                                                                                                                                                                |              |
| 2  | Trial design                                              | 8   | Description of trial design including type of trial (eg, parallel group, crossover, factorial, single group), allocation ratio, and framework (eg, superiority, equivalence, noninferiority, exploratory)                                                                                                                                                                      | <b>9</b>     |
| 3  |                                                           |     |                                                                                                                                                                                                                                                                                                                                                                                |              |
| 4  |                                                           |     |                                                                                                                                                                                                                                                                                                                                                                                |              |
| 5  |                                                           |     |                                                                                                                                                                                                                                                                                                                                                                                |              |
| 6  |                                                           |     |                                                                                                                                                                                                                                                                                                                                                                                |              |
| 7  |                                                           |     |                                                                                                                                                                                                                                                                                                                                                                                |              |
| 8  | <b>Methods: Participants, interventions, and outcomes</b> |     |                                                                                                                                                                                                                                                                                                                                                                                |              |
| 9  |                                                           |     |                                                                                                                                                                                                                                                                                                                                                                                |              |
| 10 | Study setting                                             | 9   | Description of study settings (eg, community clinic, academic hospital) and list of countries where data will be collected. Reference to where list of study sites can be obtained                                                                                                                                                                                             | <b>10</b>    |
| 11 |                                                           |     |                                                                                                                                                                                                                                                                                                                                                                                |              |
| 12 |                                                           |     |                                                                                                                                                                                                                                                                                                                                                                                |              |
| 13 |                                                           |     |                                                                                                                                                                                                                                                                                                                                                                                |              |
| 14 |                                                           |     |                                                                                                                                                                                                                                                                                                                                                                                |              |
| 15 | Eligibility criteria                                      | 10  | Inclusion and exclusion criteria for participants. If applicable, eligibility criteria for study centres and individuals who will perform the interventions (eg, surgeons, psychotherapists)                                                                                                                                                                                   | <b>8-9</b>   |
| 16 |                                                           |     |                                                                                                                                                                                                                                                                                                                                                                                |              |
| 17 |                                                           |     |                                                                                                                                                                                                                                                                                                                                                                                |              |
| 18 |                                                           |     |                                                                                                                                                                                                                                                                                                                                                                                |              |
| 19 |                                                           |     |                                                                                                                                                                                                                                                                                                                                                                                |              |
| 20 | Interventions                                             | 11a | Interventions for each group with sufficient detail to allow replication, including how and when they will be administered                                                                                                                                                                                                                                                     | <b>6-8</b>   |
| 21 |                                                           |     |                                                                                                                                                                                                                                                                                                                                                                                |              |
| 22 |                                                           |     |                                                                                                                                                                                                                                                                                                                                                                                |              |
| 23 |                                                           |     |                                                                                                                                                                                                                                                                                                                                                                                |              |
| 24 |                                                           |     |                                                                                                                                                                                                                                                                                                                                                                                |              |
| 25 |                                                           | 11b | Criteria for discontinuing or modifying allocated interventions for a given trial participant (eg, drug dose change in response to harms, participant request, or improving/worsening disease)                                                                                                                                                                                 | <b>17</b>    |
| 26 |                                                           |     |                                                                                                                                                                                                                                                                                                                                                                                |              |
| 27 |                                                           |     |                                                                                                                                                                                                                                                                                                                                                                                |              |
| 28 |                                                           |     |                                                                                                                                                                                                                                                                                                                                                                                |              |
| 29 |                                                           |     |                                                                                                                                                                                                                                                                                                                                                                                |              |
| 30 |                                                           | 11c | Strategies to improve adherence to intervention protocols, and any procedures for monitoring adherence (eg, drug tablet return, laboratory tests)                                                                                                                                                                                                                              | <b>10</b>    |
| 31 |                                                           |     |                                                                                                                                                                                                                                                                                                                                                                                |              |
| 32 |                                                           |     |                                                                                                                                                                                                                                                                                                                                                                                |              |
| 33 |                                                           |     |                                                                                                                                                                                                                                                                                                                                                                                |              |
| 34 |                                                           |     |                                                                                                                                                                                                                                                                                                                                                                                |              |
| 35 |                                                           | 11d | Relevant concomitant care and interventions that are permitted or prohibited during the trial                                                                                                                                                                                                                                                                                  | <b>8</b>     |
| 36 |                                                           |     |                                                                                                                                                                                                                                                                                                                                                                                |              |
| 37 |                                                           |     |                                                                                                                                                                                                                                                                                                                                                                                |              |
| 38 | Outcomes                                                  | 12  | Primary, secondary, and other outcomes, including the specific measurement variable (eg, systolic blood pressure), analysis metric (eg, change from baseline, final value, time to event), method of aggregation (eg, median, proportion), and time point for each outcome. Explanation of the clinical relevance of chosen efficacy and harm outcomes is strongly recommended | <b>11-13</b> |
| 39 |                                                           |     |                                                                                                                                                                                                                                                                                                                                                                                |              |
| 40 |                                                           |     |                                                                                                                                                                                                                                                                                                                                                                                |              |
| 41 |                                                           |     |                                                                                                                                                                                                                                                                                                                                                                                |              |
| 42 |                                                           |     |                                                                                                                                                                                                                                                                                                                                                                                |              |
| 43 |                                                           |     |                                                                                                                                                                                                                                                                                                                                                                                |              |
| 44 |                                                           |     |                                                                                                                                                                                                                                                                                                                                                                                |              |
| 45 |                                                           |     |                                                                                                                                                                                                                                                                                                                                                                                |              |
| 46 |                                                           |     |                                                                                                                                                                                                                                                                                                                                                                                |              |
| 47 | Participant timeline                                      | 13  | Time schedule of enrolment, interventions (including any run-ins and washouts), assessments, and visits for participants. A schematic diagram is highly recommended (see Figure)                                                                                                                                                                                               | <b>20</b>    |
| 48 |                                                           |     |                                                                                                                                                                                                                                                                                                                                                                                |              |
| 49 |                                                           |     |                                                                                                                                                                                                                                                                                                                                                                                |              |
| 50 |                                                           |     |                                                                                                                                                                                                                                                                                                                                                                                |              |
| 51 |                                                           |     |                                                                                                                                                                                                                                                                                                                                                                                |              |
| 52 |                                                           |     |                                                                                                                                                                                                                                                                                                                                                                                |              |
| 53 | Sample size                                               | 14  | Estimated number of participants needed to achieve study objectives and how it was determined, including clinical and statistical assumptions supporting any sample size calculations                                                                                                                                                                                          | <b>15-16</b> |
| 54 |                                                           |     |                                                                                                                                                                                                                                                                                                                                                                                |              |
| 55 |                                                           |     |                                                                                                                                                                                                                                                                                                                                                                                |              |
| 56 |                                                           |     |                                                                                                                                                                                                                                                                                                                                                                                |              |
| 57 |                                                           |     |                                                                                                                                                                                                                                                                                                                                                                                |              |
| 58 |                                                           |     |                                                                                                                                                                                                                                                                                                                                                                                |              |
| 59 |                                                           |     |                                                                                                                                                                                                                                                                                                                                                                                |              |
| 60 |                                                           |     |                                                                                                                                                                                                                                                                                                                                                                                |              |

|    |                                                                     |     |                                                                                                                                                                                                                                                                                                                                                                                                              |              |
|----|---------------------------------------------------------------------|-----|--------------------------------------------------------------------------------------------------------------------------------------------------------------------------------------------------------------------------------------------------------------------------------------------------------------------------------------------------------------------------------------------------------------|--------------|
| 1  |                                                                     |     |                                                                                                                                                                                                                                                                                                                                                                                                              |              |
| 2  | Recruitment                                                         | 15  | Strategies for achieving adequate participant enrollment to reach target sample size                                                                                                                                                                                                                                                                                                                         | <b>9-10</b>  |
| 3  |                                                                     |     |                                                                                                                                                                                                                                                                                                                                                                                                              |              |
| 4  |                                                                     |     |                                                                                                                                                                                                                                                                                                                                                                                                              |              |
| 5  | <b>Methods: Assignment of interventions (for controlled trials)</b> |     |                                                                                                                                                                                                                                                                                                                                                                                                              |              |
| 6  |                                                                     |     |                                                                                                                                                                                                                                                                                                                                                                                                              |              |
| 7  | Allocation:                                                         |     |                                                                                                                                                                                                                                                                                                                                                                                                              | <b>9</b>     |
| 8  |                                                                     |     |                                                                                                                                                                                                                                                                                                                                                                                                              |              |
| 9  | Sequence generation                                                 | 16a | Method of generating the allocation sequence (eg, computer-generated random numbers), and list of any factors for stratification. To reduce predictability of a random sequence, details of any planned restriction (eg, blocking) should be provided in a separate document that is unavailable to those who enrol participants or assign interventions                                                     | <b>9</b>     |
| 10 |                                                                     |     |                                                                                                                                                                                                                                                                                                                                                                                                              |              |
| 11 |                                                                     |     |                                                                                                                                                                                                                                                                                                                                                                                                              |              |
| 12 |                                                                     |     |                                                                                                                                                                                                                                                                                                                                                                                                              |              |
| 13 |                                                                     |     |                                                                                                                                                                                                                                                                                                                                                                                                              |              |
| 14 |                                                                     |     |                                                                                                                                                                                                                                                                                                                                                                                                              |              |
| 15 |                                                                     |     |                                                                                                                                                                                                                                                                                                                                                                                                              |              |
| 16 |                                                                     |     |                                                                                                                                                                                                                                                                                                                                                                                                              |              |
| 17 |                                                                     |     |                                                                                                                                                                                                                                                                                                                                                                                                              |              |
| 18 | Allocation concealment mechanism                                    | 16b | Mechanism of implementing the allocation sequence (eg, central telephone; sequentially numbered, opaque, sealed envelopes), describing any steps to conceal the sequence until interventions are assigned                                                                                                                                                                                                    | <b>9</b>     |
| 19 |                                                                     |     |                                                                                                                                                                                                                                                                                                                                                                                                              |              |
| 20 |                                                                     |     |                                                                                                                                                                                                                                                                                                                                                                                                              |              |
| 21 |                                                                     |     |                                                                                                                                                                                                                                                                                                                                                                                                              |              |
| 22 |                                                                     |     |                                                                                                                                                                                                                                                                                                                                                                                                              |              |
| 23 |                                                                     |     |                                                                                                                                                                                                                                                                                                                                                                                                              |              |
| 24 | Implementation                                                      | 16c | Who will generate the allocation sequence, who will enrol participants, and who will assign participants to interventions                                                                                                                                                                                                                                                                                    | <b>9</b>     |
| 25 |                                                                     |     |                                                                                                                                                                                                                                                                                                                                                                                                              |              |
| 26 |                                                                     |     |                                                                                                                                                                                                                                                                                                                                                                                                              |              |
| 27 |                                                                     |     |                                                                                                                                                                                                                                                                                                                                                                                                              |              |
| 28 | Blinding (masking)                                                  | 17a | Who will be blinded after assignment to interventions (eg, trial participants, care providers, outcome assessors, data analysts), and how                                                                                                                                                                                                                                                                    | <b>10</b>    |
| 29 |                                                                     |     |                                                                                                                                                                                                                                                                                                                                                                                                              |              |
| 30 |                                                                     |     |                                                                                                                                                                                                                                                                                                                                                                                                              |              |
| 31 |                                                                     |     |                                                                                                                                                                                                                                                                                                                                                                                                              |              |
| 32 |                                                                     |     |                                                                                                                                                                                                                                                                                                                                                                                                              |              |
| 33 |                                                                     | 17b | If blinded, circumstances under which unblinding is permissible, and procedure for revealing a participant's allocated intervention during the trial                                                                                                                                                                                                                                                         | <b>NA</b>    |
| 34 |                                                                     |     |                                                                                                                                                                                                                                                                                                                                                                                                              |              |
| 35 |                                                                     |     |                                                                                                                                                                                                                                                                                                                                                                                                              |              |
| 36 |                                                                     |     |                                                                                                                                                                                                                                                                                                                                                                                                              |              |
| 37 | <b>Methods: Data collection, management, and analysis</b>           |     |                                                                                                                                                                                                                                                                                                                                                                                                              |              |
| 38 |                                                                     |     |                                                                                                                                                                                                                                                                                                                                                                                                              |              |
| 39 | Data collection methods                                             | 18a | Plans for assessment and collection of outcome, baseline, and other trial data, including any related processes to promote data quality (eg, duplicate measurements, training of assessors) and a description of study instruments (eg, questionnaires, laboratory tests) along with their reliability and validity, if known. Reference to where data collection forms can be found, if not in the protocol | <b>11-13</b> |
| 40 |                                                                     |     |                                                                                                                                                                                                                                                                                                                                                                                                              |              |
| 41 |                                                                     |     |                                                                                                                                                                                                                                                                                                                                                                                                              |              |
| 42 |                                                                     |     |                                                                                                                                                                                                                                                                                                                                                                                                              |              |
| 43 |                                                                     |     |                                                                                                                                                                                                                                                                                                                                                                                                              |              |
| 44 |                                                                     |     |                                                                                                                                                                                                                                                                                                                                                                                                              |              |
| 45 |                                                                     |     |                                                                                                                                                                                                                                                                                                                                                                                                              |              |
| 46 |                                                                     |     |                                                                                                                                                                                                                                                                                                                                                                                                              |              |
| 47 |                                                                     |     |                                                                                                                                                                                                                                                                                                                                                                                                              |              |
| 48 |                                                                     |     |                                                                                                                                                                                                                                                                                                                                                                                                              |              |
| 49 |                                                                     | 18b | Plans to promote participant retention and complete follow-up, including list of any outcome data to be collected for participants who discontinue or deviate from intervention protocols                                                                                                                                                                                                                    | <b>10</b>    |
| 50 |                                                                     |     |                                                                                                                                                                                                                                                                                                                                                                                                              |              |
| 51 |                                                                     |     |                                                                                                                                                                                                                                                                                                                                                                                                              |              |
| 52 |                                                                     |     |                                                                                                                                                                                                                                                                                                                                                                                                              |              |
| 53 |                                                                     |     |                                                                                                                                                                                                                                                                                                                                                                                                              |              |
| 54 | Data management                                                     | 19  | Plans for data entry, coding, security, and storage, including any related processes to promote data quality (eg, double data entry; range checks for data values). Reference to where details of data management procedures can be found, if not in the protocol                                                                                                                                            | <b>16</b>    |
| 55 |                                                                     |     |                                                                                                                                                                                                                                                                                                                                                                                                              |              |
| 56 |                                                                     |     |                                                                                                                                                                                                                                                                                                                                                                                                              |              |
| 57 |                                                                     |     |                                                                                                                                                                                                                                                                                                                                                                                                              |              |
| 58 |                                                                     |     |                                                                                                                                                                                                                                                                                                                                                                                                              |              |
| 59 |                                                                     |     |                                                                                                                                                                                                                                                                                                                                                                                                              |              |
| 60 |                                                                     |     |                                                                                                                                                                                                                                                                                                                                                                                                              |              |

|    |                                 |     |                                                                  |              |
|----|---------------------------------|-----|------------------------------------------------------------------|--------------|
| 1  |                                 |     |                                                                  |              |
| 2  | Statistical                     | 20a | Statistical methods for analysing primary and secondary          | <b>13-15</b> |
| 3  | methods                         |     | outcomes. Reference to where other details of the statistical    |              |
| 4  |                                 |     | analysis plan can be found, if not in the protocol               |              |
| 5  |                                 |     |                                                                  |              |
| 6  |                                 | 20b | Methods for any additional analyses (eg, subgroup and            | <b>13-15</b> |
| 7  |                                 |     | adjusted analyses)                                               |              |
| 8  |                                 |     |                                                                  |              |
| 9  |                                 | 20c | Definition of analysis population relating to protocol non-      | <b>13-15</b> |
| 10 |                                 |     | adherence (eg, as randomised analysis), and any statistical      |              |
| 11 |                                 |     | methods to handle missing data (eg, multiple imputation)         |              |
| 12 |                                 |     |                                                                  |              |
| 13 |                                 |     |                                                                  |              |
| 14 | <b>Methods: Monitoring</b>      |     |                                                                  |              |
| 15 |                                 |     |                                                                  |              |
| 16 | Data monitoring                 | 21a | Composition of data monitoring committee (DMC); summary          | <b>NA</b>    |
| 17 |                                 |     | of its role and reporting structure; statement of whether it is  |              |
| 18 |                                 |     | independent from the sponsor and competing interests; and        |              |
| 19 |                                 |     | reference to where further details about its charter can be      |              |
| 20 |                                 |     | found, if not in the protocol. Alternatively, an explanation of  |              |
| 21 |                                 |     | why a DMC is not needed                                          |              |
| 22 |                                 |     |                                                                  |              |
| 23 |                                 |     |                                                                  |              |
| 24 |                                 | 21b | Description of any interim analyses and stopping guidelines,     | <b>13</b>    |
| 25 |                                 |     | including who will have access to these interim results and      |              |
| 26 |                                 |     | make the final decision to terminate the trial                   |              |
| 27 |                                 |     |                                                                  |              |
| 28 | Harms                           | 22  | Plans for collecting, assessing, reporting, and managing         | <b>17</b>    |
| 29 |                                 |     | solicited and spontaneously reported adverse events and          |              |
| 30 |                                 |     | other unintended effects of trial interventions or trial conduct |              |
| 31 |                                 |     |                                                                  |              |
| 32 |                                 |     |                                                                  |              |
| 33 | Auditing                        | 23  | Frequency and procedures for auditing trial conduct, if any,     | <b>NA</b>    |
| 34 |                                 |     | and whether the process will be independent from                 |              |
| 35 |                                 |     | investigators and the sponsor                                    |              |
| 36 |                                 |     |                                                                  |              |
| 37 |                                 |     |                                                                  |              |
| 38 | <b>Ethics and dissemination</b> |     |                                                                  |              |
| 39 |                                 |     |                                                                  |              |
| 40 | Research ethics                 | 24  | Plans for seeking research ethics committee/institutional        | <b>16</b>    |
| 41 | approval                        |     | review board (REC/IRB) approval                                  |              |
| 42 |                                 |     |                                                                  |              |
| 43 | Protocol                        | 25  | Plans for communicating important protocol modifications         | <b>NA</b>    |
| 44 | amendments                      |     | (eg, changes to eligibility criteria, outcomes, analyses) to     |              |
| 45 |                                 |     | relevant parties (eg, investigators, REC/IRBs, trial             |              |
| 46 |                                 |     | participants, trial registries, journals, regulators)            |              |
| 47 |                                 |     |                                                                  |              |
| 48 | Consent or                      | 26a | Who will obtain informed consent or assent from potential        | <b>16</b>    |
| 49 | assent                          |     | trial participants or authorised surrogates, and how (see        |              |
| 50 |                                 |     | Item 32)                                                         |              |
| 51 |                                 |     |                                                                  |              |
| 52 |                                 |     |                                                                  |              |
| 53 |                                 | 26b | Additional consent provisions for collection and use of          | <b>NA</b>    |
| 54 |                                 |     | participant data and biological specimens in ancillary           |              |
| 55 |                                 |     | studies, if applicable                                           |              |
| 56 |                                 |     |                                                                  |              |
| 57 |                                 |     |                                                                  |              |
| 58 |                                 |     |                                                                  |              |
| 59 |                                 |     |                                                                  |              |
| 60 |                                 |     |                                                                  |              |

|    |                   |     |                                                                 |                |
|----|-------------------|-----|-----------------------------------------------------------------|----------------|
| 1  |                   |     |                                                                 |                |
| 2  | Confidentiality   | 27  | How personal information about potential and enrolled           | <b>16</b>      |
| 3  |                   |     | participants will be collected, shared, and maintained in       |                |
| 4  |                   |     | order to protect confidentiality before, during, and after the  |                |
| 5  |                   |     | trial                                                           |                |
| 6  |                   |     |                                                                 |                |
| 7  | Declaration of    | 28  | Financial and other competing interests for principal           | <b>18</b>      |
| 8  | interests         |     | investigators for the overall trial and each study site         |                |
| 9  |                   |     |                                                                 |                |
| 10 | Access to data    | 29  | Statement of who will have access to the final trial dataset,   | <b>17</b>      |
| 11 |                   |     | and disclosure of contractual agreements that limit such        |                |
| 12 |                   |     | access for investigators                                        |                |
| 13 |                   |     |                                                                 |                |
| 14 | Ancillary and     | 30  | Provisions, if any, for ancillary and post-trial care, and for  | <b>17</b>      |
| 15 | post-trial care   |     | compensation to those who suffer harm from trial                |                |
| 16 |                   |     | participation                                                   |                |
| 17 |                   |     |                                                                 |                |
| 18 |                   |     |                                                                 |                |
| 19 | Dissemination     | 31a | Plans for investigators and sponsor to communicate trial        | <b>17</b>      |
| 20 | policy            |     | results to participants, healthcare professionals, the public,  |                |
| 21 |                   |     | and other relevant groups (eg, via publication, reporting in    |                |
| 22 |                   |     | results databases, or other data sharing arrangements),         |                |
| 23 |                   |     | including any publication restrictions                          |                |
| 24 |                   |     |                                                                 |                |
| 25 |                   |     |                                                                 |                |
| 26 |                   | 31b | Authorship eligibility guidelines and any intended use of       | <b>NA</b>      |
| 27 |                   |     | professional writers                                            |                |
| 28 |                   |     |                                                                 |                |
| 29 |                   |     |                                                                 |                |
| 30 |                   | 31c | Plans, if any, for granting public access to the full protocol, | <b>17</b>      |
| 31 |                   |     | participant-level dataset, and statistical code                 |                |
| 32 |                   |     |                                                                 |                |
| 33 | <b>Appendices</b> |     |                                                                 |                |
| 34 |                   |     |                                                                 |                |
| 35 | Informed consent  | 32  | Model consent form and other related documentation given        | <b>attache</b> |
| 36 | materials         |     | to participants and authorised surrogates                       | <b>d</b>       |
| 37 |                   |     |                                                                 |                |
| 38 | Biological        | 33  | Plans for collection, laboratory evaluation, and storage of     | <b>NA</b>      |
| 39 | specimens         |     | biological specimens for genetic or molecular analysis in the   |                |
| 40 |                   |     | current trial and for future use in ancillary studies, if       |                |
| 41 |                   |     | applicable                                                      |                |
| 42 |                   |     |                                                                 |                |
| 43 |                   |     |                                                                 |                |

\*It is strongly recommended that this checklist be read in conjunction with the SPIRIT 2013 Explanation & Elaboration for important clarification on the items. Amendments to the protocol should be tracked and dated. The SPIRIT checklist is copyrighted by the SPIRIT Group under the Creative Commons "[Attribution-NonCommercial-NoDerivs 3.0 Unported](https://creativecommons.org/licenses/by-nc-nd/3.0/)" license.

# BMJ Open

## Protocol for the Healing After Loss (HeAL) Study: A randomized controlled trial of interpersonal psychotherapy (IPT) for major depression following perinatal loss

|                                 |                                                                                                                                                                                                                                                                                                                                                                                                                                                                                                                                                                                                                                                                                                                                      |
|---------------------------------|--------------------------------------------------------------------------------------------------------------------------------------------------------------------------------------------------------------------------------------------------------------------------------------------------------------------------------------------------------------------------------------------------------------------------------------------------------------------------------------------------------------------------------------------------------------------------------------------------------------------------------------------------------------------------------------------------------------------------------------|
| Journal:                        | <i>BMJ Open</i>                                                                                                                                                                                                                                                                                                                                                                                                                                                                                                                                                                                                                                                                                                                      |
| Manuscript ID                   | bmjopen-2021-057747.R2                                                                                                                                                                                                                                                                                                                                                                                                                                                                                                                                                                                                                                                                                                               |
| Article Type:                   | Protocol                                                                                                                                                                                                                                                                                                                                                                                                                                                                                                                                                                                                                                                                                                                             |
| Date Submitted by the Author:   | 02-Mar-2022                                                                                                                                                                                                                                                                                                                                                                                                                                                                                                                                                                                                                                                                                                                          |
| Complete List of Authors:       | Johnson, Jennifer; Michigan State University College of Human Medicine, OBGYN<br>Price, Ann B.; Warren Alpert Medical School of Brown University, Department of Psychiatry<br>Sikorskii, Alla; Michigan State University College of Osteopathic Medicine, Department of Psychiatry<br>Key, Kent; Michigan State University College of Human Medicine<br>Taylor, Brandon; Michigan State University College of Human Medicine<br>Lamphere, Susan; Michigan State University College of Human Medicine<br>Huff, Christine; Michigan State University College of Human Medicine<br>Cinader, Morgan; Michigan State University College of Human Medicine<br>Zlotnick, Caron; Butler Hospital; Women and Infants Hospital of Rhode Island |
| <b>Primary Subject Heading</b>: | Mental health                                                                                                                                                                                                                                                                                                                                                                                                                                                                                                                                                                                                                                                                                                                        |
| Secondary Subject Heading:      | Obstetrics and gynaecology, General practice / Family practice                                                                                                                                                                                                                                                                                                                                                                                                                                                                                                                                                                                                                                                                       |
| Keywords:                       | Depression & mood disorders < PSYCHIATRY, Adult psychiatry < PSYCHIATRY, Maternal medicine < OBSTETRICS                                                                                                                                                                                                                                                                                                                                                                                                                                                                                                                                                                                                                              |
|                                 |                                                                                                                                                                                                                                                                                                                                                                                                                                                                                                                                                                                                                                                                                                                                      |

SCHOLARONE™  
Manuscripts

1  
2  
3 Running Head: PERINATAL LOSS  
4  
5  
6

7 Protocol for the Healing After Loss (HeAL) Study: A randomized controlled trial of  
8 interpersonal psychotherapy (IPT) for major depression following perinatal loss  
9

10 Jennifer E. Johnson, Michigan State University College of Human Medicine, 200 East 1<sup>st</sup> St, Flint,  
11 MI 48503, USA. JJohns@msu.edu  
12  
13

14 Ann B. Price, Department of Psychiatry and Human Behavior, Alpert Medical School of Brown  
15 University, 700 Butler Ave, Providence, RI 02906, USA. Ann\_Back\_Price@brown.edu  
16  
17

18 Alla Sikorskii, Michigan State University College of Osteopathic Medicine, Department of  
19 Psychiatry, 909 Wilson Rd, East Lansing, MI 48824, USA. Sikorska@msu.edu  
20  
21

22 Kent D. Key, Michigan State University College of Human Medicine, 200 East 1<sup>st</sup> St, Flint, MI  
23 48503, USA. KeyKent@msu.edu  
24  
25

26 Brandon Taylor, Michigan State University College of Human Medicine, 200 East 1<sup>st</sup> St, Flint, MI  
27 48503, USA. Tay11214@msu.edu  
28  
29

30 Susan Lamphere, Michigan State University College of Human Medicine, 200 East 1<sup>st</sup> St, Flint,  
31 MI 48503, USA. Lamphe14@msu.edu  
32  
33

34 Christine Huff, Michigan State University College of Human Medicine, 200 East 1<sup>st</sup> St, Flint, MI  
35 48503, USA. HuffChr5@msu.edu  
36  
37

38 Morgan Cinader, Michigan State University College of Human Medicine, 200 East 1<sup>st</sup> St, Flint,  
39 MI 48503, USA. CinaderM@msu.edu  
40  
41

42 Caron Zlotnick, Butler Hospital and Women and Infants Hospital, 345 Blackstone Blvd,  
43 Providence, RI 02906, USA. University of Cape Town, Cape Town, South Africa.  
44 Caron\_Zlotnick@brown.edu  
45  
46

47 Corresponding Author: Jennifer E. Johnson, Michigan State University College of Human  
48 Medicine, 200 East 1<sup>st</sup> St, Flint, MI 48503, USA. JJohns@msu.edu  
49  
50  
51  
52

## Abstract

**Introduction.** This protocol describes a study testing the efficacy of interpersonal psychotherapy (IPT) for major depressive disorder following perinatal loss (early and late fetal death and early neonatal death). Perinatal loss is associated with elevated risk of major depressive disorder and posttraumatic stress disorder (PTSD). Perinatal loss conveys specific treatment needs. The trial will be the first fully-powered randomized trial of treatment for any psychiatric disorder following perinatal loss.

**Methods and analysis.** A sample of 274 women in Flint and Detroit areas in Michigan who experience a major depressive episode following a perinatal loss will be randomized to group IPT for perinatal loss or to group Coping with Depression (CWD). We anticipate that 50% of the sample will have co-occurring PTSD. Assessments occur at baseline, mid-treatment (8 weeks), post-treatment (16 weeks), and follow-up (28 weeks). Clinical outcomes include time to recovery from major depressive episode (primary), depressive symptoms, PTSD symptoms, and time to recovery from PTSD. Additional outcomes include social support, social role functioning (including parental functioning for those with living children), well-being, grief (including complicated grief and fault beliefs), and fear of subsequent pregnancies. Social support and grief are hypothesized mediators of IPT effects on time to recovery from major depressive episode.

**Ethics and dissemination.** The trial was approved by Michigan State University's Biomedical Institutional Review Board. It has a Data and Safety Monitoring Board and has been submitted to the Community Based Organization Partners Community Ethics Review Board. Written operating procedures outline methods for protecting confidentiality, monitoring and recording adverse events, and safeguarding participants. We will share study results with research and clinical communities, community organizations through which we recruited, and will offer results to study



1  
2  
3 participants. De-identified datasets will be available through the National Institute of Mental  
4  
5 Health Data Archive and to qualified investigators upon request.  
6  
7  
8  
9

10 **Clinical trials registration.** The trial was registered at [clinicaltrials.gov](https://clinicaltrials.gov) (NCT04629599).  
11

12 **Key words:** Miscarriage, stillbirth, fetal death, perinatal death, major depressive disorder,  
13  
14 posttraumatic stress disorder, interpersonal psychotherapy.  
15  
16

17 **Word count:** 4,000  
18  
19  
20  
21

### 22 **Article Summary: Strengths and limitations of this study**

- 23  
24 • This study addresses a clinical need, and will provide an evidence base for treating a n  
25  
26 understudied population whose distress has historically been minimized.  
27  
28
- 29 • The trial will have strong representation from disparities populations (especially African  
30  
31 American women and socioeconomically disadvantaged women) who experience higher  
32  
33 rates of perinatal loss, increasing its significance.  
34  
35
- 36 • Rigor and reproducibility are ensured by the randomized design, clear inclusion criteria,  
37  
38 use of well-established research, recruitment, and retention methods, use of reliable and  
39  
40 valid measures, the use of raters blinded to treatment condition, and transparent power and  
41  
42 statistical analyses.  
43  
44
- 45 • Intervention strengths include clearly distinct treatment conditions, use of manualized  
46  
47 treatment protocols and fidelity assessments, and team members with decades of clinical  
48  
49 experience responding to perinatal loss.  
50  
51
- 52 • Challenges may include recruitment during a global pandemic in communities with a  
53  
54 higher levels of research mistrust and more mental health stigma than in the pilot trial.  
55  
56  
57  
58  
59  
60

## Introduction

1  
2  
3  
4  
5  
6  
7  
8  
9  
10  
11  
12  
13  
14  
15  
16  
17  
18  
19  
20  
21  
22  
23  
24  
25  
26  
27  
28  
29  
30  
31  
32  
33  
34  
35  
36  
37  
38  
39  
40  
41  
42  
43  
44  
45  
46  
47  
48  
49  
50  
51  
52  
53  
54  
55  
56  
57  
58  
59  
60

About 650,000 women in the United States experience perinatal loss each year (including early and late fetal death and the death of a liveborn neonate within the first 28 days).<sup>1 2</sup> Rates of major depressive disorder (MDD) after perinatal loss are higher than after giving birth to a living infant, and are 3 times the rates among matched samples of community women.<sup>3-20</sup> Rates of posttraumatic stress disorder (PTSD) after perinatal loss are up to 7 times the rates of PTSD among mothers of living infants,<sup>13</sup> and elevated PTSD symptoms can occur for years after the loss.<sup>21</sup> Fetal or neonatal death triples rates of suicide and of hospitalization for suicide attempts.<sup>22 23</sup>

Not only do women with perinatal loss have higher rates of MDD and PTSD than mothers of living infants, their needs also differ from needs following many other kinds of bereavement. In perinatal loss, the fact of bereavement is compounded by the physical experience of miscarriage or of delivering a baby that has already died.<sup>24</sup> Many women experiencing perinatal loss grieve in secret, as others may not know about the loss. Even if others do know, there are few social norms that guide how others can or should support the bereaved, making support less likely and often less helpful (e.g., “you can just have another one”).<sup>12 25</sup> Reasons for loss are often unclear and many women blame themselves.

Despite recognition that MDD (with or without co-occurring PTSD) following perinatal loss causes impairment and that treatment as usual is often inadequate,<sup>26-30</sup> our previous pilot work<sup>31</sup> created and tested the first manual for treating any psychiatric disorder after perinatal loss. The manual is structured and applies interpersonal psychotherapy (IPT) principles to MDD following perinatal loss in a group format. Previous IPT and other treatment manuals for perinatal depression<sup>32-35</sup> focus on helping women adjust their relationships, identity, roles, and routines to the demands of a new baby. This is inappropriate in the context of perinatal loss. Our manual

1  
2  
3 applies IPT social support and communication principles to issues such as resolving conflicts over  
4  
5 how to respond to the loss, grieving and requesting support in the absence of social norms about  
6  
7 how to do so, and resolving questions of fault and role competence. It can be used by providers  
8  
9 who do not know IPT. A randomized pilot trial of women experiencing MDD following perinatal  
10  
11 loss established acceptability of proposed study procedures and identified high rates of co-  
12  
13 occurring PTSD (54%) among study participants.<sup>31</sup> Results favored the new IPT manual for PTSD  
14  
15 recovery, treatment satisfaction, depressive symptoms, grief, and social support relative to Coping  
16  
17 with Depression (CWD), a cognitive-behavioral based intervention that does not focus on perinatal  
18  
19 loss, interpersonal issues, or social support.<sup>31</sup>

20  
21  
22  
23  
24 Based on those promising results, the current study will be the first fully-powered  
25  
26 randomized trial of treatment for any psychiatric disorder following perinatal loss. We will  
27  
28 compare our group IPT manual to a general group depression treatment (CWD) in a sample of 274  
29  
30 women experiencing MDD in the context of perinatal loss. The trial will test the hypotheses that:

- 31  
32  
33 1. IPT for perinatal loss will result in reduced time to recovery from MDD (primary),  
34  
35 depressive symptoms, and PTSD symptoms, relative to CWD. Among women meeting  
36  
37 criteria for PTSD, IPT will result in reduced time to recovery from PTSD relative to CWD.
- 38  
39  
40 2. IPT for perinatal loss will result in increased social support, social role functioning  
41  
42 (including parental functioning for women with living children), and well-being, and  
43  
44 decreased grief and fear of subsequent pregnancies, relative to CWD.
- 45  
46  
47 3. Social support and grief will mediate the effects of IPT on time to MDD recovery.

48  
49 This trial will provide an evidence base for treating a vulnerable and understudied population  
50  
51 whose distress has historically been minimized. Given that poverty increases risk of perinatal  
52  
53 loss,<sup>36-38</sup> and doubles the risk of perinatal depression,<sup>39-47</sup> and that rates of perinatal loss for  
54  
55  
56  
57  
58  
59

1  
2  
3 African-American women are double those for white women,<sup>48-50</sup> the location of the trial in  
4 Southeast Michigan, which includes Flint and Detroit (minority-majority cities with high rates of  
5 poverty), increases the trial's significance.  
6  
7  
8

## 9 10 **Methods and analysis**

### 11 12 **Patient and public involvement**

13  
14 Research questions arose from a clinical need identified by provider colleagues. Patients  
15 provided feedback on treatments, measures, and study procedures in the pilot trial.<sup>31</sup> Local  
16 minority-led community-based organizations provided feedback on measures, procedures, and  
17 recruitment methods appropriate for the Flint and Detroit areas. The study team is embedded in  
18 Flint and Detroit. Team members have lived experience. The trial has been submitted for voluntary  
19 review by the Flint-based Community Based Organization Partners Community Ethics Review  
20 Board for additional community feedback.<sup>51</sup>  
21  
22  
23  
24  
25  
26  
27  
28  
29

### 30 31 **Rationale for design**

32  
33 Given that no other treatment exists for women who experience perinatal-loss related MDD  
34 that could be used as a comparator condition, we chose to use a general depression treatment, the  
35 Coping With Depression (CWD) course, as a control condition. We chose CWD because it is the  
36 group treatment with the most empirical support for treating MDD<sup>52 53</sup> and because it is distinct  
37 from IPT. IPT addresses MDD through emotional exploration, work on relationships,  
38 communication, grief, and social support. CWD addresses MDD by changing thinking and  
39 behavior; it focuses on skills for reducing depression in general and does not have perinatal-loss  
40 specific components. Our IPT treatment differs from CWD in its focus on exploring reactions to  
41 the loss, addressing loss-related interpersonal challenges, and improving loss-related social  
42 support and grief-specific coping. The trial's secondary outcomes (social support, social  
43  
44  
45  
46  
47  
48  
49  
50  
51  
52  
53  
54  
55  
56  
57  
58  
59  
60

1  
2  
3 functioning, grief) assess hypothesized differences between treatments. As desired, our pilot study  
4 found differences between conditions in the hypothesized mechanisms of social support and grief  
5 and in terms of in-session activities.<sup>31</sup>  
6  
7  
8

## 9 10 **Treatments**

11  
12 Manualized treatments are attention-matched (12 groups of 90 minutes each, 1 individual  
13 pre-group session, and 1 booster session). Every 4 weeks, both treatments allow new women to  
14 enter the group and women completing 12 weeks to leave the group.  
15  
16  
17

18  
19 **Interpersonal psychotherapy (IPT).** Participants in the IPT condition receive 12 group  
20 sessions and 2 individual (pre-group and 1-month booster) sessions as outlined in the structured  
21 manual (see Table 1 and pilot trial<sup>31</sup>). The individual sessions prepare patients to use the group  
22 effectively, to keep group members focused on their treatment goals, and to maintain treatment  
23 gains. In addition, 3 of the 12 group sessions invite women to include their partners or other  
24 support people to bolster the woman's social support system and to reduce conflicts over how to  
25 react to the loss. Relationship distress is common following perinatal loss.<sup>12 54</sup>  
26  
27  
28  
29  
30  
31  
32  
33  
34

35  
36 Group sessions are semi-structured, and each woman covers the four group topics listed in  
37 Table 1 three times over her 12 group sessions, approaching each topic from a different stage in  
38 the mourning process. New women are allowed to enter group every four sessions. This allows  
39 remaining women to see their own progress and encourages new women through example and  
40 peer counseling.  
41  
42  
43  
44  
45

46  
47 **Coping with Depression (CWD).** CWD is a structured, manualized<sup>55</sup> psycho-educational  
48 group treatment for MDD. The CWD course is cognitive-behavioral. The problems shown by  
49 depressed individuals are viewed as behavioral, with cognitive patterns that can be unlearned or  
50 relearned. Its effectiveness is comparable to other forms of psychotherapy in depression.<sup>53</sup> The  
51  
52  
53  
54  
55  
56  
57  
58  
59  
60

1  
2  
3 course content teaches skills including relaxation, cognitive skills, and behavioral activation. The  
4  
5 CWD pre-group and booster sessions are the pre-group and booster sessions from the published  
6  
7 CWD manual<sup>55</sup>. To ensure that the CWD intervention was distinct from IPT, we excluded the 2  
8  
9 sessions on social skills and emphasized pleasant activities that were individual rather than social.  
10  
11 Consistent with standard CWD, we focused on addressing depression rather than discussing grief  
12  
13 or perinatal loss. We expanded other CWD material (e.g., relaxation practice) to replace sessions  
14  
15 on social skills. In our studies, the 12 CWD sessions covered: an introduction to social learning  
16  
17 rationale of depression; learning to relax; relaxation in everyday situations; pleasant activities and  
18  
19 depression; formulating a pleasant activities plan; constructive thinking; planning for constructive  
20  
21 thinking; and maintaining gains (see published manual<sup>55</sup> and pilot trial<sup>31</sup> for additional details).  
22  
23  
24  
25

## 26 **Participants**

27  
28 Participants will be 274 women who are experiencing MDD in the context of perinatal loss  
29  
30 who (1) meet DSM-5<sup>56</sup> criteria for MDD; (2) have experienced a perinatal loss (including early  
31  
32 and late fetal death, death of a liveborn neonate within the first 28 days, and medically  
33  
34 recommended termination) within the last 1-12 months; (3) are 18 to 50 years old; (4) speak and  
35  
36 understand English well enough to understand questionnaires when they are read aloud; (5) can  
37  
38 provide the name and contact information of at least two locator persons; and (6) have access to a  
39  
40 telephone. Exclusion criteria are: (1) onset of *current* major depressive episode prior to news of  
41  
42 difficulties with the pregnancy or health risk to the infant (women with prior episodes are included);  
43  
44 (2) current or past diagnosis of bipolar disorder, schizophrenia or other psychotic disorder; (3)  
45  
46 primary diagnosis of current substance use disorder; (4) acute suicidal or homicidal risk; (5)  
47  
48 beginning or changing dose of antidepressant medication or psychotherapy in the previous 12  
49  
50 weeks); (6) any IPT or cognitive-behavioral treatment in the previous 12 weeks. Women in stable  
51  
52  
53  
54  
55  
56  
57  
58  
59  
60

1  
2  
3 concurrent psychotherapy who are included are asked to suspend this treatment during the active  
4 study treatment phase. PTSD is not an inclusion criterion. However, based on our pilot,<sup>31</sup> we  
5 anticipate that slightly more than half the sample will meet criteria for PTSD at study enrollment.  
6  
7

### 8 9 10 **Therapist training and supervision**

11  
12 We trained 8 study therapists (4 in IPT and 4 in CWD) who are MSWs or clinical or  
13 counseling psychologists. Therapists are recruited from their respective communities to moonlight  
14 as clinicians in this proposed study. Therapists are provided with the detailed treatment manuals.  
15  
16 Training for both conditions includes education and role plays. Therapists in both conditions will  
17 be monitored for adherence/competence throughout the study and retrained as needed.  
18  
19

20  
21 Supervision involves review of therapists' audiotaped sessions and a weekly one-hour  
22 small-group telephone meeting for feedback and case discussion. Treatment sessions are audio  
23 recorded using digital audio recorders or a HIPAA-compliant version of Zoom. Study therapists  
24 remotely upload the recordings to the study's secure research server, where the supervisors can  
25 remotely access them.  
26  
27

### 28 29 30 **Randomization**

31  
32 Women are randomly assigned to IPT or CWD in a 1:1 ratio. We stratify randomization  
33 on (1) whether women have been taking antidepressant medications or attending other  
34 psychotherapy (stability of dose is an inclusion criterion); and (2) type of perinatal loss  
35 (miscarriage, stillbirth, neonatal death). Randomization sequences were created by the study  
36  
37  
38  
39  
40  
41  
42  
43  
44  
45  
46  
47  
48  
49  
50  
51  
52  
53  
54  
55  
56  
57  
58  
59  
60  
61  
62  
63  
64  
65  
66  
67  
68  
69  
70  
71  
72  
73  
74  
75  
76  
77  
78  
79  
80  
81  
82  
83  
84  
85  
86  
87  
88  
89  
90  
91  
92  
93  
94  
95  
96  
97  
98  
99  
100  
101  
102  
103  
104  
105  
106  
107  
108  
109  
110  
111  
112  
113  
114  
115  
116  
117  
118  
119  
120  
121  
122  
123  
124  
125  
126  
127  
128  
129  
130  
131  
132  
133  
134  
135  
136  
137  
138  
139  
140  
141  
142  
143  
144  
145  
146  
147  
148  
149  
150  
151  
152  
153  
154  
155  
156  
157  
158  
159  
160  
161  
162  
163  
164  
165  
166  
167  
168  
169  
170  
171  
172  
173  
174  
175  
176  
177  
178  
179  
180  
181  
182  
183  
184  
185  
186  
187  
188  
189  
190  
191  
192  
193  
194  
195  
196  
197  
198  
199  
200  
201  
202  
203  
204  
205  
206  
207  
208  
209  
210  
211  
212  
213  
214  
215  
216  
217  
218  
219  
220  
221  
222  
223  
224  
225  
226  
227  
228  
229  
230  
231  
232  
233  
234  
235  
236  
237  
238  
239  
240  
241  
242  
243  
244  
245  
246  
247  
248  
249  
250  
251  
252  
253  
254  
255  
256  
257  
258  
259  
260  
261  
262  
263  
264  
265  
266  
267  
268  
269  
270  
271  
272  
273  
274  
275  
276  
277  
278  
279  
280  
281  
282  
283  
284  
285  
286  
287  
288  
289  
290  
291  
292  
293  
294  
295  
296  
297  
298  
299  
300  
301  
302  
303  
304  
305  
306  
307  
308  
309  
310  
311  
312  
313  
314  
315  
316  
317  
318  
319  
320  
321  
322  
323  
324  
325  
326  
327  
328  
329  
330  
331  
332  
333  
334  
335  
336  
337  
338  
339  
340  
341  
342  
343  
344  
345  
346  
347  
348  
349  
350  
351  
352  
353  
354  
355  
356  
357  
358  
359  
360  
361  
362  
363  
364  
365  
366  
367  
368  
369  
370  
371  
372  
373  
374  
375  
376  
377  
378  
379  
380  
381  
382  
383  
384  
385  
386  
387  
388  
389  
390  
391  
392  
393  
394  
395  
396  
397  
398  
399  
400  
401  
402  
403  
404  
405  
406  
407  
408  
409  
410  
411  
412  
413  
414  
415  
416  
417  
418  
419  
420  
421  
422  
423  
424  
425  
426  
427  
428  
429  
430  
431  
432  
433  
434  
435  
436  
437  
438  
439  
440  
441  
442  
443  
444  
445  
446  
447  
448  
449  
450  
451  
452  
453  
454  
455  
456  
457  
458  
459  
460  
461  
462  
463  
464  
465  
466  
467  
468  
469  
470  
471  
472  
473  
474  
475  
476  
477  
478  
479  
480  
481  
482  
483  
484  
485  
486  
487  
488  
489  
490  
491  
492  
493  
494  
495  
496  
497  
498  
499  
500  
501  
502  
503  
504  
505  
506  
507  
508  
509  
510  
511  
512  
513  
514  
515  
516  
517  
518  
519  
520  
521  
522  
523  
524  
525  
526  
527  
528  
529  
530  
531  
532  
533  
534  
535  
536  
537  
538  
539  
540  
541  
542  
543  
544  
545  
546  
547  
548  
549  
550  
551  
552  
553  
554  
555  
556  
557  
558  
559  
560  
561  
562  
563  
564  
565  
566  
567  
568  
569  
570  
571  
572  
573  
574  
575  
576  
577  
578  
579  
580  
581  
582  
583  
584  
585  
586  
587  
588  
589  
590  
591  
592  
593  
594  
595  
596  
597  
598  
599  
600  
601  
602  
603  
604  
605  
606  
607  
608  
609  
610  
611  
612  
613  
614  
615  
616  
617  
618  
619  
620  
621  
622  
623  
624  
625  
626  
627  
628  
629  
630  
631  
632  
633  
634  
635  
636  
637  
638  
639  
640  
641  
642  
643  
644  
645  
646  
647  
648  
649  
650  
651  
652  
653  
654  
655  
656  
657  
658  
659  
660  
661  
662  
663  
664  
665  
666  
667  
668  
669  
670  
671  
672  
673  
674  
675  
676  
677  
678  
679  
680  
681  
682  
683  
684  
685  
686  
687  
688  
689  
690  
691  
692  
693  
694  
695  
696  
697  
698  
699  
700  
701  
702  
703  
704  
705  
706  
707  
708  
709  
710  
711  
712  
713  
714  
715  
716  
717  
718  
719  
720  
721  
722  
723  
724  
725  
726  
727  
728  
729  
730  
731  
732  
733  
734  
735  
736  
737  
738  
739  
740  
741  
742  
743  
744  
745  
746  
747  
748  
749  
750  
751  
752  
753  
754  
755  
756  
757  
758  
759  
760  
761  
762  
763  
764  
765  
766  
767  
768  
769  
770  
771  
772  
773  
774  
775  
776  
777  
778  
779  
780  
781  
782  
783  
784  
785  
786  
787  
788  
789  
790  
791  
792  
793  
794  
795  
796  
797  
798  
799  
800  
801  
802  
803  
804  
805  
806  
807  
808  
809  
810  
811  
812  
813  
814  
815  
816  
817  
818  
819  
820  
821  
822  
823  
824  
825  
826  
827  
828  
829  
830  
831  
832  
833  
834  
835  
836  
837  
838  
839  
840  
841  
842  
843  
844  
845  
846  
847  
848  
849  
850  
851  
852  
853  
854  
855  
856  
857  
858  
859  
860  
861  
862  
863  
864  
865  
866  
867  
868  
869  
870  
871  
872  
873  
874  
875  
876  
877  
878  
879  
880  
881  
882  
883  
884  
885  
886  
887  
888  
889  
890  
891  
892  
893  
894  
895  
896  
897  
898  
899  
900  
901  
902  
903  
904  
905  
906  
907  
908  
909  
910  
911  
912  
913  
914  
915  
916  
917  
918  
919  
920  
921  
922  
923  
924  
925  
926  
927  
928  
929  
930  
931  
932  
933  
934  
935  
936  
937  
938  
939  
940  
941  
942  
943  
944  
945  
946  
947  
948  
949  
950  
951  
952  
953  
954  
955  
956  
957  
958  
959  
960  
961  
962  
963  
964  
965  
966  
967  
968  
969  
970  
971  
972  
973  
974  
975  
976  
977  
978  
979  
980  
981  
982  
983  
984  
985  
986  
987  
988  
989  
990  
991  
992  
993  
994  
995  
996  
997  
998  
999  
1000

1  
2  
3 Detroit, and a regional Medicaid system in study recruitment. Recruitment also includes flyers  
4 and referrals from: (1) local birthing centers, emergency departments, OBGYN offices, and  
5  
6 federally qualified health centers; (2) hotlines, support groups, family nurse partnerships; (3)  
7  
8 funeral homes; (4) churches, daycare centers, other places where women and mothers congregate  
9  
10 (WIC offices, Medicaid offices, etc.); (5) bus ads; and (6) online venues. We began recruitment  
11  
12 on September 1, 2021 and plan to end on March 1, 2025.  
13  
14  
15

### 16 17 **Research sites**

18  
19 We had planned to offer baseline assessments at women's homes or our offices, group  
20  
21 sessions in community locations convenient for participants (as we did in the pilot trial),<sup>31</sup> and to  
22  
23 conduct follow-up assessments by telephone. However, due to the COVID-19 pandemic, we are  
24  
25 currently conducting all assessments and treatment sessions by Zoom, with an option to go back  
26  
27 to holding groups in person in the future.  
28  
29

### 30 31 **Retention**

32  
33 We employ techniques we have found helpful in achieving low attrition rates in previous  
34  
35 studies.<sup>31 57-59</sup> These include study staff's strong relationships with participants, efforts to value  
36  
37 and appreciate the women's participation in the study, and frequent personal contact. We are  
38  
39 flexible about follow-up appointment scheduling and train research staff to be culturally sensitive.  
40  
41 Follow-up assessments take place by Zoom or phone, with well-established safety procedures for  
42  
43 emergencies.<sup>57</sup> We maintain a list of two other people who know where the participant resides.  
44  
45 We conduct treatment groups at different times and locations to make attendance easier. If a  
46  
47 woman misses a treatment appointment, the therapist calls her to check in and problem-solve  
48  
49 barriers to attendance. Finally, participant fees for follow-up assessments help facilitate retention.  
50  
51  
52

### 53 54 **Assessments**



1  
2  
3 Assessments take place at baseline, mid-treatment (8 weeks), post-treatment (16 weeks),  
4 and follow-up (28 weeks; see Table 2). Assessments are conducted by research assistants (RAs)  
5 trained and certified in interviewer administered instruments and blind to treatment assignment.  
6 Interviewers and senior staff meet regularly to review assessment tapes, address questions, and  
7 monitor inter-rater reliability. Data quality is maintained through clerical and clinical checks after  
8 data are entered and through regular examination of distributions, missing data, and outliers.  
9

10  
11  
12 **Diagnosis/screening.** The Structured Clinical Interview for DSM-5 (SCID-5)<sup>60</sup> is used to  
13 establish study eligibility. During follow-up, the Longitudinal Interval Follow-up Examination  
14 (LIFE),<sup>61 62</sup> a standardized retrospective calendar-based interview, is used to assess MDD and  
15 PTSD recovery. The LIFE uses Psychiatric Status Ratings (PSRs) to categorize DSM-5 symptoms  
16 on a scale of 1 (asymptomatic) to 6 (incapacitated) for each week. A PSR of 5 or 6 indicates the  
17 participant meets full diagnostic criteria, 3 or 4 indicates subthreshold disorder, and 1 or 2 indicates  
18 the participant is not in episode. Recovery is defined as 8 consecutive weeks of a PSR of 1-2.<sup>63</sup>  
19 The LIFE is the gold-standard way of determining onset and offset of psychiatric disorder.<sup>63</sup> We  
20 also use the LIFE to track participation in psychotherapeutic and psychopharmacologic treatment  
21 at baseline and follow-up. We assess partner violence using the Women's Experience with  
22 Battering screen.<sup>64</sup> Battered women (scores of 20+) are included in the study and provided with  
23 partner violence resources.  
24  
25

26  
27 **Depressive symptoms** are assessed using the Quick Inventory of Depressive Symptoms  
28 (QIDS), Self-Report version.<sup>65</sup>  
29

30  
31 **PTSD symptoms** are assessed using the Life Events Checklist and PTSD Checklist for  
32 DSM-5 (LEC-PCL).<sup>66-69</sup> We also assess whether PTSD symptoms are related to the perinatal loss.  
33

34  
35 **Social support and social functioning.** We use the 12-item Multidimensional Scale for  
36  
37  
38  
39  
40  
41  
42  
43  
44  
45  
46  
47  
48  
49  
50  
51  
52  
53  
54  
55  
56  
57  
58  
59  
60

1  
2  
3 Perceived Social Support (MSPSS)<sup>70</sup> to assess overall social support. We use a validated  
4  
5 adaptation of the Relationship Assessment Scale<sup>71</sup> to assess satisfaction with an important  
6  
7 significant other (partner or other support person of the woman's choosing) relationship. We assess  
8  
9 social functioning using the Short version of the Social Adjustment Scale – Self-Report (SAS-  
10  
11 SR).<sup>72</sup> Because depression can affect parenting, we will analyze the SAS-SR total score as well as  
12  
13 its parental functioning subscale.  
14  
15

16  
17 **Well-being** (including life satisfaction, purpose and meaning) is measured by using the 23-  
18  
19 item Neuro-QoL scale for positive affect and well-being.<sup>73</sup>  
20

21 **Grief** symptoms are measured using the Perinatal Bereavement Grief Scale (PBGS).<sup>4 74</sup>  
22  
23 Complicated grief is measured using the Inventory of Complicated Grief (ICG).<sup>75</sup> A few items on  
24  
25 the ICG were reworded to refer to perinatal loss. Given that many women present with unwarranted  
26  
27 beliefs about what caused the loss, we assess deservingness and guilt as grief outcomes using a 7-  
28  
29 item scale about loss beliefs (the Loss Beliefs Scale). This scale includes items such as “I think  
30  
31 what happened was my fault” and “The miscarriage, stillbirth, or baby's death was caused by  
32  
33 something about me.” This perinatal loss specific scale was created after reviewing the literature  
34  
35 on beliefs about deserved bad outcomes (e.g.,<sup>76-78</sup>).  
36  
37  
38  
39

40 **Fear of subsequent pregnancies** is assessed by 7-point Likert items (from 1 = Strongly  
41  
42 Disagree” to 7 = “Strongly Agree”): (1) “I am afraid to become pregnant again”; (2) “I look  
43  
44 forward to becoming pregnant again”; (3) “I plan to become pregnant again”; (4) “I worry about  
45  
46 what might happen if I get pregnant again,” (5) “I do not want to be pregnant again.”  
47  
48

49 **Treatment acceptability** is measured using the Client Satisfaction Questionnaire-Revised  
50  
51 (CSQ-8-R).<sup>79</sup>  
52

53  
54 **Treatment integrity.** We will use the IPT and CWD adherence and competence scales  
55  
56  
57  
58  
59  
60

1  
2  
3 developed in the pilot trial<sup>31</sup> to rate fidelity using audio recordings. As in the pilot trial, raters will  
4 also assess the percent of time in each group session spent discussing the perinatal loss and  
5  
6 discussing loss-related communication strategies.<sup>31</sup>  
7  
8  
9

## 10 **Analysis**

11  
12 Primary analyses will be intent-to-treat. We will examine dose-response effects in  
13 secondary analyses. Primary tests will be two-sided with  $p=0.05$ . Descriptive statistics will include  
14 effect sizes and measures of clinical significance.<sup>80</sup> Primary and secondary outcomes and all  
15 hypotheses are stated a priori, therefore 0.05 level of significance will be used. Per Kraemer,<sup>81</sup> we  
16 will not test for differences between conditions due to randomization as those differences are due  
17 to chance alone, rendering p-values meaningless. Covariates for analyses are specified a priori  
18 based on subject matter expertise. No interim analyses are planned.  
19  
20  
21  
22  
23  
24  
25  
26  
27

28 **Attrition analysis and missing data.** We will compare characteristics of those who drop  
29 out by trial arm and compare those who complete the study with those who do not to assess  
30 generalizability of findings. For the primary outcome of time to MDD recovery, unobserved time  
31 to MDD resolution for the drop-outs will be treated as censored. For secondary outcomes,  
32 regression techniques below allow for missing at random (MAR) mechanism.<sup>82</sup> If patterns of  
33 missing data indicate potential not missing at random (NMAR) mechanisms, then models  
34 describing missing mechanisms will be considered (e.g., pattern-mixture models),<sup>83 84</sup> and  
35 sensitivity analyses will be employed.  
36  
37  
38  
39  
40  
41  
42  
43  
44  
45  
46

47 **General approaches.** For survival analyses, the proportional hazard (PH) assumption will  
48 be evaluated. If it holds, then survival analyses will use Cox regression. If not, time-varying  
49 effects will be investigated, and the model will be modified to include an interaction of relevant  
50 covariates with a function of time variable. Stratified models will also be considered.  
51  
52  
53  
54  
55  
56  
57  
58  
59  
60

1  
2  
3  
4  
5  
6  
7  
8  
9  
10  
11  
12  
13  
14  
Linear mixed effects (LME) models will be used to test differences between trial arms for continuous outcomes. All participants with at least one completed post-baseline assessment will be included. We expect these scores to follow normal distributions. However, generalized linear mixed effects (GLME) modeling will be used if outcome is not normally distributed and cannot be normalized using transformations.

15  
16  
17  
18  
19  
20  
21  
22  
23  
24  
25  
26  
27  
28  
29  
30  
31  
32  
33  
34  
**Aim 1.** (1) Using survival analysis, with initial QIDS score as a covariate, we will test the hypothesis that IPT, relative to CWD, will result in reduced time to recovery from the major depressive episode (primary). (2) Using LME or GLME with baseline QIDS score as a covariate, we will test the hypothesis that IPT, relative to CWD, will result in reduced depressive symptoms (QIDS scores) across post-baseline assessments. (3) Using LME or GLME with baseline PCL score as a covariate, we will test the hypothesis that IPT, relative to CWD, will result in reduced PTSD symptoms (PCL score) across post-baseline assessments. (4) Using survival analysis, with initial PCL score as a covariate, we will test the hypothesis that IPT, relative to CWD, will result in reduced time to recovery from PTSD.

35  
36  
37  
38  
39  
40  
41  
42  
43  
44  
45  
46  
47  
48  
49  
50  
51  
52  
53  
**Aim 2.** Using baseline scores as covariates, we will separately test the hypotheses that IPT for perinatal loss will result in increased social support, social role functioning, and well-being, and decreased grief and fear of subsequent pregnancies, relative to CWD, using the LME or GLME modeling described above. Specifically, controlling for baseline values, we will use separate analyses to test the effects of IPT vs. CWD on MSPSS, Relationship Assessment Scale, SAS-SR total, SAS-SR parenting subscale, Neuro-QoL, Perinatal Bereavement Grief Scale, Inventory of Complicated Grief, Loss Belief Scale, and Fear of Subsequent Pregnancy scores. We will also compare conditions on CSQ-8-R Treatment Acceptability.

54  
55  
56  
57  
58  
59  
60  
**Aim 3.** We will test the hypotheses that social support (MSPSS scores) and grief (PBGS

1  
2  
3 scores) will mediate the effects of IPT on time to MDD recovery. To test for mediation, trial arm  
4 will be treated as the independent variable and each potential mediator (one at a time) will be tested  
5 for their effect on the outcome variable at weeks 8, 16, and 28, with the baseline value of that  
6 outcome treated as a covariate. We will use a bias corrected bootstrapping analytic strategy<sup>85 86</sup>  
7 based on 5000 bootstrap samples to estimate confidence intervals (CIs) around the indirect effect  
8 of study group on the outcome variable, through the mediator.  
9

10  
11  
12  
13  
14  
15  
16  
17 **Moderators.** We will calculate differential effect estimates and test the interactions  
18 between several participant characteristics and the intervention effect in predicting time to  
19 recovery from MDD. Characteristics to be examined include race, ethnicity, having living children,  
20 type of perinatal loss, stable use of other antidepressant or psychosocial treatment at baseline,  
21 having PTSD at baseline, having a partner, number of past depressive episodes, and time since  
22 loss. Given our emphasis on meeting the needs of minority women, we will also evaluate whether  
23 mediation relationships or intervention effects on secondary outcomes differ by race.  
24  
25  
26  
27  
28  
29  
30  
31

### 32 33 **Sample size**

34  
35 **Recovery outcomes.** For the primary outcome of time to MDD recovery (censored at 28  
36 weeks), assuming 1:1 allocation, power 0.80, two-sided tests at  $p=0.05$ , and observed estimated  
37 hazard ratio=1.79, the required number of events is 94 (number of MDEs resolved). By week  
38 28, there were 17 events in the preliminary data (17 women had MDD resolved, 11 in the IPT  
39 condition, and 6 in the CWD condition) out of 45 participants, so the rate of events was .38. Thus  
40 to have 94 events, total  $N=246$  is required. Given that 90% of pilot trial participants completed at  
41 least one follow-up assessment,<sup>31</sup> we increased the sample size to 274. Given the observed hazard  
42 ratio of 5.85 for PTSD in the pilot trial, power for PTSD recovery should be greater than 80%.  
43  
44  
45  
46  
47  
48  
49  
50  
51  
52  
53  
54  
55  
56  
57  
58  
59  
60

1  
2  
3 Tests of mediation in Aim 3 will have greater power than the primary outcome because of  
4  
5 reduction in error variance when controlling for the mediator.  
6

7  
8 Continuous (secondary) outcomes. Assuming an unadjusted  $d = .32$  and a correlation of  
9  
10 0.6 between follow-up measures and 0.3 with baseline (as observed in the preliminary data), the  
11  
12 adjusted effect size would be 0.40, and only  $n = 200$  participants would be needed before attrition.  
13  
14 If study attrition is higher, the study still has  $> 80\%$  power for secondary outcomes (Table 3).  
15

### 16 17 **Ethics and Dissemination**

18  
19 The trial was approved by Michigan State University's Biomedical Institutional Review  
20  
21 Board (FWA 00004556). A three-member external Data and Safety Monitoring Board reviews  
22  
23 data and safety of study participants. Trial safety procedures are codified through checklists and  
24  
25 a written manual of operating procedures.  
26  
27

### 28 29 **Informed consent and confidentiality**

30  
31 When potential participants contact the study, study RAs meet with them privately  
32  
33 (electronically or in person). RAs explain risks, benefits, and the voluntary nature of the study and  
34  
35 obtain participants' signed informed consent.  
36

37  
38 Confidentiality is protected by research staff trained to manage sensitive clinical issues.  
39  
40 Participants are informed about the limits of confidentiality concerning suicidal intent, homicidal  
41  
42 intent, and suspected child or elder abuse. Computer files are available only to authorized  
43  
44 personnel, with no names or obvious identifying information stored in data files. Confidentiality  
45  
46 of recordings of study assessments and treatment sessions is protected through: (1) use of  
47  
48 encrypted audio recorders and HIPAA-compliant videoconferencing; (2) labeling recordings with  
49  
50 study IDs rather than names; (3) storing recordings on a secured computer server designed to hold  
51  
52 and protect research data; and (4) limiting access to recordings.  
53  
54  
55  
56  
57  
58  
59  
60

## Participant safety

**Adverse events.** Participant safety is monitored during study assessments and during study treatment sessions. Pre-specified adverse events are recorded and monitored using a structured system created within REDCap with alerts for follow-up actions.<sup>57</sup>

**Suicide risk.** During assessments, participants who score 2 or above (any active suicide ideation) on the QIDS suicide item are transferred via warm handoff to a national suicide hotline contracted for this trial. The suicide hotline assesses suicidality and emergent treatment needs, provides follow-up, and securely transmits a written disposition. This procedure has worked well in previous trials.<sup>57</sup>

**Clinical deterioration.** If a participant develops manic or psychotic symptoms, or if her QIDS score increases by 5+ points from baseline, she is evaluated by an independent clinician to see if she needs to be referred for other treatment and/or removed from the trial.

**Treatment nonresponse.** Women in either condition whose MDD has not remitted by the end of the study (week 28) are referred for other treatment.

## Dissemination policy and access to data

Dissemination activities will include academic papers, presentations to clinical communities, community reports and talks with organizations through which we recruited, and offering to share final study results with study participants. De-identified datasets will be available to qualified investigators upon request.

1  
2  
3 **Author statement. Johnson:** Conceptualization (lead), funding acquisition (lead), investigation  
4 (lead), intervention development (equal), safety protocols (lead), writing – original draft  
5 preparation (lead), writing – review and editing (lead). **Zlotnick:** Conceptualization (supporting),  
6 funding acquisition (supporting), clinical supervision (equal), safety protocols (supporting),  
7 writing – review and editing (supporting). **Price:** Funding acquisition (supporting), intervention  
8 development (equal), clinical supervision (equal). **Sikorskii:** Conceptualization (supporting),  
9 funding acquisition (supporting), data curation, formal analysis. **Key:** Funding acquisition  
10 (supporting), recruitment strategy (supporting). **Lamphere, Taylor, Huff, and Cinader:**  
11 Recruitment strategies (lead), development of operating procedures (supporting), choice of  
12 measures (supporting).  
13  
14  
15  
16  
17  
18  
19  
20  
21  
22  
23  
24  
25

26 **Funding statement.** This work was supported by the Eunice Kennedy Shriver National Institute  
27 of Child Health and Human Development (NICHD) grant number (R01 HD100471). NICHD had  
28 no role in the design of the study and will have no role in the implementation of the study, analysis  
29 of the data, or writing of the manuscript.  
30  
31  
32  
33  
34

35 **Competing interests statement.** The authors have no competing interests.  
36  
37  
38  
39  
40  
41  
42  
43  
44  
45  
46  
47  
48  
49  
50  
51  
52  
53  
54  
55  
56  
57  
58  
59  
60



Table 1

Outline of IPT for major depressive disorder following perinatal loss

| Session name                                    | Session activities                                                                                                                                                                                                                                                                                                                                                                                                                                                                                                                                                                                                                                                                                                                                                                                 |
|-------------------------------------------------|----------------------------------------------------------------------------------------------------------------------------------------------------------------------------------------------------------------------------------------------------------------------------------------------------------------------------------------------------------------------------------------------------------------------------------------------------------------------------------------------------------------------------------------------------------------------------------------------------------------------------------------------------------------------------------------------------------------------------------------------------------------------------------------------------|
| <b>1: Emotions of grief</b>                     | <p>Each woman tells her perinatal loss story and: expresses her feelings at the time of her loss, feels and expresses her current feelings about her loss, elicits support from and supports the other group members.</p> <p>Each woman is guided to: identify current supportive people, select one person to ask for grief support, role-play how to ask for support.</p>                                                                                                                                                                                                                                                                                                                                                                                                                        |
| <b>2: Understanding what happened</b>           | <p>Each woman: explores her understanding of what happened to her pregnancy/baby, explores her thoughts/feelings about fault or blame, explores what the loss means to her, begins to explore who she has talked to about the loss and how she talks to them about her needs, identifies who she will invite to Session 3, role-plays how to communicate this invitation.</p> <p>The therapist: helps each woman unpack and examine whether there was anything she could have done to change the outcome, with support from the group, guides the women to seek information from their OBGYN providers about what does and does not contribute to perinatal loss, guides women to identify additional questions for their providers, helps each woman explore how she makes sense of her loss.</p> |
| <b>3: Grieving with others</b>                  | <p>Each woman is encouraged to invite a support person to the group. The therapist provides psychoeducation about: depression, grieving styles, ways to manage grieving differences, how IPT helps women recover and how partner/family/friend support can help women recover.</p> <p>Next the therapist guides each woman and her support person to: complete a written communication exercise about both partners' loss-related emotional needs, discuss their written answers privately for 20 minutes, discuss as a group what they learned from each other about support, discuss how each pair will manage communication with others in their social network, develop communication homework to improve each pair's support of each other regarding the loss.</p>                            |
| <b>4: Holding the memory and moving forward</b> | <p>Each woman discusses how she: holds the memory/meaning of her loss experience, can re-engage in life roles, seeks support and communication with key people, reflects on her grief process and her recovery from depression.</p> <p>The therapist guides the group by: reminding them that new members are added next week and discussing ways to welcome them, eliciting and role-modeling how to offer well-wishes to and from women completing their group treatment in this session.</p>                                                                                                                                                                                                                                                                                                    |

Table 2

## Schedule of Assessments

| Measure                                         | Baseline | Week 8 | Week 16 | Week 28 |
|-------------------------------------------------|----------|--------|---------|---------|
| <b>Diagnosis and safety</b>                     |          |        |         |         |
| SCID-5                                          | X        |        |         |         |
| Women's Experience with Battering screener      | X        |        |         |         |
| Longitudinal Interval Follow-up Examination     | X        | X      | X       | X       |
| <b>Psychiatric symptoms</b>                     |          |        |         |         |
| Quick Inventory of Depressive Symptoms          | X        | X      | X       | X       |
| Life Events Checklist and PTSD Checklist        | X        | X      | X       | X       |
| <b>Hypothesized mediators</b>                   |          |        |         |         |
| Multidim. Scale of Perceived Social Support     | X        | X      | X       | X       |
| Relationship Assessment Scale                   | X        | X      | X       | X       |
| Social Adjustment Scale total score             | X        | X      | X       | X       |
| Social Adjustment Scale parental functioning    | X        | X      | X       | X       |
| <b>Other outcomes (grief, well-being, fear)</b> |          |        |         |         |
| NIH Neuro-Quality of Life scale                 | X        | X      | X       | X       |
| Perinatal Bereavement Grief Scale               | X        | X      | X       | X       |
| Inventory of Complicated Grief                  | X        | X      | X       | X       |
| Loss Beliefs Scale                              | X        | X      | X       | X       |
| Fear of subsequent pregnancies                  | X        | X      | X       | X       |
| <b>Treatment acceptability of IPT and CWD</b>   |          |        |         |         |
| Client Satisfaction Scale – Revised             |          |        | X       |         |

Table 3

Power for n = 274 for secondary outcomes

|               | <i>d</i> = .29 | <i>d</i> = .32 | <i>d</i> = .35 |
|---------------|----------------|----------------|----------------|
| 10% attrition | .81            | <b>.88</b>     | .93            |
| 15% attrition | .74            | .83            | .88            |
| 20% attrition | .72            | .80            | .86            |
| 25% attrition | .69            | .78            | .84            |

## References

1. Armstrong DS. Emotional Distress and Prenatal Attachment in Pregnancy After Perinatal Loss. *Journal of Nursing Scholarship* 2002;34(4):339-45.
2. AmericanPregnancy. 2008 [Available from: [www.americanpregnancy.org/main/statistics.html](http://www.americanpregnancy.org/main/statistics.html) accessed June 2008.
3. Gavin N, Gaynes, BN, Lohr, KN, Meltzer-Brody, S, Gartlehner, G, & Swinson, T. Perinatal depression: A systematic review of prevalence and incidence. *Obstet Gynecol* 2005;106(5 Pt 1):1071-83.
4. Klier CM, Geller PA, Ritsher JB. Affective disorders in the aftermath of miscarriage: A comprehensive review. *Archives of Women's Mental Health* 2002;5(4):129-49.
5. Neugebauer R, Kline J, Shrout P, et al. Major depressive disorder in the 6 months after miscarriage. *JAMA: Journal of the American Medical Association* 1997;277(5):383-88.
6. Lee DTS, Wong CK, Cheung LP, et al. Psychiatric morbidity following miscarriage: A prevalence study of Chinese women in Hong Kong. *Journal of Affective Disorders* 1997;43(1):63-68.
7. Neugebauer R. Depressive symptoms at two months after miscarriage: Interpreting study findings from an epidemiological versus clinical perspective. *Depression and Anxiety Special issue: Anxiety disorders in women* 2003;17(3):152-61.
8. Neugebauer R, Kline J, O'Connor P, et al. Determinants of depressive symptoms in the early weeks after miscarriage. *American Journal of Public Health* 1992a;82(10):1332-39.
9. Neugebauer R, Kline J, O'Conner P, et al. Depressive symptoms in women in the six months after miscarriage. *American Journal of Obstetrics and Gynecology* 1992 b;166(1 Pt 1):104-09.

10. Beutel M, Deckardt, R., von Rad, M., Weiner, H. Grief and depression after miscarriage: Their separation, antecedent, and course. *Psychosomatic Medicine* 1995;57:517-26.
11. Thapar A, Thapar A. Psychological sequelae of miscarriage: a controlled study using the general health questionnaire and the hospital anxiety and depression scale. *British Journal of General Practice* 1992;42:94-96.
12. Stirtzinger RM, Robinson GE, Stewart DE, et al. Parameters of grieving in spontaneous abortion. *International Journal of Psychiatry in Medicine* 1999;29(2):235-49.
13. Gold KJ, Leon, I., Boggs, M. E., Sen, A. Depression and Posttraumatic Stress Symptoms After Perinatal Loss in a Population-Based Sample. *Journal of Women's Health* 2016;25(3):263-69.
14. Boyle FM, Vance JC, Najman JM, et al. The mental health impact of stillbirth, neonatal death or sids: Prevalence and patterns of distress among mothers. *Social Science & Medicine* 1996;43(8):1273-82.
15. Vance JC, Boyle FM, Najman JM, et al. Gender differences in parental psychological distress following perinatal death or sudden infant death syndrome. *British Journal of Psychiatry* 1995;167(6):806-11.
16. Clarke M, Williams AJ. Depression in women after perinatal death. *Lancet* 1979;1:916-17.
17. Carrera L, Diez-Domingo J, Montanana V, et al. Depression in women suffering perinatal loss. *International Journal of Gynecology & Obstetrics* 1998;62:149-53.
18. Janssen HJEM, Cuisinier MCJ, Hoogduin KAL, et al. Controlled prospective study on the mental health of women following pregnancy loss. *American Journal of Psychiatry* 1996;153(2):226-30.

- 1  
2  
3 19. Kulathilaka S, Hanwella, R., de Silva, V. A. Depressive disorder and grief following  
4  
5 spontaneous abortion. *BMC Psychiatry* 2016;16:100.  
6
- 7  
8 20. Wall-Wieler E, Roos, L. L., Bolton, J. Duration of maternal mental health-related outcomes  
9  
10 after an infants death: A retrospective matched cohort study using linkable administrative  
11  
12 data. *Depression and Anxiety* 2018;35:305-12.  
13
- 14  
15 21. Gravensteen IK, Helgadóttir, L. B., Jacobsen, E, Radestad, I., Sandset, P. M., Ekeberg, O.  
16  
17 Women's experiences in relation to stillbirth and risk factors for long-term post-traumatic  
18  
19 stress symptoms: a retrospective study. *BMJ Open* 2013;3:e003323.  
20
- 21  
22 22. Gissler M, Hemminki E, Lonnqvist J. Suicides after pregnancy in Finland, 1987-1994: Register  
23  
24 linkage study. *British Medical Journal* 1996;313(7070):1431-34.  
25
- 26  
27 23. Schiff MA, Grossman DC. Adverse perinatal outcomes and risk for postpartum suicide attempt  
28  
29 in Washington State, 1987-2001. *Pediatrics* 2006;118(3):e669-e75.  
30
- 31  
32 24. Engelhard I, van den Hout, MA, Arntz, A. Posttraumatic stress disorder after pregnancy loss.  
33  
34 *General Hospital Psychiatry* 2001;23(2):62-66.  
35
- 36  
37 25. Nikcevic AV. Development and evaluation of a miscarriage follow-up clinic. *Journal of*  
38  
39 *Reproductive and Infant Psychology* 2003;21(3):207-17.  
40
- 41  
42 26. DiMarco M, Menke, EM, McNamara, T. Evaluating a support group for perinatal loss. *The*  
43  
44 *American Journal of Maternal/Child Nursing* 2001;26(3):135-40.  
45
- 46  
47 27. McCreight B. Perinatal loss: A qualitative study in Northern Ireland. *Journal of Death and*  
48  
49 *Dying* 2008;57(1):1-19.  
50
- 51  
52 28. Conway K. Miscarriage experience and the role of support systems: A pilot study. *British*  
53  
54 *Journal of Medical Psychology* 1995;68(3):259-67.  
55  
56  
57  
58  
59  
60

- 1  
2  
3 29. Brier N. Understanding and managing the emotional reactions to miscarriage. *Obstet Gynecol*  
4  
5 1999;93:151-55.  
6  
7  
8 30. Cordle CJ, Prettyman RJ. A 2-year follow-up of women who have experienced early  
9  
10 miscarriage. *Journal of Reproductive and Infant Psychology* 1994;12(1, Jan-Mar )  
11  
12  
13 31. Johnson J, Price AB, Kao, JC, Fernandes, K. Stout, RL, Gobin, R, Zlotnick, C. Interpersonal  
14  
15 psychotherapy (IPT) for major dpression following perinatal loss: A pilot randomized  
16  
17 controlled trial. *Archives of Women's Mental Health* 2016;19(5):845-59.  
18  
19  
20 32. Crockett K, Zlotnick C, Davis M, et al. A depression preventive intervention for rural low-  
21  
22 income African-American pregnant women at risk for postpartum depression. *Arch*  
23  
24 *Womens Ment Health* 2008;11(5-6):319-25. doi: 10.1007/s00737-008-0036-3 [published  
25  
26 Online First: 2008/11/05]  
27  
28  
29 33. O'Hara MW, Stuart, S., Gorman, L.L., Wenzel, A. Efficacy of Interpersonal Psychotherapy for  
30  
31 Postpartum Depression. *Archives of General Psychiatry* 2000;57(11):1039-45.  
32  
33  
34 34. Ramezani S, Khosravi, A., Motaghi, Z., Hamidzadeh, A., Mousavi, S. A. The effect of  
35  
36 cognitive-behavioural and solution-focused counselling on prevention of postpartum  
37  
38 depression in nulliparous pregnant women. *Journal of Reproductive and Infant Psychology*  
39  
40 2017;35(2):172-82.  
41  
42  
43 35. Milgrom JD, B. G., Gemmill, Aa.a W., Holt, C., Christopher, J. Internet cognitive behavioral  
44  
45 therapy for women with postnatal depression: A randomized controlled trial of  
46  
47 MumMoodBooster. *Journal of Medical Internet Research* 2016;18(3)  
48  
49  
50 36. NOrsker F, Espenhain, L, Rogvi, S, Morgen, CS, Andersen, PK, Andersen, A. Socioeconomic  
51  
52 position and the risk of spontaneous abortion: a study within the Danish National Birth  
53  
54 Cohort. *BMJ Open* 2012;2::e001077.  
55  
56  
57  
58  
59  
60

- 1  
2  
3 37. Seaton S, Field, DJ, Draper, ES, Manktelow, BN, Smith, GCS, Springett, A, Smith, LK.  
4  
5 Socioeconomic inequalities in the rate of stillbirths by cause: a population-based study.  
6  
7 *BMJ Open* 2012;2:e001100.  
8  
9
- 10 38. Singh G, Daus, GP, Allender, M, Ramey, CT, Martin, EK, Perry, C, De Los Reyes, AA,  
11  
12 Vedamuthu, IP. Social Determinants of Health in the United States: Addressing Major  
13  
14 Health Inequality Trends for the Nation, 1935-2016. *International Journal of MCH and*  
15  
16 *AIDS* 2017;6(2):139-64.  
17  
18
- 19 39. Hobfoll SE, Ritter C, Lavin J, et al. Depression prevalence and incidence among inner-city  
20  
21 pregnant and postpartum women. *Journal of Consulting and Clinical Psychology*  
22  
23 1995;63(3):445-53.  
24  
25
- 26 40. Scholle SH, Haskett RF, Hanusa BH, et al. Addressing depression in obstetrics/gynecology  
27  
28 practice. *General Hospital Psychiatry* 2003;25(2):83-90.  
29  
30
- 31 41. Davilla M, McFall, S.L., & Cheng, D. Acculturation and depressive symptoms among pregnant  
32  
33 and postpartum Latinas. *Maternal and Child Health Journal*, 2008;13:318-25.  
34
- 35 42. Chaudron LH, Kitzman, H.J., Peifer, K.L., Morrow, S. Perez, L.M., & Newman, M.C.  
36  
37 Prevalence of maternal depressive symptoms in low-income Hispanic women. *Journal of*  
38  
39 *Clinical psychiatry* 2005;66(4):418-23.  
40  
41
- 42 43. Boury J, Larkin K, Krummel D. Factors related to postpartum depressive symptoms in low-  
43  
44 income women. *Women and Health* 2004;39(3):19-34.  
45  
46
- 47 44. Price S, Proctor E. A rural perspective on perinatal depression: Prevalence, correlates, and  
48  
49 implications for help-seeking among low-income women. *The Journal or Rural Health*  
50  
51 2009;25(2):158-66.  
52  
53  
54  
55  
56  
57  
58  
59  
60



- 1  
2  
3  
4  
5  
6  
7  
8  
9  
10  
11  
12  
13  
14  
15  
16  
17  
18  
19  
20  
21  
22  
23  
24  
25  
26  
27  
28  
29  
30  
31  
32  
33  
34  
35  
36  
37  
38  
39  
40  
41  
42  
43  
44  
45  
46  
47  
48  
49  
50  
51  
52  
53  
54  
55  
56  
57  
58  
59  
60
45. Hobfoll SE, Ritter C, Lavin J, et al. Depression prevalence and incidence among inner-city pregnant and postpartum women. *Journal of Consulting and Clinical Psychology* 1995;63(3):445-53.
  46. Morris-Rush JK, Freda, M.C., & Bernstein, P.S. Screening for postpartum depression in an inner-city population. *American Journal of Obstetrics and Gynecology* 2003;188(5):1217-19.
  47. Evans J, Heron J, H. F, et al. Cohort study of depressed mood during pregnancy and after childbirth. *British Medical Journal* 2001;323:257-60.
  48. Mukherjee S, Edwards, DRV, Baird, DD, Savitz, DA, Hartmann, KE. Risk of Miscarriage Among Black Women and White Women in a US Prospective Cohort Study. *Am J epidemiol* 2013;177(11):1271-78.
  49. Willinger M, Ko, C, Reddy, UM. Racial disparities in stillbirth risk across gestation in the United States. *Am J Obstet Gynecol* 2009;201(5):469.e1–69.e8.
  50. US\_Department\_of\_Health\_and\_Human\_Services. Infant Mortality and African Americans 2017 [Available from: <https://minorityhealth.hhs.gov/omh/browse.aspx?lvl=4&lvlid=23> accessed 12-10-2018 2018.
  51. Community\_Based\_Organization\_Partners. Community Based Organization Partners - Community Ethics Review Board (CBOP-CERB) 2021 [Available from: <https://www.hfrec.org/cerb/> accessed 9-17-21 2021.
  52. Johnson JE. Wirksamkeit von gruppenbehandlungen bei majorer depression (Efficacy of group treatments for major depressive disorder). *Gruppenpsychotherapie und Gruppendynamik*. 2009;45:181-207.

- 1  
2  
3 53. Cuijpers P. A psychoeducational approach to the treatment of depression: A meta-analysis of  
4  
5 Lewinsohn's "Coping with Depression" course. *Behavior Therapy* 1998;29:521-33.  
6  
7  
8 54. Gilbert K, & Smart, LS. Coping with infant or fetal loss: The couple's healing process. . New  
9  
10 York: Bruner/Mazel 1992.  
11  
12 55. Lewinsohn P, Antonuccio, DO, Breckenridge, JS, & Teri, L. The "Coping With Depression"  
13  
14 course. Eugene, OR: Castalia 1984.  
15  
16  
17 56. American\_Psychiatric\_Association. Diagnostic and statistical manual of mental disorders (5th  
18  
19 ed.). Washington DC: American Psychiatric Association 2013.  
20  
21  
22 57. Johnson JE, Jones, R., Miller, T., Miller, I., Stanley, B., Brown, G., Arias, SA, Cerbo, L.,  
23  
24 Rexroth, J., Fitting, J., Russell, D., Kubiak, S., Stein, M., Matkovic, C., YEn, S., Gaudiano,  
25  
26 B., Weinstock, LM. Study protocol: A randomized controlled trial of suicide risk reduction  
27  
28 in the year following jail release (the SPIRIT Trial). *Contemporary Clinical Trials*  
29  
30 2020;94:106003.  
31  
32  
33 58. Johnson, JE, Zlotnick, C. Pilot study of treatment for major depression among women prisoners  
34  
35 with substance use disorder. *Journal of Psychiatric Research* 2012;46(9):1174-83.  
36  
37  
38 59. Zlotnick CM, Ivan W., Pearlstein, T, Howard, M, Sweeney, PA. Preventive intervention for  
39  
40 pregnant women on public assistance at risk for postpartum depression. *Am J Psychiatry*  
41  
42 2006;163(8):1443-45.  
43  
44  
45 60. First M, Williams, JBW, Karg, RS, Spitzer, RL. Structured Clinical Interview for DSM-5.  
46  
47 Arlington, VA: American Psychiatric Association 2015.  
48  
49 61. Keller M, Lavori, PW, Friedman, B, Nielson, E, Endicott, J, McDonald-Scott, P, & Andreasen,  
50  
51 NC. The Longitudinal Interval Follow-up Evaluation: A comprehensive method for  
52  
53  
54  
55  
56  
57  
58  
59  
60

- 1  
2  
3 assessing outcome in prospective longitudinal studies. *Archives of General Psychiatry*  
4  
5 1987a;44:540-48.  
6  
7  
8 62. Warshaw M, Keller, MB, & Stout, R. Reliability and validity of the longitudinal interval  
9  
10 follow-up evaluation for assessing outcome of anxiety disorders. *Journal of Psychiatric*  
11  
12 *Research* 1994;28:531-45.  
13  
14  
15 63. Keller M. Past, present, and future directions for defining optimal treatment outcome in  
16  
17 depression: Remission and beyond. *JAMA* 2003;289(3152-3160)  
18  
19  
20 64. Smith P, Earp, JA, Devellis, R. Measuring battering: Development of the Women's Experience  
21  
22 with Battering (WEB) scale. *Women's Health: Research on gender, behavior, and policy*  
23  
24 1995;1(4):273-88.  
25  
26  
27 65. Rush A, Trivedi, MH, Ibrahim, HM, Carmody, TJ, Arnow, B, Klein, DN, Markowitz, JC,  
28  
29 Ninan, PT, Kornstein, S, Manber, R, Thase, ME, Kocsis, JH, Keller, MB. The 16-item  
30  
31 quick inventory of depressive symptomatology (QIDS), clinician rating (QIDS-C), and  
32  
33 self-report (QIDS-SR): A psychometric evaluation in patients with chronic major  
34  
35 depression. *Biological Psychiatry* 2003;54(5):573-83.  
36  
37  
38 66. Weathers F, Litz, BT, Keane, TM, Palmieri, PA, Marx, BP, Schnurr, PP. The PTSD  
39  
40 Checklist for DSM-5 (PCL-5). : National Center for PTSD; 2013 [Available from:  
41  
42 [www.ptsd.va.gov](http://www.ptsd.va.gov).  
43  
44  
45 67. Blevins C, Weathers, FW, Davis, MT, Witte, TK, & Domino, JL. The Posttraumatic Stress  
46  
47 Disorder Checklist for DSM-5 (PCL-5): Development and initial psychometric evaluation.  
48  
49 *Journal of Traumatic Stress*, 2015;28:489-98.  
50  
51  
52 68. Bovin M, Marx, BP, Weathers, FW, Gallagher, MW, Rodriguez, P, Schnurr, PP, and Keane,  
53  
54 TM. Psychometric properties of the PTSD Checklist for Diagnostic and Statistical Manual  
55  
56  
57  
58  
59

- of Mental Disorders-Fifth Edition (PCL-5) in Veterans. . *Psychological Assessment*, 2015;28:1379-91. .
69. Wortmann J, Jordan, AH, Weathers, FW, Resick, PA, Dondanville, KA, Hall-Clark, B., Foa, EB, Youhg-McCaughan, S., Yarvis, J, Hembree, EA, Mintz, J, Peterson, AL, Litz, BT. Psychometric analysis of the PTSD Checklist-5 (PCL-5) among treatment-seeking military service members. . *Psychological Assessment*, 2015;28:1392-403.
70. Dahlem N, Zimet, GW, Walker RR. The Multidimensional Scale of Perceived Support: A confirmation study. *Journal of Clinical Psychology* 1991;47(6):756-61.
71. Renshaw K, McKnight, P, Caska, CM, Blais, RK. The utility of the Relationship Assessment Scale in multiple types of relationships. *Journal of social and Personal Relationships* 2011;28(4):435-47.
72. Gameroff M, Wickramaratne, P., Weissman, M.M. Testing the Short and Screener versions of the Social Adjustment Scale –Self-report (SAS-SR). *Int J Methods Psychiatr Res* 2012;21(1):52-65.
73. Salsman J, Victorson, D, Choi, SW, Peterman, AH, Heinemann, AW, Nowinski, C, Cella, D. Development and validation of the positive affect and well-being scale for the neurology quality of life (Neuro-QOL) measurement system. *Qual Life Res* 2013;22(9):2569-80.
74. Ritsher J, & Neugebauer, R. Perinatal Bereavement Grief Scale: Distinguishing grief from depression following a miscarriage. *Assessment* 2002;9:31-40.
75. Prigerson H, Maciejewski, PK, & Reynolds, CF. Inventory of Complicated Grief: A scale to measure maladaptive symptoms of loss. *Psychiatry Research* 1995;59(1-2):65-79.
76. Callan M, Kay, AC, Dawtry, RJ. Making Sense of Misfortune: Deservingness, Self-Esteem, and Patterns of Self-Defeat. *J Pers Soc Psychol* 2014;107(1):142-62.

- 1  
2  
3 77. Lucas T, Alexander, S., Firestone, I. Belief in a just world, social influence and illness  
4 attributions: Evidence of a just world boomerang effect. *Journal of Health Psychology*  
5 2009;14(2):258-66.  
6  
7  
8  
9  
10 78. Glinder JG, and Compas, B. E. Self-blame attributions in women with newly diagnosed breast  
11 cancer: A prospective study of psychological adjustment. *Health Psychology*  
12 1999;18(5):475-81.  
13  
14  
15  
16 79. Attkisson, CC, Zwick, R. The Client Satisfaction Questionnaire: Psychometric properties and  
17 correlations with service utilization and psychotherapy outcome. *Evaluation and Program*  
18 *Planning* 1982;5:233-237.  
19  
20  
21  
22  
23 80. Citrome L. Compelling or irrelevant? Using number needed to treat can help decide. *Acta*  
24 *Psychiatrica Scandinavica* 2008;117(6):412-19.  
25  
26  
27  
28 81. Kraemer H. A source of false findings in published research studies: Adjusting for covariates.  
29 *JAMA Psychiatry* 2015;72:961-62.  
30  
31  
32  
33 82. Little R, Rubin M. Statistical Analysis with Missing Data. New York: Wiley and Sons 1987.  
34  
35 83. Hogan JW, Roy J, Korkontzelou C. Handling drop-out in longitudinal studies. *Statistics in*  
36 *Medicine* 2004;23(9):1455-97.  
37  
38  
39  
40 84. Shen C, Weissfeld L. Application of pattern-mixture models to outcomes that are potentially  
41 missing not at random using pseudo maximum likelihood estimation. *Biostatistics*  
42 2005;6(2):333-47.  
43  
44  
45  
46 85. Preacher KJ SJ. Advantages of Monte Carlo confidence intervals for indirect effects.  
47 *Communication Methods and Measures* 2012;6:77-98.  
48  
49  
50  
51 86. Biesanz JC FC, Savalei V. Assessing mediational models: Testing and interval estimation for  
52 indirect effects. *Multivariate Behavioral Research* 2010;45:661-701.  
53  
54  
55  
56  
57  
58  
59  
60



STANDARD PROTOCOL ITEMS: RECOMMENDATIONS FOR INTERVENTIONAL TRIALS

SPIRIT 2013 Checklist: Recommended items to address in a clinical trial protocol and related documents\*

| Section/item                      | Item No | Description                                                                                                                                                                                                                                                                              | Pages |
|-----------------------------------|---------|------------------------------------------------------------------------------------------------------------------------------------------------------------------------------------------------------------------------------------------------------------------------------------------|-------|
| <b>Administrative information</b> |         |                                                                                                                                                                                                                                                                                          |       |
| Title                             | 1       | Descriptive title identifying the study design, population, interventions, and, if applicable, trial acronym                                                                                                                                                                             | 1     |
| Trial registration                | 2a      | Trial identifier and registry name. If not yet registered, name of intended registry                                                                                                                                                                                                     | 3     |
|                                   | 2b      | All items from the World Health Organization Trial Registration Data Set                                                                                                                                                                                                                 |       |
| Protocol version                  | 3       | Date and version identifier                                                                                                                                                                                                                                                              | NA    |
| Funding                           | 4       | Sources and types of financial, material, and other support                                                                                                                                                                                                                              | 18    |
| Roles and responsibilities        | 5a      | Names, affiliations, and roles of protocol contributors                                                                                                                                                                                                                                  | 1, 18 |
|                                   | 5b      | Name and contact information for the trial sponsor                                                                                                                                                                                                                                       |       |
|                                   | 5c      | Role of study sponsor and funders, if any, in study design; collection, management, analysis, and interpretation of data; writing of the report; and the decision to submit the report for publication, including whether they will have ultimate authority over any of these activities |       |
|                                   | 5d      | Composition, roles, and responsibilities of the coordinating centre, steering committee, endpoint adjudication committee, data management team, and other individuals or groups overseeing the trial, if applicable (see Item 21a for data monitoring committee)                         |       |
| <b>Introduction</b>               |         |                                                                                                                                                                                                                                                                                          |       |
| Background and rationale          | 6a      | Description of research question and justification for undertaking the trial, including summary of relevant studies (published and unpublished) examining benefits and harms for each intervention                                                                                       | 4-6   |
|                                   | 6b      | Explanation for choice of comparators                                                                                                                                                                                                                                                    |       |
| Objectives                        | 7       | Specific objectives or hypotheses                                                                                                                                                                                                                                                        | 5     |

|    |                                                           |     |                                                                                                                                                                                                                                                                                                                                                                                |       |
|----|-----------------------------------------------------------|-----|--------------------------------------------------------------------------------------------------------------------------------------------------------------------------------------------------------------------------------------------------------------------------------------------------------------------------------------------------------------------------------|-------|
| 1  |                                                           |     |                                                                                                                                                                                                                                                                                                                                                                                |       |
| 2  | Trial design                                              | 8   | Description of trial design including type of trial (eg, parallel group, crossover, factorial, single group), allocation ratio, and framework (eg, superiority, equivalence, noninferiority, exploratory)                                                                                                                                                                      | 9     |
| 3  |                                                           |     |                                                                                                                                                                                                                                                                                                                                                                                |       |
| 4  |                                                           |     |                                                                                                                                                                                                                                                                                                                                                                                |       |
| 5  |                                                           |     |                                                                                                                                                                                                                                                                                                                                                                                |       |
| 6  |                                                           |     |                                                                                                                                                                                                                                                                                                                                                                                |       |
| 7  |                                                           |     |                                                                                                                                                                                                                                                                                                                                                                                |       |
| 8  | <b>Methods: Participants, interventions, and outcomes</b> |     |                                                                                                                                                                                                                                                                                                                                                                                |       |
| 9  |                                                           |     |                                                                                                                                                                                                                                                                                                                                                                                |       |
| 10 | Study setting                                             | 9   | Description of study settings (eg, community clinic, academic hospital) and list of countries where data will be collected. Reference to where list of study sites can be obtained                                                                                                                                                                                             | 10    |
| 11 |                                                           |     |                                                                                                                                                                                                                                                                                                                                                                                |       |
| 12 |                                                           |     |                                                                                                                                                                                                                                                                                                                                                                                |       |
| 13 |                                                           |     |                                                                                                                                                                                                                                                                                                                                                                                |       |
| 14 |                                                           |     |                                                                                                                                                                                                                                                                                                                                                                                |       |
| 15 | Eligibility criteria                                      | 10  | Inclusion and exclusion criteria for participants. If applicable, eligibility criteria for study centres and individuals who will perform the interventions (eg, surgeons, psychotherapists)                                                                                                                                                                                   | 8-9   |
| 16 |                                                           |     |                                                                                                                                                                                                                                                                                                                                                                                |       |
| 17 |                                                           |     |                                                                                                                                                                                                                                                                                                                                                                                |       |
| 18 |                                                           |     |                                                                                                                                                                                                                                                                                                                                                                                |       |
| 19 |                                                           |     |                                                                                                                                                                                                                                                                                                                                                                                |       |
| 20 | Interventions                                             | 11a | Interventions for each group with sufficient detail to allow replication, including how and when they will be administered                                                                                                                                                                                                                                                     | 6-8   |
| 21 |                                                           |     |                                                                                                                                                                                                                                                                                                                                                                                |       |
| 22 |                                                           |     |                                                                                                                                                                                                                                                                                                                                                                                |       |
| 23 |                                                           |     |                                                                                                                                                                                                                                                                                                                                                                                |       |
| 24 |                                                           |     |                                                                                                                                                                                                                                                                                                                                                                                |       |
| 25 |                                                           | 11b | Criteria for discontinuing or modifying allocated interventions for a given trial participant (eg, drug dose change in response to harms, participant request, or improving/worsening disease)                                                                                                                                                                                 | 17    |
| 26 |                                                           |     |                                                                                                                                                                                                                                                                                                                                                                                |       |
| 27 |                                                           |     |                                                                                                                                                                                                                                                                                                                                                                                |       |
| 28 |                                                           |     |                                                                                                                                                                                                                                                                                                                                                                                |       |
| 29 |                                                           |     |                                                                                                                                                                                                                                                                                                                                                                                |       |
| 30 |                                                           | 11c | Strategies to improve adherence to intervention protocols, and any procedures for monitoring adherence (eg, drug tablet return, laboratory tests)                                                                                                                                                                                                                              | 10    |
| 31 |                                                           |     |                                                                                                                                                                                                                                                                                                                                                                                |       |
| 32 |                                                           |     |                                                                                                                                                                                                                                                                                                                                                                                |       |
| 33 |                                                           |     |                                                                                                                                                                                                                                                                                                                                                                                |       |
| 34 |                                                           |     |                                                                                                                                                                                                                                                                                                                                                                                |       |
| 35 |                                                           | 11d | Relevant concomitant care and interventions that are permitted or prohibited during the trial                                                                                                                                                                                                                                                                                  | 8     |
| 36 |                                                           |     |                                                                                                                                                                                                                                                                                                                                                                                |       |
| 37 |                                                           |     |                                                                                                                                                                                                                                                                                                                                                                                |       |
| 38 | Outcomes                                                  | 12  | Primary, secondary, and other outcomes, including the specific measurement variable (eg, systolic blood pressure), analysis metric (eg, change from baseline, final value, time to event), method of aggregation (eg, median, proportion), and time point for each outcome. Explanation of the clinical relevance of chosen efficacy and harm outcomes is strongly recommended | 11-13 |
| 39 |                                                           |     |                                                                                                                                                                                                                                                                                                                                                                                |       |
| 40 |                                                           |     |                                                                                                                                                                                                                                                                                                                                                                                |       |
| 41 |                                                           |     |                                                                                                                                                                                                                                                                                                                                                                                |       |
| 42 |                                                           |     |                                                                                                                                                                                                                                                                                                                                                                                |       |
| 43 |                                                           |     |                                                                                                                                                                                                                                                                                                                                                                                |       |
| 44 |                                                           |     |                                                                                                                                                                                                                                                                                                                                                                                |       |
| 45 |                                                           |     |                                                                                                                                                                                                                                                                                                                                                                                |       |
| 46 |                                                           |     |                                                                                                                                                                                                                                                                                                                                                                                |       |
| 47 | Participant timeline                                      | 13  | Time schedule of enrolment, interventions (including any run-ins and washouts), assessments, and visits for participants. A schematic diagram is highly recommended (see Figure)                                                                                                                                                                                               | 20    |
| 48 |                                                           |     |                                                                                                                                                                                                                                                                                                                                                                                |       |
| 49 |                                                           |     |                                                                                                                                                                                                                                                                                                                                                                                |       |
| 50 |                                                           |     |                                                                                                                                                                                                                                                                                                                                                                                |       |
| 51 |                                                           |     |                                                                                                                                                                                                                                                                                                                                                                                |       |
| 52 |                                                           |     |                                                                                                                                                                                                                                                                                                                                                                                |       |
| 53 | Sample size                                               | 14  | Estimated number of participants needed to achieve study objectives and how it was determined, including clinical and statistical assumptions supporting any sample size calculations                                                                                                                                                                                          | 15-16 |
| 54 |                                                           |     |                                                                                                                                                                                                                                                                                                                                                                                |       |
| 55 |                                                           |     |                                                                                                                                                                                                                                                                                                                                                                                |       |
| 56 |                                                           |     |                                                                                                                                                                                                                                                                                                                                                                                |       |
| 57 |                                                           |     |                                                                                                                                                                                                                                                                                                                                                                                |       |
| 58 |                                                           |     |                                                                                                                                                                                                                                                                                                                                                                                |       |
| 59 |                                                           |     |                                                                                                                                                                                                                                                                                                                                                                                |       |
| 60 |                                                           |     |                                                                                                                                                                                                                                                                                                                                                                                |       |

|    |                                                                     |     |                                                                                                                                                                                                                                                                                                                                                                                                              |              |
|----|---------------------------------------------------------------------|-----|--------------------------------------------------------------------------------------------------------------------------------------------------------------------------------------------------------------------------------------------------------------------------------------------------------------------------------------------------------------------------------------------------------------|--------------|
| 1  |                                                                     |     |                                                                                                                                                                                                                                                                                                                                                                                                              |              |
| 2  | Recruitment                                                         | 15  | Strategies for achieving adequate participant enrollment to reach target sample size                                                                                                                                                                                                                                                                                                                         | <b>9-10</b>  |
| 3  |                                                                     |     |                                                                                                                                                                                                                                                                                                                                                                                                              |              |
| 4  |                                                                     |     |                                                                                                                                                                                                                                                                                                                                                                                                              |              |
| 5  | <b>Methods: Assignment of interventions (for controlled trials)</b> |     |                                                                                                                                                                                                                                                                                                                                                                                                              |              |
| 6  |                                                                     |     |                                                                                                                                                                                                                                                                                                                                                                                                              |              |
| 7  | Allocation:                                                         |     |                                                                                                                                                                                                                                                                                                                                                                                                              | <b>9</b>     |
| 8  |                                                                     |     |                                                                                                                                                                                                                                                                                                                                                                                                              |              |
| 9  | Sequence generation                                                 | 16a | Method of generating the allocation sequence (eg, computer-generated random numbers), and list of any factors for stratification. To reduce predictability of a random sequence, details of any planned restriction (eg, blocking) should be provided in a separate document that is unavailable to those who enrol participants or assign interventions                                                     | <b>9</b>     |
| 10 |                                                                     |     |                                                                                                                                                                                                                                                                                                                                                                                                              |              |
| 11 |                                                                     |     |                                                                                                                                                                                                                                                                                                                                                                                                              |              |
| 12 |                                                                     |     |                                                                                                                                                                                                                                                                                                                                                                                                              |              |
| 13 |                                                                     |     |                                                                                                                                                                                                                                                                                                                                                                                                              |              |
| 14 |                                                                     |     |                                                                                                                                                                                                                                                                                                                                                                                                              |              |
| 15 |                                                                     |     |                                                                                                                                                                                                                                                                                                                                                                                                              |              |
| 16 |                                                                     |     |                                                                                                                                                                                                                                                                                                                                                                                                              |              |
| 17 |                                                                     |     |                                                                                                                                                                                                                                                                                                                                                                                                              |              |
| 18 | Allocation concealment mechanism                                    | 16b | Mechanism of implementing the allocation sequence (eg, central telephone; sequentially numbered, opaque, sealed envelopes), describing any steps to conceal the sequence until interventions are assigned                                                                                                                                                                                                    | <b>9</b>     |
| 19 |                                                                     |     |                                                                                                                                                                                                                                                                                                                                                                                                              |              |
| 20 |                                                                     |     |                                                                                                                                                                                                                                                                                                                                                                                                              |              |
| 21 |                                                                     |     |                                                                                                                                                                                                                                                                                                                                                                                                              |              |
| 22 |                                                                     |     |                                                                                                                                                                                                                                                                                                                                                                                                              |              |
| 23 |                                                                     |     |                                                                                                                                                                                                                                                                                                                                                                                                              |              |
| 24 | Implementation                                                      | 16c | Who will generate the allocation sequence, who will enrol participants, and who will assign participants to interventions                                                                                                                                                                                                                                                                                    | <b>9</b>     |
| 25 |                                                                     |     |                                                                                                                                                                                                                                                                                                                                                                                                              |              |
| 26 |                                                                     |     |                                                                                                                                                                                                                                                                                                                                                                                                              |              |
| 27 |                                                                     |     |                                                                                                                                                                                                                                                                                                                                                                                                              |              |
| 28 | Blinding (masking)                                                  | 17a | Who will be blinded after assignment to interventions (eg, trial participants, care providers, outcome assessors, data analysts), and how                                                                                                                                                                                                                                                                    | <b>10</b>    |
| 29 |                                                                     |     |                                                                                                                                                                                                                                                                                                                                                                                                              |              |
| 30 |                                                                     |     |                                                                                                                                                                                                                                                                                                                                                                                                              |              |
| 31 |                                                                     |     |                                                                                                                                                                                                                                                                                                                                                                                                              |              |
| 32 |                                                                     |     |                                                                                                                                                                                                                                                                                                                                                                                                              |              |
| 33 |                                                                     | 17b | If blinded, circumstances under which unblinding is permissible, and procedure for revealing a participant's allocated intervention during the trial                                                                                                                                                                                                                                                         | <b>NA</b>    |
| 34 |                                                                     |     |                                                                                                                                                                                                                                                                                                                                                                                                              |              |
| 35 |                                                                     |     |                                                                                                                                                                                                                                                                                                                                                                                                              |              |
| 36 |                                                                     |     |                                                                                                                                                                                                                                                                                                                                                                                                              |              |
| 37 | <b>Methods: Data collection, management, and analysis</b>           |     |                                                                                                                                                                                                                                                                                                                                                                                                              |              |
| 38 |                                                                     |     |                                                                                                                                                                                                                                                                                                                                                                                                              |              |
| 39 | Data collection methods                                             | 18a | Plans for assessment and collection of outcome, baseline, and other trial data, including any related processes to promote data quality (eg, duplicate measurements, training of assessors) and a description of study instruments (eg, questionnaires, laboratory tests) along with their reliability and validity, if known. Reference to where data collection forms can be found, if not in the protocol | <b>11-13</b> |
| 40 |                                                                     |     |                                                                                                                                                                                                                                                                                                                                                                                                              |              |
| 41 |                                                                     |     |                                                                                                                                                                                                                                                                                                                                                                                                              |              |
| 42 |                                                                     |     |                                                                                                                                                                                                                                                                                                                                                                                                              |              |
| 43 |                                                                     |     |                                                                                                                                                                                                                                                                                                                                                                                                              |              |
| 44 |                                                                     |     |                                                                                                                                                                                                                                                                                                                                                                                                              |              |
| 45 |                                                                     |     |                                                                                                                                                                                                                                                                                                                                                                                                              |              |
| 46 |                                                                     |     |                                                                                                                                                                                                                                                                                                                                                                                                              |              |
| 47 |                                                                     |     |                                                                                                                                                                                                                                                                                                                                                                                                              |              |
| 48 |                                                                     |     |                                                                                                                                                                                                                                                                                                                                                                                                              |              |
| 49 |                                                                     | 18b | Plans to promote participant retention and complete follow-up, including list of any outcome data to be collected for participants who discontinue or deviate from intervention protocols                                                                                                                                                                                                                    | <b>10</b>    |
| 50 |                                                                     |     |                                                                                                                                                                                                                                                                                                                                                                                                              |              |
| 51 |                                                                     |     |                                                                                                                                                                                                                                                                                                                                                                                                              |              |
| 52 |                                                                     |     |                                                                                                                                                                                                                                                                                                                                                                                                              |              |
| 53 |                                                                     |     |                                                                                                                                                                                                                                                                                                                                                                                                              |              |
| 54 | Data management                                                     | 19  | Plans for data entry, coding, security, and storage, including any related processes to promote data quality (eg, double data entry; range checks for data values). Reference to where details of data management procedures can be found, if not in the protocol                                                                                                                                            | <b>16</b>    |
| 55 |                                                                     |     |                                                                                                                                                                                                                                                                                                                                                                                                              |              |
| 56 |                                                                     |     |                                                                                                                                                                                                                                                                                                                                                                                                              |              |
| 57 |                                                                     |     |                                                                                                                                                                                                                                                                                                                                                                                                              |              |
| 58 |                                                                     |     |                                                                                                                                                                                                                                                                                                                                                                                                              |              |
| 59 |                                                                     |     |                                                                                                                                                                                                                                                                                                                                                                                                              |              |
| 60 |                                                                     |     |                                                                                                                                                                                                                                                                                                                                                                                                              |              |



|    |             |     |                                                               |              |
|----|-------------|-----|---------------------------------------------------------------|--------------|
| 1  |             |     |                                                               |              |
| 2  | Statistical | 20a | Statistical methods for analysing primary and secondary       | <b>13-15</b> |
| 3  | methods     |     | outcomes. Reference to where other details of the statistical |              |
| 4  |             |     | analysis plan can be found, if not in the protocol            |              |
| 5  |             |     |                                                               |              |
| 6  |             | 20b | Methods for any additional analyses (eg, subgroup and         | <b>13-15</b> |
| 7  |             |     | adjusted analyses)                                            |              |
| 8  |             |     |                                                               |              |
| 9  |             | 20c | Definition of analysis population relating to protocol non-   | <b>13-15</b> |
| 10 |             |     | adherence (eg, as randomised analysis), and any statistical   |              |
| 11 |             |     | methods to handle missing data (eg, multiple imputation)      |              |
| 12 |             |     |                                                               |              |
| 13 |             |     |                                                               |              |

### Methods: Monitoring

|    |                 |     |                                                                  |           |
|----|-----------------|-----|------------------------------------------------------------------|-----------|
| 14 |                 |     |                                                                  |           |
| 15 |                 |     |                                                                  |           |
| 16 | Data monitoring | 21a | Composition of data monitoring committee (DMC); summary          | <b>NA</b> |
| 17 |                 |     | of its role and reporting structure; statement of whether it is  |           |
| 18 |                 |     | independent from the sponsor and competing interests; and        |           |
| 19 |                 |     | reference to where further details about its charter can be      |           |
| 20 |                 |     | found, if not in the protocol. Alternatively, an explanation of  |           |
| 21 |                 |     | why a DMC is not needed                                          |           |
| 22 |                 |     |                                                                  |           |
| 23 |                 |     |                                                                  |           |
| 24 |                 | 21b | Description of any interim analyses and stopping guidelines,     | <b>13</b> |
| 25 |                 |     | including who will have access to these interim results and      |           |
| 26 |                 |     | make the final decision to terminate the trial                   |           |
| 27 |                 |     |                                                                  |           |
| 28 | Harms           | 22  | Plans for collecting, assessing, reporting, and managing         | <b>17</b> |
| 29 |                 |     | solicited and spontaneously reported adverse events and          |           |
| 30 |                 |     | other unintended effects of trial interventions or trial conduct |           |
| 31 |                 |     |                                                                  |           |
| 32 |                 |     |                                                                  |           |
| 33 | Auditing        | 23  | Frequency and procedures for auditing trial conduct, if any,     | <b>NA</b> |
| 34 |                 |     | and whether the process will be independent from                 |           |
| 35 |                 |     | investigators and the sponsor                                    |           |
| 36 |                 |     |                                                                  |           |
| 37 |                 |     |                                                                  |           |

### Ethics and dissemination

|    |                 |     |                                                              |           |
|----|-----------------|-----|--------------------------------------------------------------|-----------|
| 38 |                 |     |                                                              |           |
| 39 |                 |     |                                                              |           |
| 40 | Research ethics | 24  | Plans for seeking research ethics committee/institutional    | <b>16</b> |
| 41 | approval        |     | review board (REC/IRB) approval                              |           |
| 42 |                 |     |                                                              |           |
| 43 | Protocol        | 25  | Plans for communicating important protocol modifications     | <b>NA</b> |
| 44 | amendments      |     | (eg, changes to eligibility criteria, outcomes, analyses) to |           |
| 45 |                 |     | relevant parties (eg, investigators, REC/IRBs, trial         |           |
| 46 |                 |     | participants, trial registries, journals, regulators)        |           |
| 47 |                 |     |                                                              |           |
| 48 | Consent or      | 26a | Who will obtain informed consent or assent from potential    | <b>16</b> |
| 49 | assent          |     | trial participants or authorised surrogates, and how (see    |           |
| 50 |                 |     | Item 32)                                                     |           |
| 51 |                 |     |                                                              |           |
| 52 |                 |     |                                                              |           |
| 53 |                 | 26b | Additional consent provisions for collection and use of      | <b>NA</b> |
| 54 |                 |     | participant data and biological specimens in ancillary       |           |
| 55 |                 |     | studies, if applicable                                       |           |
| 56 |                 |     |                                                              |           |
| 57 |                 |     |                                                              |           |
| 58 |                 |     |                                                              |           |
| 59 |                 |     |                                                              |           |
| 60 |                 |     |                                                              |           |

|    |                   |     |                                                                 |                |
|----|-------------------|-----|-----------------------------------------------------------------|----------------|
| 1  |                   |     |                                                                 |                |
| 2  | Confidentiality   | 27  | How personal information about potential and enrolled           | <b>16</b>      |
| 3  |                   |     | participants will be collected, shared, and maintained in       |                |
| 4  |                   |     | order to protect confidentiality before, during, and after the  |                |
| 5  |                   |     | trial                                                           |                |
| 6  |                   |     |                                                                 |                |
| 7  | Declaration of    | 28  | Financial and other competing interests for principal           | <b>18</b>      |
| 8  | interests         |     | investigators for the overall trial and each study site         |                |
| 9  |                   |     |                                                                 |                |
| 10 | Access to data    | 29  | Statement of who will have access to the final trial dataset,   | <b>17</b>      |
| 11 |                   |     | and disclosure of contractual agreements that limit such        |                |
| 12 |                   |     | access for investigators                                        |                |
| 13 |                   |     |                                                                 |                |
| 14 |                   |     |                                                                 |                |
| 15 | Ancillary and     | 30  | Provisions, if any, for ancillary and post-trial care, and for  | <b>17</b>      |
| 16 | post-trial care   |     | compensation to those who suffer harm from trial                |                |
| 17 |                   |     | participation                                                   |                |
| 18 |                   |     |                                                                 |                |
| 19 | Dissemination     | 31a | Plans for investigators and sponsor to communicate trial        | <b>17</b>      |
| 20 | policy            |     | results to participants, healthcare professionals, the public,  |                |
| 21 |                   |     | and other relevant groups (eg, via publication, reporting in    |                |
| 22 |                   |     | results databases, or other data sharing arrangements),         |                |
| 23 |                   |     | including any publication restrictions                          |                |
| 24 |                   |     |                                                                 |                |
| 25 |                   |     |                                                                 |                |
| 26 |                   | 31b | Authorship eligibility guidelines and any intended use of       | <b>NA</b>      |
| 27 |                   |     | professional writers                                            |                |
| 28 |                   |     |                                                                 |                |
| 29 |                   | 31c | Plans, if any, for granting public access to the full protocol, | <b>17</b>      |
| 30 |                   |     | participant-level dataset, and statistical code                 |                |
| 31 |                   |     |                                                                 |                |
| 32 |                   |     |                                                                 |                |
| 33 | <b>Appendices</b> |     |                                                                 |                |
| 34 |                   |     |                                                                 |                |
| 35 | Informed consent  | 32  | Model consent form and other related documentation given        | <b>attache</b> |
| 36 | materials         |     | to participants and authorised surrogates                       | <b>d</b>       |
| 37 |                   |     |                                                                 |                |
| 38 | Biological        | 33  | Plans for collection, laboratory evaluation, and storage of     | <b>NA</b>      |
| 39 | specimens         |     | biological specimens for genetic or molecular analysis in the   |                |
| 40 |                   |     | current trial and for future use in ancillary studies, if       |                |
| 41 |                   |     | applicable                                                      |                |
| 42 |                   |     |                                                                 |                |
| 43 |                   |     |                                                                 |                |

\*It is strongly recommended that this checklist be read in conjunction with the SPIRIT 2013 Explanation & Elaboration for important clarification on the items. Amendments to the protocol should be tracked and dated. The SPIRIT checklist is copyrighted by the SPIRIT Group under the Creative Commons "[Attribution-NonCommercial-NoDerivs 3.0 Unported](https://creativecommons.org/licenses/by-nc-nd/3.0/)" license.

# BMJ Open

## Protocol for the Healing After Loss (HeAL) Study: A randomized controlled trial of interpersonal psychotherapy (IPT) for major depression following perinatal loss

|                                 |                                                                                                                                                                                                                                                                                                                                                                                                                                                                                                                                                                                                                                                                                                                                      |
|---------------------------------|--------------------------------------------------------------------------------------------------------------------------------------------------------------------------------------------------------------------------------------------------------------------------------------------------------------------------------------------------------------------------------------------------------------------------------------------------------------------------------------------------------------------------------------------------------------------------------------------------------------------------------------------------------------------------------------------------------------------------------------|
| Journal:                        | <i>BMJ Open</i>                                                                                                                                                                                                                                                                                                                                                                                                                                                                                                                                                                                                                                                                                                                      |
| Manuscript ID                   | bmjopen-2021-057747.R3                                                                                                                                                                                                                                                                                                                                                                                                                                                                                                                                                                                                                                                                                                               |
| Article Type:                   | Protocol                                                                                                                                                                                                                                                                                                                                                                                                                                                                                                                                                                                                                                                                                                                             |
| Date Submitted by the Author:   | 21-Mar-2022                                                                                                                                                                                                                                                                                                                                                                                                                                                                                                                                                                                                                                                                                                                          |
| Complete List of Authors:       | Johnson, Jennifer; Michigan State University College of Human Medicine, OBGYN<br>Price, Ann B.; Warren Alpert Medical School of Brown University, Department of Psychiatry<br>Sikorskii, Alla; Michigan State University College of Osteopathic Medicine, Department of Psychiatry<br>Key, Kent; Michigan State University College of Human Medicine<br>Taylor, Brandon; Michigan State University College of Human Medicine<br>Lamphere, Susan; Michigan State University College of Human Medicine<br>Huff, Christine; Michigan State University College of Human Medicine<br>Cinader, Morgan; Michigan State University College of Human Medicine<br>Zlotnick, Caron; Butler Hospital; Women and Infants Hospital of Rhode Island |
| <b>Primary Subject Heading</b>: | Mental health                                                                                                                                                                                                                                                                                                                                                                                                                                                                                                                                                                                                                                                                                                                        |
| Secondary Subject Heading:      | Obstetrics and gynaecology, General practice / Family practice                                                                                                                                                                                                                                                                                                                                                                                                                                                                                                                                                                                                                                                                       |
| Keywords:                       | Depression & mood disorders < PSYCHIATRY, Adult psychiatry < PSYCHIATRY, Maternal medicine < OBSTETRICS                                                                                                                                                                                                                                                                                                                                                                                                                                                                                                                                                                                                                              |
|                                 |                                                                                                                                                                                                                                                                                                                                                                                                                                                                                                                                                                                                                                                                                                                                      |

SCHOLARONE™  
Manuscripts

1  
2  
3 Running Head: PERINATAL LOSS  
4

5 Protocol for the Healing After Loss (HeAL) Study: A randomized controlled trial of  
6 interpersonal psychotherapy (IPT) for major depression following perinatal loss  
7  
8

9 Jennifer E. Johnson, Michigan State University College of Human Medicine, 200 East 1<sup>st</sup> St, Flint,  
10 MI 48503, USA. JJohns@msu.edu  
11  
12

13 Ann B. Price, Department of Psychiatry and Human Behavior, Alpert Medical School of Brown  
14 University, 700 Butler Ave, Providence, RI 02906, USA. Ann\_Back\_Price@brown.edu  
15  
16

17 Alla Sikorskii, Michigan State University College of Osteopathic Medicine, Department of  
18 Psychiatry, 909 Wilson Rd, East Lansing, MI 48824, USA. Sikorska@msu.edu  
19  
20

21 Kent D. Key, Michigan State University College of Human Medicine, 200 East 1<sup>st</sup> St, Flint, MI  
22 48503, USA. KeyKent@msu.edu  
23  
24

25 Brandon Taylor, Michigan State University College of Human Medicine, 200 East 1<sup>st</sup> St, Flint, MI  
26 48503, USA. Tay11214@msu.edu  
27  
28

29 Susan Lamphere, Michigan State University College of Human Medicine, 200 East 1<sup>st</sup> St, Flint,  
30 MI 48503, USA. Lamphe14@msu.edu  
31  
32

33 Christine Huff, Michigan State University College of Human Medicine, 200 East 1<sup>st</sup> St, Flint, MI  
34 48503, USA. HuffChr5@msu.edu  
35  
36

37 Morgan Cinader, Michigan State University College of Human Medicine, 200 East 1<sup>st</sup> St, Flint,  
38 MI 48503, USA. CinaderM@msu.edu  
39  
40

41 Caron Zlotnick, Butler Hospital and Women and Infants Hospital, 345 Blackstone Blvd,  
42 Providence, RI 02906, USA. University of Cape Town, Cape Town, South Africa.  
43  
44  
45  
46 Caron\_Zlotnick@brown.edu  
47

48 Corresponding Author: Jennifer E. Johnson, Michigan State University College of Human  
49 Medicine, 200 East 1<sup>st</sup> St, Flint, MI 48503, USA. JJohns@msu.edu  
50  
51  
52  
53  
54  
55  
56  
57  
58  
59  
60

## Abstract

**Introduction.** This protocol describes a study testing the efficacy of interpersonal psychotherapy (IPT) for major depressive disorder following perinatal loss (early and late fetal death and early neonatal death). Perinatal loss is associated with elevated risk of major depressive disorder and posttraumatic stress disorder (PTSD). Perinatal loss conveys specific treatment needs. The trial will be the first fully-powered randomized trial of treatment for any psychiatric disorder following perinatal loss.

**Methods and analysis.** A sample of 274 women in Flint and Detroit areas in Michigan who experience a major depressive episode following a perinatal loss will be randomized to group IPT for perinatal loss or to group Coping with Depression (CWD). We anticipate that 50% of the sample will have co-occurring PTSD. Assessments occur at baseline, mid-treatment (8 weeks), post-treatment (16 weeks), and follow-up (28 weeks). Clinical outcomes include time to recovery from major depressive episode (primary), depressive symptoms, PTSD symptoms, and time to recovery from PTSD. Additional outcomes include social support, social role functioning (including parental functioning for those with living children), well-being, grief (including complicated grief and fault beliefs), and fear of subsequent pregnancies. Social support and grief are hypothesized mediators of IPT effects on time to recovery from major depressive episode.

**Ethics and dissemination.** The trial was approved by Michigan State University's Biomedical Institutional Review Board. It has a Data and Safety Monitoring Board and has been submitted to the Community Based Organization Partners Community Ethics Review Board. Written operating procedures outline methods for protecting confidentiality, monitoring and recording adverse events, and safeguarding participants. We will share study results with research and clinical communities, community organizations through which we recruited, and will offer results to study

1  
2  
3 participants. De-identified datasets will be available through the National Institute of Mental  
4  
5 Health Data Archive and to qualified investigators upon request.  
6  
7  
8  
9

10 **Clinical trials registration.** The trial was registered at [clinicaltrials.gov](https://clinicaltrials.gov) (NCT04629599).  
11

12 **Key words:** Miscarriage, stillbirth, fetal death, perinatal death, major depressive disorder,  
13  
14 posttraumatic stress disorder, interpersonal psychotherapy.  
15

16 **Word count:** 4,034  
17  
18  
19  
20  
21

### 22 **Article Summary: Strengths and limitations of this study**

- 23  
24 • This study addresses a clinical need, and will provide an evidence base for treating a n  
25  
26 understudied population whose distress has historically been minimized.  
27
- 28  
29 • The trial will have strong representation from disparities populations (especially African  
30  
31 American women and socioeconomically disadvantaged women) who experience higher  
32  
33 rates of perinatal loss, increasing its significance.  
34
- 35  
36 • Rigor and reproducibility are ensured by the randomized design, clear inclusion criteria,  
37  
38 use of well-established research, recruitment, and retention methods, use of reliable and  
39  
40 valid measures, the use of raters blinded to treatment condition, and transparent power and  
41  
42 statistical analyses.  
43
- 44  
45 • Intervention strengths include clearly distinct treatment conditions, use of manualized  
46  
47 treatment protocols and fidelity assessments, and team members with decades of clinical  
48  
49 experience responding to perinatal loss.  
50
- 51  
52 • Challenges may include recruitment during a global pandemic in communities with a  
53  
54 higher levels of research mistrust and more mental health stigma than in the pilot trial.  
55  
56  
57  
58  
59  
60

## Introduction

1  
2  
3  
4  
5  
6  
7  
8  
9  
10  
11  
12  
13  
14  
15  
16  
17  
18  
19  
20  
21  
22  
23  
24  
25  
26  
27  
28  
29  
30  
31  
32  
33  
34  
35  
36  
37  
38  
39  
40  
41  
42  
43  
44  
45  
46  
47  
48  
49  
50  
51  
52  
53  
54  
55  
56  
57  
58  
59  
60

About 650,000 women in the United States experience perinatal loss each year (including early and late fetal death and the death of a liveborn neonate within the first 28 days).<sup>1 2</sup> Rates of major depressive disorder (MDD) after perinatal loss are higher than after giving birth to a living infant, and are 3 times the rates among matched samples of community women.<sup>3-20</sup> Rates of posttraumatic stress disorder (PTSD) after perinatal loss are up to 7 times the rates of PTSD among mothers of living infants,<sup>13</sup> and elevated PTSD symptoms can occur for years after the loss.<sup>21</sup> Fetal or neonatal death triples rates of suicide and of hospitalization for suicide attempts.<sup>22 23</sup>

Not only do women with perinatal loss have higher rates of MDD and PTSD than mothers of living infants, their needs also differ from needs following many other kinds of bereavement. In perinatal loss, the fact of bereavement is compounded by the physical experience of miscarriage or of delivering a baby that has already died.<sup>24</sup> Many women experiencing perinatal loss grieve in secret, as others may not know about the loss. Even if others do know, there are few social norms that guide how others can or should support the bereaved, making support less likely and often less helpful (e.g., “you can just have another one”).<sup>12 25</sup> Reasons for loss are often unclear and many women blame themselves.

Despite recognition that MDD (with or without co-occurring PTSD) following perinatal loss causes impairment and that treatment as usual is often inadequate,<sup>26-30</sup> our previous pilot work<sup>31</sup> created and tested the first manual for treating any psychiatric disorder after perinatal loss. The manual is structured and applies interpersonal psychotherapy (IPT) principles to MDD following perinatal loss in a group format. Previous IPT and other treatment manuals for perinatal depression<sup>32-35</sup> focus on helping women adjust their relationships, identity, roles, and routines to the demands of a new baby. This is inappropriate in the context of perinatal loss. Our manual

1  
2  
3 applies IPT social support and communication principles to issues such as resolving conflicts over  
4  
5 how to respond to the loss, grieving and requesting support in the absence of social norms about  
6  
7 how to do so, and resolving questions of fault and role competence. It can be used by providers  
8  
9 who do not know IPT. A randomized pilot trial of women experiencing MDD following perinatal  
10  
11 loss established acceptability of proposed study procedures and identified high rates of co-  
12  
13 occurring PTSD (54%) among study participants.<sup>31</sup> Results favored the new IPT manual for PTSD  
14  
15 recovery, treatment satisfaction, depressive symptoms, grief, and social support relative to Coping  
16  
17 with Depression (CWD), a cognitive-behavioral based intervention that does not focus on perinatal  
18  
19 loss, interpersonal issues, or social support.<sup>31</sup>  
20  
21  
22  
23

24 Based on those promising results, the current study will be the first fully-powered  
25  
26 randomized trial of treatment for any psychiatric disorder following perinatal loss. We will  
27  
28 compare our group IPT manual to a general group depression treatment (CWD) in a sample of 274  
29  
30 women experiencing MDD in the context of perinatal loss. The trial will test the hypotheses that:  
31  
32

- 33 1. IPT for perinatal loss will result in reduced time to recovery from MDD (primary),  
34  
35 depressive symptoms, and PTSD symptoms, relative to CWD. Among women meeting  
36  
37 criteria for PTSD, IPT will result in reduced time to recovery from PTSD relative to CWD.  
38  
39
- 40 2. IPT for perinatal loss will result in increased social support, social role functioning  
41  
42 (including parental functioning for women with living children), and well-being, and  
43  
44 decreased grief and fear of subsequent pregnancies, relative to CWD.  
45  
46
- 47 3. Social support and grief will mediate the effects of IPT on time to MDD recovery.  
48

49 This trial will provide an evidence base for treating a vulnerable and understudied population  
50  
51 whose distress has historically been minimized. Given that poverty increases risk of perinatal  
52  
53 loss,<sup>36-38</sup> and doubles the risk of perinatal depression,<sup>39-47</sup> and that rates of perinatal loss for  
54  
55  
56  
57  
58  
59



1  
2  
3 African-American women are double those for white women,<sup>48-50</sup> the location of the trial in  
4 Southeast Michigan, which includes Flint and Detroit (minority-majority cities with high rates of  
5 poverty), increases the trial's significance.  
6  
7  
8

## 9 10 **Methods and analysis**

### 11 12 **Patient and public involvement**

13  
14 Research questions arose from a clinical need identified by provider colleagues. Patients  
15 provided feedback on treatments, measures, and study procedures in the pilot trial.<sup>31</sup> Local  
16 minority-led community-based organizations provided feedback on measures, procedures, and  
17 recruitment methods appropriate for the Flint and Detroit areas. The study team is embedded in  
18 Flint and Detroit. Team members have lived experience. The trial has been submitted for voluntary  
19 review by the Flint-based Community Based Organization Partners Community Ethics Review  
20 Board for additional community feedback.<sup>51</sup>  
21  
22  
23  
24  
25  
26  
27  
28  
29

### 30 31 **Rationale for design**

32  
33 Given that no other treatment exists for women who experience perinatal-loss related MDD  
34 that could be used as a comparator condition, we chose to use a general depression treatment, the  
35 Coping With Depression (CWD) course, as a control condition. We chose CWD because it is the  
36 group treatment with the most empirical support for treating MDD<sup>52 53</sup> and because it is distinct  
37 from IPT. IPT addresses MDD through emotional exploration, work on relationships,  
38 communication, grief, and social support. CWD addresses MDD by changing thinking and  
39 behavior; it focuses on skills for reducing depression in general and does not have perinatal-loss  
40 specific components. Our IPT treatment differs from CWD in its focus on exploring reactions to  
41 the loss, addressing loss-related interpersonal challenges, and improving loss-related social  
42 support and grief-specific coping. The trial's secondary outcomes (social support, social  
43  
44  
45  
46  
47  
48  
49  
50  
51  
52  
53  
54  
55  
56  
57  
58  
59  
60

1  
2  
3 functioning, grief) assess hypothesized differences between treatments. As desired, our pilot study  
4 found differences between conditions in the hypothesized mechanisms of social support and grief  
5 and in terms of in-session activities.<sup>31</sup>  
6  
7  
8

## 9 10 **Treatments**

11  
12 Manualized treatments are attention-matched (12 groups of 90 minutes each, 1 individual  
13 pre-group session, and 1 booster session). Every 4 weeks, both treatments allow new women to  
14 enter the group and women completing 12 weeks to leave the group.  
15  
16  
17

18  
19 **Interpersonal psychotherapy (IPT).** Participants in the IPT condition receive 12 group  
20 sessions and 2 individual (pre-group and 1-month booster) sessions as outlined in the structured  
21 manual (see Table 1 and pilot trial<sup>31</sup>). The individual sessions prepare patients to use the group  
22 effectively, to keep group members focused on their treatment goals, and to maintain treatment  
23 gains. In addition, 3 of the 12 group sessions invite women to include their partners or other  
24 support people to bolster the woman's social support system and to reduce conflicts over how to  
25 react to the loss. Relationship distress is common following perinatal loss.<sup>12 54</sup>  
26  
27  
28  
29  
30  
31  
32  
33

34  
35 Group sessions are semi-structured, and each woman covers the four group topics listed in  
36 Table 1 three times over her 12 group sessions, approaching each topic from a different stage in  
37 the mourning process. New women are allowed to enter group every four sessions. This allows  
38 remaining women to see their own progress and encourages new women through example and  
39 peer counseling.  
40  
41  
42  
43  
44  
45

46  
47 **Coping with Depression (CWD).** CWD is a structured, manualized<sup>55</sup> psycho-educational  
48 group treatment for MDD. The CWD course is cognitive-behavioral. The problems shown by  
49 depressed individuals are viewed as behavioral, with cognitive patterns that can be unlearned or  
50 relearned. Its effectiveness is comparable to other forms of psychotherapy in depression.<sup>53</sup> The  
51  
52  
53  
54  
55  
56  
57  
58  
59  
60

1  
2  
3 course content teaches skills including relaxation, cognitive skills, and behavioral activation. The  
4  
5 CWD pre-group and booster sessions are the pre-group and booster sessions from the published  
6  
7 CWD manual<sup>55</sup>. To ensure that the CWD intervention was distinct from IPT, we excluded the 2  
8  
9 sessions on social skills and emphasized pleasant activities that were individual rather than social.  
10  
11 Consistent with standard CWD, we focused on addressing depression rather than discussing grief  
12  
13 or perinatal loss. We expanded other CWD material (e.g., relaxation practice) to replace sessions  
14  
15 on social skills. In our studies, the 12 CWD sessions covered: an introduction to social learning  
16  
17 rationale of depression; learning to relax; relaxation in everyday situations; pleasant activities and  
18  
19 depression; formulating a pleasant activities plan; constructive thinking; planning for constructive  
20  
21 thinking; and maintaining gains (see published manual<sup>55</sup> and pilot trial<sup>31</sup> for additional details).  
22  
23  
24  
25

## 26 **Participants**

27  
28 Participants will be 274 women who are experiencing MDD in the context of perinatal loss  
29  
30 who (1) meet DSM-5<sup>56</sup> criteria for MDD; (2) have experienced a perinatal loss (including early  
31  
32 and late fetal death, death of a liveborn neonate within the first 28 days, and medically  
33  
34 recommended termination) within the last 1-12 months; (3) are 18 to 50 years old; (4) speak and  
35  
36 understand English well enough to understand questionnaires when they are read aloud; (5) can  
37  
38 provide the name and contact information of at least two locator persons; and (6) have access to a  
39  
40 telephone. Exclusion criteria are: (1) onset of *current* major depressive episode prior to news of  
41  
42 difficulties with the pregnancy or health risk to the infant (women with prior episodes are included);  
43  
44 (2) current or past diagnosis of bipolar disorder, schizophrenia or other psychotic disorder; (3)  
45  
46 primary diagnosis of current substance use disorder; (4) acute suicidal or homicidal risk; (5)  
47  
48 beginning or changing dose of antidepressant medication or psychotherapy in the previous 12  
49  
50 weeks); (6) any IPT or cognitive-behavioral treatment in the previous 12 weeks. Women in stable  
51  
52  
53  
54  
55  
56  
57  
58  
59  
60

1  
2  
3 concurrent psychotherapy who are included are asked to suspend this treatment during the active  
4 study treatment phase. PTSD is not an inclusion criterion. However, based on our pilot,<sup>31</sup> we  
5 anticipate that slightly more than half the sample will meet criteria for PTSD at study enrollment.  
6  
7

### 8 9 10 **Therapist training and supervision**

11  
12 We trained 8 study therapists (4 in IPT and 4 in CWD) who are MSWs or clinical or  
13 counseling psychologists. Therapists are recruited from their respective communities to moonlight  
14 as clinicians in this proposed study. Therapists are provided with the detailed treatment manuals.  
15  
16 Training for both conditions includes education and role plays. Therapists in both conditions will  
17 be monitored for adherence/competence throughout the study and retrained as needed.  
18  
19

20  
21 Supervision involves review of therapists' audiotaped sessions and a weekly one-hour  
22 small-group telephone meeting for feedback and case discussion. Treatment sessions are audio  
23 recorded using digital audio recorders or a HIPAA-compliant version of Zoom. Study therapists  
24 remotely upload the recordings to the study's secure research server, where the supervisors can  
25 remotely access them.  
26  
27

### 28 29 30 **Randomization**

31  
32 Women are randomly assigned to IPT or CWD in a 1:1 ratio. We stratify randomization  
33 on (1) whether women have been taking antidepressant medications or attending other  
34 psychotherapy (stability of dose is an inclusion criterion); and (2) type of perinatal loss  
35 (miscarriage, stillbirth, neonatal death). Randomization sequences were created by the study  
36  
37  
38  
39  
40  
41  
42  
43  
44  
45  
46  
47  
48  
49  
50  
51  
52  
53  
54  
55  
56  
57  
58  
59  
60

### 51 52 53 **Recruitment**

54  
55 Participants are recruited from counties in Southeast Michigan using a broad outreach  
56  
57  
58  
59  
60

1  
2  
3 Detroit, and a regional Medicaid system in study recruitment. Recruitment also includes flyers  
4 and referrals from: (1) local birthing centers, emergency departments, OBGYN offices, and  
5  
6  
7  
8 federally qualified health centers; (2) hotlines, support groups, family nurse partnerships; (3)  
9  
10  
11 funeral homes; (4) churches, daycare centers, other places where women and mothers congregate  
12  
13 (WIC offices, Medicaid offices, etc.); (5) bus ads; and (6) online venues. We began recruitment  
14  
15 on September 1, 2021 and plan to end on March 1, 2025.

### 16 17 **Research sites**

18  
19 We had planned to offer baseline assessments at women's homes or our offices, group  
20  
21 sessions in community locations convenient for participants (as we did in the pilot trial),<sup>31</sup> and to  
22  
23  
24 conduct follow-up assessments by telephone. However, due to the COVID-19 pandemic, we are  
25  
26 currently conducting all assessments and treatment sessions by Zoom, with an option to go back  
27  
28 to holding groups in person in the future.

### 29 30 31 **Retention**

32  
33 We employ techniques we have found helpful in achieving low attrition rates in previous  
34  
35 studies.<sup>31 57-59</sup> These include study staff's strong relationships with participants, efforts to value  
36  
37 and appreciate the women's participation in the study, and frequent personal contact. We are  
38  
39 flexible about follow-up appointment scheduling and train research staff to be culturally sensitive.  
40  
41 Follow-up assessments take place by Zoom or phone, with well-established safety procedures for  
42  
43 emergencies.<sup>57</sup> We maintain a list of two other people who know where the participant resides.  
44  
45  
46 We conduct treatment groups at different times and locations to make attendance easier. If a  
47  
48 woman misses a treatment appointment, the therapist calls her to check in and problem-solve  
49  
50 barriers to attendance. Finally, participant fees for follow-up assessments help facilitate retention.  
51  
52

### 53 54 **Assessments**

1  
2  
3 Assessments take place at baseline, mid-treatment (8 weeks), post-treatment (16 weeks),  
4 and follow-up (28 weeks; see Table 2). Assessments are conducted by research assistants (RAs)  
5 trained and certified in interviewer administered instruments and blind to treatment assignment.  
6 Interviewers and senior staff meet regularly to review assessment tapes, address questions, and  
7 monitor inter-rater reliability. Data quality is maintained through clerical and clinical checks after  
8 data are entered and through regular examination of distributions, missing data, and outliers.  
9

10  
11  
12 **Diagnosis/screening.** The Structured Clinical Interview for DSM-5 (SCID-5)<sup>60</sup> is used to  
13 establish study eligibility. During follow-up, the Longitudinal Interval Follow-up Examination  
14 (LIFE),<sup>61 62</sup> a standardized retrospective calendar-based interview, is used to assess MDD and  
15 PTSD recovery. The LIFE uses Psychiatric Status Ratings (PSRs) to categorize DSM-5 symptoms  
16 on a scale of 1 (asymptomatic) to 6 (incapacitated) for each week. A PSR of 5 or 6 indicates the  
17 participant meets full diagnostic criteria, 3 or 4 indicates subthreshold disorder, and 1 or 2 indicates  
18 the participant is not in episode. For survival analyses, recovery is defined as 8 consecutive weeks  
19 of a PSR of 1-2<sup>63</sup> at any time between baseline and the 28 week follow-up. Women who do not  
20 have at least 8 consecutive weeks of PSR of 1-2 during this time are considered “not recovered.”  
21 The LIFE is the gold-standard way of determining onset and offset of psychiatric disorder.<sup>63</sup> We  
22 also use the LIFE to track participation in psychotherapeutic and psychopharmacologic treatment  
23 at baseline and follow-up. We assess partner violence using the Women’s Experience with  
24 Battering screen.<sup>64</sup> Battered women (scores of 20+) are included in the study and provided with  
25 partner violence resources.  
26  
27  
28  
29  
30  
31  
32  
33  
34  
35  
36  
37  
38  
39  
40  
41  
42  
43  
44  
45  
46  
47  
48

49 **Depressive symptoms** are assessed using the Quick Inventory of Depressive Symptoms  
50 (QIDS), Self-Report version.<sup>65</sup>  
51

52 **PTSD symptoms** are assessed using the Life Events Checklist and PTSD Checklist for  
53  
54  
55  
56  
57  
58  
59  
60

1  
2  
3 DSM-5 (LEC-PCL).<sup>66-69</sup> We also assess whether PTSD symptoms are related to the perinatal loss.

4  
5 **Social support and social functioning.** We use the 12-item Multidimensional Scale for  
6 Perceived Social Support (MSPSS)<sup>70</sup> to assess overall social support. We use a validated  
7 adaptation of the Relationship Assessment Scale<sup>71</sup> to assess satisfaction with an important  
8 significant other (partner or other support person of the woman's choosing) relationship. We assess  
9 social functioning using the Short version of the Social Adjustment Scale – Self-Report (SAS-  
10 SR).<sup>72</sup> Because depression can affect parenting, we will analyze the SAS-SR total score as well as  
11 its parental functioning subscale.

12  
13  
14  
15  
16  
17  
18  
19  
20  
21 **Well-being** (including life satisfaction, purpose and meaning) is measured by using the 23-  
22 item Neuro-QoL scale for positive affect and well-being.<sup>73</sup>

23  
24  
25  
26 **Grief** symptoms are measured using the Perinatal Bereavement Grief Scale (PBGS).<sup>4 74</sup>  
27 Complicated grief is measured using the Inventory of Complicated Grief (ICG).<sup>75</sup> A few items on  
28 the ICG were reworded to refer to perinatal loss. Given that many women present with unwarranted  
29 beliefs about what caused the loss, we assess deservingness and guilt as grief outcomes using a 7-  
30 item scale about loss beliefs (the Loss Beliefs Scale). This scale includes items such as “I think  
31 what happened was my fault” and “The miscarriage, stillbirth, or baby's death was caused by  
32 something about me.” This perinatal loss specific scale was created after reviewing the literature  
33 on beliefs about deserved bad outcomes (e.g.,<sup>76-78</sup>).

34  
35  
36  
37  
38  
39  
40  
41  
42  
43  
44  
45 **Fear of subsequent pregnancies** is assessed by 7-point Likert items (from 1 = Strongly  
46 Disagree” to 7 = “Strongly Agree”): (1) “I am afraid to become pregnant again”; (2) “I look  
47 forward to becoming pregnant again”; (3) “I plan to become pregnant again”; (4) “I worry about  
48 what might happen if I get pregnant again,” (5) “I do not want to be pregnant again.”

49  
50  
51  
52  
53  
54 **Treatment acceptability** is measured using the Client Satisfaction Questionnaire-Revised

1  
2  
3 (CSQ-8-R).<sup>79</sup>  
4

5 **Treatment integrity.** We will use the IPT and CWD adherence and competence scales  
6 developed in the pilot trial<sup>31</sup> to rate fidelity using audio recordings. As in the pilot trial, raters will  
7 also assess the percent of time in each group session spent discussing the perinatal loss and  
8 discussing loss-related communication strategies.<sup>31</sup>  
9

### 14 **Analysis**

15  
16 Primary analyses will be intent-to-treat. We will examine dose-response effects in  
17 secondary analyses. Primary tests will be two-sided with  $p=0.05$ . Descriptive statistics will include  
18 effect sizes and measures of clinical significance.<sup>80</sup> Primary and secondary outcomes and all  
19 hypotheses are stated a priori, therefore 0.05 level of significance will be used. Per Kraemer,<sup>81</sup> we  
20 will not test for differences between conditions due to randomization as those differences are due  
21 to chance alone, rendering p-values meaningless. Covariates for analyses are specified a priori  
22 based on subject matter expertise. No interim analyses are planned.  
23  
24  
25  
26  
27  
28  
29  
30  
31  
32

33 **Attrition analysis and missing data.** We will compare characteristics of those who drop  
34 out by trial arm and compare those who complete the study with those who do not to assess  
35 generalizability of findings. For the primary outcome of time to MDD recovery, unobserved time  
36 to MDD resolution for the drop-outs will be treated as censored. For secondary outcomes,  
37 regression techniques below allow for missing at random (MAR) mechanism.<sup>82</sup> If patterns of  
38 missing data indicate potential not missing at random (NMAR) mechanisms, then models  
39 describing missing mechanisms will be considered (e.g., pattern-mixture models),<sup>83 84</sup> and  
40 sensitivity analyses will be employed.  
41  
42  
43  
44  
45  
46  
47  
48  
49  
50

51 **General approaches.** For survival analyses, the proportional hazard (PH) assumption will  
52 be evaluated. If it holds, then survival analyses will use Cox regression. If not, time-varying  
53  
54  
55  
56  
57  
58  
59



1  
2  
3 effects will be investigated, and the model will be modified to include an interaction of relevant  
4  
5 covariates with a function of time variable. Stratified models will also be considered.  
6  
7

8       Linear mixed effects (LME) models will be used to test differences between trial arms for  
9  
10 continuous outcomes. All participants with at least one completed post-baseline assessment will  
11  
12 be included. We expect these scores to follow normal distributions. However, generalized linear  
13  
14 mixed effects (GLME) modeling will be used if outcome is not normally distributed and cannot  
15  
16 be normalized using transformations.  
17  
18

19       **Aim 1.** (1) Using survival analysis, with initial QIDS score as a covariate, we will test the  
20  
21 hypothesis that IPT, relative to CWD, will result in reduced time to recovery from the major  
22  
23 depressive episode (primary). (2) Using LME or GLME with baseline QIDS score as a covariate,  
24  
25 we will test the hypothesis that IPT, relative to CWD, will result in reduced depressive symptoms  
26  
27 (QIDS scores) across post-baseline assessments. (3) Using LME or GLME with baseline PCL  
28  
29 score as a covariate, we will test the hypothesis that IPT, relative to CWD, will result in reduced  
30  
31 PTSD symptoms (PCL score) across post-baseline assessments. (4) Using survival analysis, with  
32  
33 initial PCL score as a covariate, we will test the hypothesis that IPT, relative to CWD, will result  
34  
35 in reduced time to recovery from PTSD.  
36  
37  
38  
39

40       **Aim 2.** Using baseline scores as covariates, we will separately test the hypotheses that  
41  
42 IPT for perinatal loss will result in increased social support, social role functioning, and well-  
43  
44 being, and decreased grief and fear of subsequent pregnancies, relative to CWD, using the LME  
45  
46 or GLME modeling described above. Specifically, controlling for baseline values, we will use  
47  
48 separate analyses to test the effects of IPT vs. CWD on MSPSS, Relationship Assessment Scale,  
49  
50 SAS-SR total, SAS-SR parenting subscale, Neuro-QoL, Perinatal Bereavement Grief Scale,  
51  
52 Inventory of Complicated Grief, Loss Belief Scale, and Fear of Subsequent Pregnancy scores. We  
53  
54  
55  
56  
57  
58  
59  
60

1  
2  
3 will also compare conditions on CSQ-8-R Treatment Acceptability.  
4

5 **Aim 3.** We will test the hypotheses that social support (MSPSS scores) and grief (PBGS  
6 scores) will mediate the effects of IPT on time to MDD recovery. To test for mediation, trial arm  
7 will be treated as the independent variable and each potential mediator (one at a time) will be tested  
8 for their effect on the outcome variable at weeks 8, 16, and 28, with the baseline value of that  
9 outcome treated as a covariate. We will use a bias corrected bootstrapping analytic strategy<sup>85 86</sup>  
10 based on 5000 bootstrap samples to estimate confidence intervals (CIs) around the indirect effect  
11 of study group on the outcome variable, through the mediator.  
12  
13  
14  
15  
16  
17  
18  
19  
20

21 **Moderators.** We will calculate differential effect estimates and test the interactions  
22 between several participant characteristics and the intervention effect in predicting time to  
23 recovery from MDD. Characteristics to be examined include race, ethnicity, having living children,  
24 type of perinatal loss, stable use of other antidepressant or psychosocial treatment at baseline,  
25 having PTSD at baseline, having a partner, number of past depressive episodes, and time since  
26 loss. Given our emphasis on meeting the needs of minority women, we will also evaluate whether  
27 mediation relationships or intervention effects on secondary outcomes differ by race.  
28  
29  
30  
31  
32  
33  
34  
35  
36

### 37 **Sample size**

38 **Recovery outcomes.** For the primary outcome of time to MDD recovery (censored at 28  
39 weeks), assuming 1:1 allocation, power 0.80, two-sided tests at  $p=0.05$ , and observed estimated  
40 hazard ratio=1.79, the required number of events is 94 (number of MDEs resolved). By week  
41 28, there were 17 events in the preliminary data (17 women had MDD resolved, 11 in the IPT  
42 condition, and 6 in the CWD condition) out of 45 participants, so the rate of events was .38. Thus  
43 to have 94 events, total  $N=246$  is required. Given that 90% of pilot trial participants completed at  
44 least one follow-up assessment,<sup>31</sup> we increased the sample size to 274. Given the observed hazard  
45  
46  
47  
48  
49  
50  
51  
52  
53  
54  
55  
56  
57  
58  
59  
60

1  
2  
3 ratio of 5.85 for PTSD in the pilot trial, power for PTSD recovery should be greater than 80%.  
4  
5 Tests of mediation in Aim 3 will have greater power than the primary outcome because of  
6  
7 reduction in error variance when controlling for the mediator.  
8  
9

10 Continuous (secondary) outcomes. Assuming an unadjusted  $d = .32$  and a correlation of  
11  
12 0.6 between follow-up measures and 0.3 with baseline (as observed in the preliminary data), the  
13  
14 adjusted effect size would be 0.40, and only  $n = 200$  participants would be needed before attrition.  
15  
16 If study attrition is higher, the study still has  $> 80\%$  power for secondary outcomes (Table 3).  
17  
18

### 19 **Ethics and Dissemination**

20  
21 The trial was approved by Michigan State University's Biomedical Institutional Review  
22  
23 Board (FWA 00004556). A three-member external Data and Safety Monitoring Board reviews  
24  
25 data and safety of study participants. Trial safety procedures are codified through checklists and  
26  
27 a written manual of operating procedures.  
28  
29

### 30 **Informed consent and confidentiality**

31  
32  
33 When potential participants contact the study, study RAs meet with them privately  
34  
35 (electronically or in person). RAs explain risks, benefits, and the voluntary nature of the study and  
36  
37 obtain participants' signed informed consent.  
38  
39

40 Confidentiality is protected by research staff trained to manage sensitive clinical issues.  
41  
42 Participants are informed about the limits of confidentiality concerning suicidal intent, homicidal  
43  
44 intent, and suspected child or elder abuse. Computer files are available only to authorized  
45  
46 personnel, with no names or obvious identifying information stored in data files. Confidentiality  
47  
48 of recordings of study assessments and treatment sessions is protected through: (1) use of  
49  
50 encrypted audio recorders and HIPAA-compliant videoconferencing; (2) labeling recordings with  
51  
52  
53  
54  
55  
56  
57  
58  
59  
60

1  
2  
3 study IDs rather than names; (3) storing recordings on a secured computer server designed to hold  
4  
5 and protect research data; and (4) limiting access to recordings.  
6

### 7 **Participant safety**

8  
9  
10 **Adverse events.** Participant safety is monitored during study assessments and during study  
11  
12 treatment sessions. Pre-specified adverse events are recorded and monitored using a structured  
13  
14 system created within REDCap with alerts for follow-up actions.<sup>57</sup>  
15

16  
17 **Suicide risk.** During assessments, participants who score 2 or above (any active suicide  
18  
19 ideation) on the QIDS suicide item are transferred via warm handoff to a national suicide hotline  
20  
21 contracted for this trial. The suicide hotline assesses suicidality and emergent treatment needs,  
22  
23 provides follow-up, and securely transmits a written disposition. This procedure has worked well  
24  
25 in previous trials.<sup>57</sup>  
26  
27

28  
29 **Clinical deterioration.** If a participant develops manic or psychotic symptoms, or if her  
30  
31 QIDS score increases by 5+ points from baseline, she is evaluated by an independent clinician to  
32  
33 see if she needs to be referred for other treatment and/or removed from the trial.  
34

35  
36 **Treatment nonresponse.** Women in either condition whose MDD has not remitted by the  
37  
38 end of the study (week 28) are referred for other treatment.  
39

### 40 **Dissemination policy and access to data**

41  
42 Dissemination activities will include academic papers, presentations to clinical communities,  
43  
44 community reports and talks with organizations through which we recruited, and offering to share  
45  
46 final study results with study participants. De-identified datasets will be available to qualified  
47  
48 investigators upon request.  
49  
50  
51  
52  
53  
54  
55  
56  
57  
58  
59  
60

1  
2  
3 **Author statement. Johnson:** Conceptualization (lead), funding acquisition (lead), investigation  
4 (lead), intervention development (equal), safety protocols (lead), writing – original draft  
5 preparation (lead), writing – review and editing (lead). **Zlotnick:** Conceptualization (supporting),  
6 funding acquisition (supporting), clinical supervision (equal), safety protocols (supporting),  
7 writing – review and editing (supporting). **Price:** Funding acquisition (supporting), intervention  
8 development (equal), clinical supervision (equal). **Sikorskii:** Conceptualization (supporting),  
9 funding acquisition (supporting), data curation, formal analysis. **Key:** Funding acquisition  
10 (supporting), recruitment strategy (supporting). **Lamphere, Taylor, Huff, and Cinader:**  
11 Recruitment strategies (lead), development of operating procedures (supporting), choice of  
12 measures (supporting).  
13  
14  
15  
16  
17  
18  
19  
20  
21  
22  
23  
24  
25

26 **Funding statement.** This work was supported by the Eunice Kennedy Shriver National Institute  
27 of Child Health and Human Development (NICHD) grant number (R01 HD100471). NICHD had  
28 no role in the design of the study and will have no role in the implementation of the study, analysis  
29 of the data, or writing of the manuscript.  
30  
31  
32  
33  
34

35 **Competing interests statement.** The authors have no competing interests.  
36  
37  
38  
39  
40  
41  
42  
43  
44  
45  
46  
47  
48  
49  
50  
51  
52  
53  
54  
55  
56  
57  
58  
59  
60

Table 1

Outline of IPT for major depressive disorder following perinatal loss

| Session name                                    | Session activities                                                                                                                                                                                                                                                                                                                                                                                                                                                            |
|-------------------------------------------------|-------------------------------------------------------------------------------------------------------------------------------------------------------------------------------------------------------------------------------------------------------------------------------------------------------------------------------------------------------------------------------------------------------------------------------------------------------------------------------|
| <b>1: Emotions of grief</b>                     | Each woman tells her perinatal loss story and: expresses her feelings at the time of her loss, feels and expresses her current feelings about her loss, elicits support from and supports the other group members.                                                                                                                                                                                                                                                            |
|                                                 | Each woman is guided to: identify current supportive people, select one person to ask for grief support, role-play how to ask for support.                                                                                                                                                                                                                                                                                                                                    |
| <b>2: Understanding what happened</b>           | Each woman: explores her understanding of what happened to her pregnancy/baby, explores her thoughts/feelings about fault or blame, explores what the loss means to her, begins to explore who she has talked to about the loss and how she talks to them about her needs, identifies who she will invite to Session 3, role-plays how to communicate this invitation.                                                                                                        |
|                                                 | The therapist: helps each woman unpack and examine whether there was anything she could have done to change the outcome, with support from the group, guides the women to seek information from their OBGYN providers about what does and does not contribute to perinatal loss, guides women to identify additional questions for their providers, helps each woman explore how she makes sense of her loss.                                                                 |
| <b>3: Grieving with others</b>                  | Each woman is encouraged to invite a support person to the group. The therapist provides psychoeducation about: depression, grieving styles, ways to manage grieving differences, how IPT helps women recover and how partner/family/friend support can help women recover.                                                                                                                                                                                                   |
|                                                 | Next the therapist guides each woman and her support person to: complete a written communication exercise about both partners' loss-related emotional needs, discuss their written answers privately for 20 minutes, discuss as a group what they learned from each other about support, discuss how each pair will manage communication with others in their social network, develop communication homework to improve each pair's support of each other regarding the loss. |
| <b>4: Holding the memory and moving forward</b> | Each woman discusses how she: holds the memory/meaning of her loss experience, can re-engage in life roles, seeks support and communication with key people, reflects on her grief process and her recovery from depression.                                                                                                                                                                                                                                                  |
|                                                 | The therapist guides the group by: reminding them that new members are added next week and discussing ways to welcome them, eliciting and role-modeling how to offer well-wishes to and from women completing their group treatment in this session.                                                                                                                                                                                                                          |

Table 2

## Schedule of Assessments

| Measure                                         | Baseline | Week 8 | Week 16 | Week 28 |
|-------------------------------------------------|----------|--------|---------|---------|
| <b>Diagnosis and safety</b>                     |          |        |         |         |
| SCID-5                                          | X        |        |         |         |
| Women's Experience with Battering screener      | X        |        |         |         |
| Longitudinal Interval Follow-up Examination     | X        | X      | X       | X       |
| <b>Psychiatric symptoms</b>                     |          |        |         |         |
| Quick Inventory of Depressive Symptoms          | X        | X      | X       | X       |
| Life Events Checklist and PTSD Checklist        | X        | X      | X       | X       |
| <b>Hypothesized mediators</b>                   |          |        |         |         |
| Multidim. Scale of Perceived Social Support     | X        | X      | X       | X       |
| Relationship Assessment Scale                   | X        | X      | X       | X       |
| Social Adjustment Scale total score             | X        | X      | X       | X       |
| Social Adjustment Scale parental functioning    | X        | X      | X       | X       |
| <b>Other outcomes (grief, well-being, fear)</b> |          |        |         |         |
| NIH Neuro-Quality of Life scale                 | X        | X      | X       | X       |
| Perinatal Bereavement Grief Scale               | X        | X      | X       | X       |
| Inventory of Complicated Grief                  | X        | X      | X       | X       |
| Loss Beliefs Scale                              | X        | X      | X       | X       |
| Fear of subsequent pregnancies                  | X        | X      | X       | X       |
| <b>Treatment acceptability of IPT and CWD</b>   |          |        |         |         |
| Client Satisfaction Scale – Revised             |          |        | X       |         |

Table 3

Power for n = 274 for secondary outcomes

|               | <i>d</i> = .29 | <i>d</i> = .32 | <i>d</i> = .35 |
|---------------|----------------|----------------|----------------|
| 10% attrition | .81            | <b>.88</b>     | .93            |
| 15% attrition | .74            | .83            | .88            |
| 20% attrition | .72            | .80            | .86            |
| 25% attrition | .69            | .78            | .84            |



## References

1. Armstrong DS. Emotional Distress and Prenatal Attachment in Pregnancy After Perinatal Loss. *Journal of Nursing Scholarship* 2002;34(4):339-45.
2. AmericanPregnancy. 2008 [Available from: [www.americanpregnancy.org/main/statistics.html](http://www.americanpregnancy.org/main/statistics.html) accessed June 2008.
3. Gavin N, Gaynes, BN, Lohr, KN, Meltzer-Brody, S, Gartlehner, G, & Swinson, T. Perinatal depression: A systematic review of prevalence and incidence. *Obstet Gynecol* 2005;106(5 Pt 1):1071-83.
4. Klier CM, Geller PA, Ritsher JB. Affective disorders in the aftermath of miscarriage: A comprehensive review. *Archives of Women's Mental Health* 2002;5(4):129-49.
5. Neugebauer R, Kline J, Shrout P, et al. Major depressive disorder in the 6 months after miscarriage. *JAMA: Journal of the American Medical Association* 1997;277(5):383-88.
6. Lee DTS, Wong CK, Cheung LP, et al. Psychiatric morbidity following miscarriage: A prevalence study of Chinese women in Hong Kong. *Journal of Affective Disorders* 1997;43(1):63-68.
7. Neugebauer R. Depressive symptoms at two months after miscarriage: Interpreting study findings from an epidemiological versus clinical perspective. *Depression and Anxiety Special issue: Anxiety disorders in women* 2003;17(3):152-61.
8. Neugebauer R, Kline J, O'Connor P, et al. Determinants of depressive symptoms in the early weeks after miscarriage. *American Journal of Public Health* 1992a;82(10):1332-39.
9. Neugebauer R, Kline J, O'Conner P, et al. Depressive symptoms in women in the six months after miscarriage. *American Journal of Obstetrics and Gynecology* 1992 b;166(1 Pt 1):104-09.

10. Beutel M, Deckardt, R., von Rad, M., Weiner, H. Grief and depression after miscarriage: Their separation, antecedent, and course. *Psychosomatic Medicine* 1995;57:517-26.
11. Thapar A, Thapar A. Psychological sequelae of miscarriage: a controlled study using the general health questionnaire and the hospital anxiety and depression scale. *British Journal of General Practice* 1992;42:94-96.
12. Stirtzinger RM, Robinson GE, Stewart DE, et al. Parameters of grieving in spontaneous abortion. *International Journal of Psychiatry in Medicine* 1999;29(2):235-49.
13. Gold KJ, Leon, I., Boggs, M. E., Sen, A. Depression and Posttraumatic Stress Symptoms After Perinatal Loss in a Population-Based Sample. *Journal of Women's Health* 2016;25(3):263-69.
14. Boyle FM, Vance JC, Najman JM, et al. The mental health impact of stillbirth, neonatal death or sids: Prevalence and patterns of distress among mothers. *Social Science & Medicine* 1996;43(8):1273-82.
15. Vance JC, Boyle FM, Najman JM, et al. Gender differences in parental psychological distress following perinatal death or sudden infant death syndrome. *British Journal of Psychiatry* 1995;167(6):806-11.
16. Clarke M, Williams AJ. Depression in women after perinatal death. *Lancet* 1979;1:916-17.
17. Carrera L, Diez-Domingo J, Montanana V, et al. Depression in women suffering perinatal loss. *International Journal of Gynecology & Obstetrics* 1998;62:149-53.
18. Janssen HJEM, Cuisinier MCJ, Hoogduin KAL, et al. Controlled prospective study on the mental health of women following pregnancy loss. *American Journal of Psychiatry* 1996;153(2):226-30.

- 1  
2  
3 19. Kulathilaka S, Hanwella, R., de Silva, V. A. Depressive disorder and grief following  
4  
5 spontaneous abortion. *BMC Psychiatry* 2016;16:100.  
6
- 7  
8 20. Wall-Wieler E, Roos, L. L., Bolton, J. Duration of maternal mental health-related outcomes  
9  
10 after an infants death: A retrospective matched cohort study using linkable administrative  
11  
12 data. *Depression and Anxiety* 2018;35:305-12.  
13
- 14  
15 21. Gravensteen IK, Helgadóttir, L. B., Jacobsen, E, Radestad, I., Sandset, P. M., Ekeberg, O.  
16  
17 Women's experiences in relation to stillbirth and risk factors for long-term post-traumatic  
18  
19 stress symptoms: a retrospective study. *BMJ Open* 2013;3:e003323.  
20
- 21  
22 22. Gissler M, Hemminki E, Lonnqvist J. Suicides after pregnancy in Finland, 1987-1994: Register  
23  
24 linkage study. *British Medical Journal* 1996;313(7070):1431-34.  
25
- 26  
27 23. Schiff MA, Grossman DC. Adverse perinatal outcomes and risk for postpartum suicide attempt  
28  
29 in Washington State, 1987-2001. *Pediatrics* 2006;118(3):e669-e75.  
30
- 31  
32 24. Engelhard I, van den Hout, MA, Arntz, A. Posttraumatic stress disorder after pregnancy loss.  
33  
34 *General Hospital Psychiatry* 2001;23(2):62-66.  
35
- 36  
37 25. Nikcevic AV. Development and evaluation of a miscarriage follow-up clinic. *Journal of*  
38  
39 *Reproductive and Infant Psychology* 2003;21(3):207-17.  
40
- 41  
42 26. DiMarco M, Menke, EM, McNamara, T. Evaluating a support group for perinatal loss. *The*  
43  
44 *American Journal of Maternal/Child Nursing* 2001;26(3):135-40.  
45
- 46  
47 27. McCreight B. Perinatal loss: A qualitative study in Northern Ireland. *Journal of Death and*  
48  
49 *Dying* 2008;57(1):1-19.  
50
- 51  
52 28. Conway K. Miscarriage experience and the role of support systems: A pilot study. *British*  
53  
54 *Journal of Medical Psychology* 1995;68(3):259-67.  
55  
56  
57  
58  
59  
60

- 1  
2  
3 29. Brier N. Understanding and managing the emotional reactions to miscarriage. *Obstet Gynecol*  
4  
5 1999;93:151-55.  
6  
7  
8 30. Cordle CJ, Prettyman RJ. A 2-year follow-up of women who have experienced early  
9  
10 miscarriage. *Journal of Reproductive and Infant Psychology* 1994;12(1, Jan-Mar )  
11  
12  
13 31. Johnson J, Price AB, Kao, JC, Fernandes, K. Stout, RL, Gobin, R, Zlotnick, C. Interpersonal  
14  
15 psychotherapy (IPT) for major dpression following perinatal loss: A pilot randomized  
16  
17 controlled trial. *Archives of Women's Mental Health* 2016;19(5):845-59.  
18  
19  
20 32. Crockett K, Zlotnick C, Davis M, et al. A depression preventive intervention for rural low-  
21  
22 income African-American pregnant women at risk for postpartum depression. *Arch*  
23  
24 *Womens Ment Health* 2008;11(5-6):319-25. doi: 10.1007/s00737-008-0036-3 [published  
25  
26 Online First: 2008/11/05]  
27  
28  
29 33. O'Hara MW, Stuart, S., Gorman, L.L., Wenzel, A. Efficacy of Interpersonal Psychotherapy for  
30  
31 Postpartum Depression. *Archives of General Psychiatry* 2000;57(11):1039-45.  
32  
33  
34 34. Ramezani S, Khosravi, A., Motaghi, Z., Hamidzadeh, A., Mousavi, S. A. The effect of  
35  
36 cognitive-behavioural and solution-focused counselling on prevention of postpartum  
37  
38 depression in nulliparous pregnant women. *Journal of Reproductive and Infant Psychology*  
39  
40 2017;35(2):172-82.  
41  
42  
43 35. Milgrom JD, B. G., Gemmill, Aa.a W., Holt, C., Christopher, J. Internet cognitive behavioral  
44  
45 therapy for women with postnatal depression: A randomized controlled trial of  
46  
47 MumMoodBooster. *Journal of Medical Internet Research* 2016;18(3)  
48  
49  
50 36. NOrsker F, Espenhain, L, Rogvi, S, Morgen, CS, Andersen, PK, Andersen, A. Socioeconomic  
51  
52 position and the risk of spontaneous abortion: a study within the Danish National Birth  
53  
54 Cohort. *BMJ Open* 2012;2::e001077.  
55  
56  
57  
58  
59  
60

- 1  
2  
3 37. Seaton S, Field, DJ, Draper, ES, Manktelow, BN, Smith, GCS, Springett, A, Smith, LK.  
4  
5 Socioeconomic inequalities in the rate of stillbirths by cause: a population-based study.  
6  
7 *BMJ Open* 2012;2:e001100.  
8  
9  
10 38. Singh G, Daus, GP, Allender, M, Ramey, CT, Martin, EK, Perry, C, De Los Reyes, AA,  
11  
12 Vedamuthu, IP. Social Determinants of Health in the United States: Addressing Major  
13  
14 Health Inequality Trends for the Nation, 1935-2016. *International Journal of MCH and*  
15  
16 *AIDS* 2017;6(2):139-64.  
17  
18  
19 39. Hobfoll SE, Ritter C, Lavin J, et al. Depression prevalence and incidence among inner-city  
20  
21 pregnant and postpartum women. *Journal of Consulting and Clinical Psychology*  
22  
23 1995;63(3):445-53.  
24  
25  
26 40. Scholle SH, Haskett RF, Hanusa BH, et al. Addressing depression in obstetrics/gynecology  
27  
28 practice. *General Hospital Psychiatry* 2003;25(2):83-90.  
29  
30  
31 41. Davilla M, McFall, S.L., & Cheng, D. Acculturation and depressive symptoms among pregnant  
32  
33 and postpartum Latinas. *Maternal and Child Health Journal*, 2008;13:318-25.  
34  
35  
36 42. Chaudron LH, Kitzman, H.J., Peifer, K.L., Morrow, S. Perez, L.M., & Newman, M.C.  
37  
38 Prevalence of maternal depressive symptoms in low-income Hispanic women. *Journal of*  
39  
40 *Clinical psychiatry* 2005;66(4):418-23.  
41  
42  
43 43. Boury J, Larkin K, Krummel D. Factors related to postpartum depressive symptoms in low-  
44  
45 income women. *Women and Health* 2004;39(3):19-34.  
46  
47  
48 44. Price S, Proctor E. A rural perspective on perinatal depression: Prevalence, correlates, and  
49  
50 implications for help-seeking among low-income women. *The Journal or Rural Health*  
51  
52 2009;25(2):158-66.  
53  
54  
55  
56  
57  
58  
59  
60

- 1  
2  
3  
4  
5  
6  
7  
8  
9  
10  
11  
12  
13  
14  
15  
16  
17  
18  
19  
20  
21  
22  
23  
24  
25  
26  
27  
28  
29  
30  
31  
32  
33  
34  
35  
36  
37  
38  
39  
40  
41  
42  
43  
44  
45  
46  
47  
48  
49  
50  
51  
52  
53  
54  
55  
56  
57  
58  
59  
60
45. Hobfoll SE, Ritter C, Lavin J, et al. Depression prevalence and incidence among inner-city pregnant and postpartum women. *Journal of Consulting and Clinical Psychology* 1995;63(3):445-53.
46. Morris-Rush JK, Freda, M.C., & Bernstein, P.S. Screening for postpartum depression in an inner-city population. *American Journal of Obstetrics and Gynecology* 2003;188(5):1217-19.
47. Evans J, Heron J, H. F, et al. Cohort study of depressed mood during pregnancy and after childbirth. *British Medical Journal* 2001;323:257-60.
48. Mukherjee S, Edwards, DRV, Baird, DD, Savitz, DA, Hartmann, KE. Risk of Miscarriage Among Black Women and White Women in a US Prospective Cohort Study. *Am J epidemiol* 2013;177(11):1271-78.
49. Willinger M, Ko, C, Reddy, UM. Racial disparities in stillbirth risk across gestation in the United States. *Am J Obstet Gynecol* 2009;201(5):469.e1–69.e8.
50. US\_Department\_of\_Health\_and\_Human\_Services. Infant Mortality and African Americans 2017 [Available from: <https://minorityhealth.hhs.gov/omh/browse.aspx?lvl=4&lvlid=23> accessed 12-10-2018 2018.
51. Community\_Based\_Organization\_Partners. Community Based Organization Partners - Community Ethics Review Board (CBOP-CERB) 2021 [Available from: <https://www.hfrec.org/cerb/> accessed 9-17-21 2021.
52. Johnson JE. Wirksamkeit von gruppenbehandlungen bei majorer depression (Efficacy of group treatments for major depressive disorder). *Gruppenpsychotherapie und Gruppendynamik*. 2009;45:181-207.

- 1  
2  
3 53. Cuijpers P. A psychoeducational approach to the treatment of depression: A meta-analysis of  
4  
5 Lewinsohn's "Coping with Depression" course. *Behavior Therapy* 1998;29:521-33.  
6  
7  
8 54. Gilbert K, & Smart, LS. Coping with infant or fetal loss: The couple's healing process. . New  
9  
10 York: Bruner/Mazel 1992.  
11  
12 55. Lewinsohn P, Antonuccio, DO, Breckenridge, JS, & Teri, L. The "Coping With Depression"  
13  
14 course. Eugene, OR: Castalia 1984.  
15  
16  
17 56. American\_Psychiatric\_Association. Diagnostic and statistical manual of mental disorders (5th  
18  
19 ed.). Washington DC: American Psychiatric Association 2013.  
20  
21  
22 57. Johnson JE, Jones, R., Miller, T., Miller, I., Stanley, B., Brown, G., Arias, SA, Cerbo, L.,  
23  
24 Rexroth, J., Fitting, J., Russell, D., Kubiak, S., Stein, M., Matkovic, C., YEn, S., Gaudiano,  
25  
26 B., Weinstock, LM. Study protocol: A randomized controlled trial of suicide risk reduction  
27  
28 in the year following jail release (the SPIRIT Trial). *Contemporary Clinical Trials*  
29  
30 2020;94:106003.  
31  
32  
33 58. Johnson, JE, Zlotnick, C. Pilot study of treatment for major depression among women prisoners  
34  
35 with substance use disorder. *Journal of Psychiatric Research* 2012;46(9):1174-83.  
36  
37  
38 59. Zlotnick CM, Ivan W., Pearlstein, T, Howard, M, Sweeney, PA. Preventive intervention for  
39  
40 pregnant women on public assistance at risk for postpartum depression. *Am J Psychiatry*  
41  
42 2006;163(8):1443-45.  
43  
44  
45 60. First M, Williams, JBW, Karg, RS, Spitzer, RL. Structured Clinical Interview for DSM-5.  
46  
47 Arlington, VA: American Psychiatric Association 2015.  
48  
49 61. Keller M, Lavori, PW, Friedman, B, Nielson, E, Endicott, J, McDonald-Scott, P, & Andreasen,  
50  
51 NC. The Longitudinal Interval Follow-up Evaluation: A comprehensive method for  
52  
53  
54  
55  
56  
57  
58  
59  
60

- 1  
2  
3 assessing outcome in prospective longitudinal studies. *Archives of General Psychiatry*  
4  
5 1987a;44:540-48.  
6  
7  
8 62. Warshaw M, Keller, MB, & Stout, R. Reliability and validity of the longitudinal interval  
9  
10 follow-up evaluation for assessing outcome of anxiety disorders. *Journal of Psychiatric*  
11  
12 *Research* 1994;28:531-45.  
13  
14  
15 63. Keller M. Past, present, and future directions for defining optimal treatment outcome in  
16  
17 depression: Remission and beyond. *JAMA* 2003;289(3152-3160)  
18  
19  
20 64. Smith P, Earp, JA, Devellis, R. Measuring battering: Development of the Women's Experience  
21  
22 with Battering (WEB) scale. *Women's Health: Research on gender, behavior, and policy*  
23  
24 1995;1(4):273-88.  
25  
26  
27 65. Rush A, Trivedi, MH, Ibrahim, HM, Carmody, TJ, Arnow, B, Klein, DN, Markowitz, JC,  
28  
29 Ninan, PT, Kornstein, S, Manber, R, Thase, ME, Kocsis, JH, Keller, MB. The 16-item  
30  
31 quick inventory of depressive symptomatology (QIDS), clinician rating (QIDS-C), and  
32  
33 self-report (QIDS-SR): A psychometric evaluation in patients with chronic major  
34  
35 depression. *Biological Psychiatry* 2003;54(5):573-83.  
36  
37  
38 66. Weathers F, Litz, BT, Keane, TM, Palmieri, PA, Marx, BP, Schnurr, PP. The PTSD  
39  
40 Checklist for DSM-5 (PCL-5). : National Center for PTSD; 2013 [Available from:  
41  
42 [www.ptsd.va.gov](http://www.ptsd.va.gov).  
43  
44  
45 67. Blevins C, Weathers, FW, Davis, MT, Witte, TK, & Domino, JL. The Posttraumatic Stress  
46  
47 Disorder Checklist for DSM-5 (PCL-5): Development and initial psychometric evaluation.  
48  
49 *Journal of Traumatic Stress*, 2015;28:489-98.  
50  
51  
52 68. Bovin M, Marx, BP, Weathers, FW, Gallagher, MW, Rodriguez, P, Schnurr, PP, and Keane,  
53  
54 TM. Psychometric properties of the PTSD Checklist for Diagnostic and Statistical Manual  
55  
56  
57  
58  
59



- of Mental Disorders-Fifth Edition (PCL-5) in Veterans. . *Psychological Assessment*, 2015;28:1379-91. .
69. Wortmann J, Jordan, AH, Weathers, FW, Resick, PA, Dondanville, KA, Hall-Clark, B., Foa, EB, Youhg-McCaughan, S., Yarvis, J, Hembree, EA, Mintz, J, Peterson, AL, Litz, BT. Psychometric analysis of the PTSD Checklist-5 (PCL-5) among treatment-seeking military service members. . *Psychological Assessment*, 2015;28:1392-403.
70. Dahlem N, Zimet, GW, Walker RR. The Multidimensional Scale of Perceived Support: A confirmation study. *Journal of Clinical Psychology* 1991;47(6):756-61.
71. Renshaw K, McKnight, P, Caska, CM, Blais, RK. The utility of the Relationship Assessment Scale in multiple types of relationships. *Journal of social and Personal Relationships* 2011;28(4):435-47.
72. Gameroff M, Wickramaratne, P., Weissman, M.M. Testing the Short and Screener versions of the Social Adjustment Scale –Self-report (SAS-SR). *Int J Methods Psychiatr Res* 2012;21(1):52-65.
73. Salsman J, Victorson, D, Choi, SW, Peterman, AH, Heinemann, AW, Nowinski, C, Cella, D. Development and validation of the positive affect and well-being scale for the neurology quality of life (Neuro-QOL) measurement system. *Qual Life Res* 2013;22(9):2569-80.
74. Ritsher J, & Neugebauer, R. Perinatal Bereavement Grief Scale: Distinguishing grief from depression following a miscarriage. *Assessment* 2002;9:31-40.
75. Prigerson H, Maciejewski, PK, & Reynolds, CF. Inventory of Complicated Grief: A scale to measure maladaptive symptoms of loss. *Psychiatry Research* 1995;59(1-2):65-79.
76. Callan M, Kay, AC, Dawtry, RJ. Making Sense of Misfortune: Deservingness, Self-Esteem, and Patterns of Self-Defeat. *J Pers Soc Psychol* 2014;107(1):142-62.

- 1  
2  
3 77. Lucas T, Alexander, S., Firestone, I. Belief in a just world, social influence and illness  
4 attributions: Evidence of a just world boomerang effect. *Journal of Health Psychology*  
5 2009;14(2):258-66.  
6  
7  
8  
9  
10 78. Glinder JG, and Compas, B. E. Self-blame attributions in women with newly diagnosed breast  
11 cancer: A prospective study of psychological adjustment. *Health Psychology*  
12 1999;18(5):475-81.  
13  
14  
15  
16 79. Attkisson, CC, Zwick, R. The Client Satisfaction Questionnaire: Psychometric properties and  
17 correlations with service utilization and psychotherapy outcome. *Evaluation and Program*  
18 *Planning* 1982;5:233-237.  
19  
20  
21  
22  
23 80. Citrome L. Compelling or irrelevant? Using number needed to treat can help decide. *Acta*  
24 *Psychiatrica Scandinavica* 2008;117(6):412-19.  
25  
26  
27  
28 81. Kraemer H. A source of false findings in published research studies: Adjusting for covariates.  
29 *JAMA Psychiatry* 2015;72:961-62.  
30  
31  
32  
33 82. Little R, Rubin M. Statistical Analysis with Missing Data. New York: Wiley and Sons 1987.  
34  
35 83. Hogan JW, Roy J, Korkontzelou C. Handling drop-out in longitudinal studies. *Statistics in*  
36 *Medicine* 2004;23(9):1455-97.  
37  
38  
39  
40 84. Shen C, Weissfeld L. Application of pattern-mixture models to outcomes that are potentially  
41 missing not at random using pseudo maximum likelihood estimation. *Biostatistics*  
42 2005;6(2):333-47.  
43  
44  
45  
46 85. Preacher KJ SJ. Advantages of Monte Carlo confidence intervals for indirect effects.  
47 *Communication Methods and Measures* 2012;6:77-98.  
48  
49  
50  
51 86. Biesanz JC FC, Savalei V. Assessing mediational models: Testing and interval estimation for  
52 indirect effects. *Multivariate Behavioral Research* 2010;45:661-701.  
53  
54  
55  
56  
57  
58  
59  
60

# CONSENT FOR PARTICIPATION IN A RESEARCH PROJECT

Michigan State University

## Healing after Perinatal Loss

### FUNDING

This study is paid for by a grant from the National Institute of Child Health and Human Development.

### THE PROJECT

You are invited to participate in a research project. The goal of the research project is to find ways to help women cope after perinatal loss. You have been invited to participate because you have experienced a recent perinatal loss (miscarriage, stillbirth, or early death of an infant). Participation in the study will last up to 8 months.

To help you decide if you want to be part of this research study, we will tell you about the risks and benefits. This consent form gives you information about the research study. A member of the research team will also discuss this research. This will include the goal of the research and the questions you will be asked. It also tells about the treatment you may receive, any risks, possible benefits, and other possible treatments. Once you understand, you will be asked if you wish to participate. If you do, you will be asked to sign this form.

### WHAT WILL BE DONE

If you decide to participate, here's what will happen:

- 1. Initial interview.** A member of the study team will ask you questions about your life. This includes questions about your loss, your mood and stress levels, your relationships, and about stressful events which you may have experienced. We will also ask you for your contact information and for the contact information of people who can help us find you and who we can reach out to in case of emergency. This meeting will take about 90 minutes. We will use results from this meeting to decide if this study is a good match for you. If it doesn't seem to be a good match for your needs, this will be your last interview. We will give you a list of resources related to perinatal loss.
- 2. Random assignment.** If you are eligible for the study, you will be randomly assigned to one of two study programs. You have ½ chance of being assigned to each program. The words "random assignment" mean that we will use a method similar to flipping a coin to find out which program you will be in.
- 3. Study programs.** Both study programs involve 2 individual (60 minute) and 12 group (90 minute) counseling sessions. In either condition, you will meet once individually with a counselor, then you will meet weekly for 12 weeks with a group of other women who also recently had a perinatal loss. Finally, about a month after the group ends, you will meet individually again with the counselor.
  - (a) In the CWD program,** we will focus on ways to improve your mood and reduce stress.
  - (b) In the IPT program,** we will talk about perinatal loss and how to get support you need.
- 4. Follow-up interviews.** Everyone in the study will also be interviewed over the phone 3 times: about 8 weeks from now, after your program is over (about 16 weeks from now), and then 3 months after that (about 28 weeks from now). These interviews will last about an hour each. You will be given a \$60 gift card for your participation in each of these interviews.

- 1  
2  
3  
4  
5  
6  
7
5. **Audio recording.** During the study, we will audio record meetings with the counselor and parts of the interviews with study staff. We do this so we can supervise our research staff. We record the groups, but you can ask us not to audio record an individual meeting or interview and still participate in the study. You can also ask that a recording of an individual meeting be deleted. Audio recorders are passcode protected and encrypted and Zoom is HIPAA compliant, to protect your confidentiality.

## 8 **BENEFITS**

9  
10  
11  
12  
13

You may or may not benefit from being part of this study. For those who are enrolled in the study, you may learn better ways to manage your mood and adjust to your loss.

## 14 **RISKS OR DISCOMFORTS**

15  
16  
17  
18  
19  
20  
21  
22  
23  
24  
25  
26

There are some risks associated with the study. The questionnaires and interviews ask about sensitive personal issues that may be uncomfortable to talk about. You will be able to skip or not answer any questions that bother you. All the questions will be asked by research staff who are trained to deal sensitively with these issues. You may experience some discomfort when asked questions about your personal life, your loss, and/or problems you may have experienced. You will be referred to someone who can help you if you feel very uncomfortable. You may also become uncomfortable due to the length of the interview process. If you attend groups over Zoom, we will ask that other adults not be present, but there is always a possibility that someone could pass by and overhear the group conversation.

27  
28  
29  
30  
31  
32

You may also feel uncomfortable discussing personal issues in a group setting. If you feel this way during group, please tell the group leader. We strongly encourage confidentiality in the research groups. However, it is possible that someone may reveal information shared in the group. If this occurs, that person will be asked not to come back to the group.

## 33 **CONFIDENTIALITY**

34  
35  
36  
37  
38  
39  
40  
41  
42

We are committed to protecting your privacy. We have received a Certificate of Confidentiality from the National Institute of Child Health and Human Development (NICHD). This will protect the researchers from being forced, even by court order, to provide information about you. NICHD may see your research information in an audit. Also, the university research supervisors (from the MSU Human Research Protection Program) may see this information in an audit. If this happens, they will also keep the information confidential.

43  
44  
45  
46  
47  
48  
49  
50  
51  
52  
53  
54

Our Certificate of Confidentiality states that the information we collect about you can only be used for research and no other purpose. However, according to the Certificate of Confidentiality, confidentiality can be broken without your consent if harm to you, harm to others, or child abuse becomes a concern. If you are in serious current danger of hurting yourself, we may need to tell others to help you stay safe. If you are in serious danger of hurting someone else, we may need to tell that person and/or the appropriate police departments. Also, if we hear that someone has abused or neglected a child or elderly person, we have to let the appropriate state agencies know. If you attend groups over Zoom, we will ask that other adults not be present, but there is always a possibility that someone could pass by and overhear the group conversation.

55  
56  
57  
58  
59  
60

Information you tell us that is not listed above will be kept confidential. You will not be personally identified in any reports or publications that may come from this study. Your information will be labeled using a study ID number. Information about you will be protected in locked filing cabinets in locked university research offices and on secure computers. Only research staff who need the information will have access to it.

The permission you give us to use your information will not expire. The study data may be kept permanently. While the study is going on, you will not be allowed to see this information about you. You may have this information when the study is over.

Anonymous research information from this study may be shared with other researchers. In this anonymous information, all personal information about participants (like names, addresses, phone numbers) is removed and replaced with a code number. Sharing anonymous data can help researchers learn how to solve health problems for adults and children around the world more quickly than before.

A description of this clinical trial will be available on <http://www.ClinicalTrials.gov>, as required by U.S. law. This website will not include information that can identify you. At most, the website will include a summary of the results. You can search this website at any time.

### **DECISION TO PARTICIPATE AND RIGHT TO QUIT AT ANY TIME**

You are free to decide whether or not to participate in this study. You are also free to quit the study at any time by telling the researchers in person or in writing. Research information collected up to the time that you quit will remain as part of the study data.

### **POSSIBLE ALTERNATIVE PROCEDURES**

The first 12 weeks of the research program, we will ask you to temporarily take a break from other counseling you may be receiving. If you do not agree to do this, you will not be enrolled in the study. After you have completed the 12 weeks of the research program, you are free to receive other treatments or services.

### **QUESTIONS**

Please ask any questions you may have. Is there anything about this research that you do not understand?

### **WHO TO CALL**

If you ever have more questions about this project or want to report a research-related injury, please contact us. You may call Dr. Jennifer Johnson of Michigan State University at 810-600-5669. You may also email us at [Heal@msu.edu](mailto:Heal@msu.edu) or use regular mail to reach us at: 200 East 1st St, Room 366, Flint, MI 48502. If you have questions or concerns about your role and rights as a research participant, would like to obtain information or offer input, or would like to register a complaint about this study, you may contact the Michigan State University's Human Research Protection Program at 517-355-2180, Fax 517432-4503, or email [irb@msu.edu](mailto:irb@msu.edu) or regular mail at 4000 Collins Rd, Suite 136, Lansing, MI 48910. If you like, your comments can be anonymous.

### **AUTHORIZATION: BY SIGNING BELOW, YOU AGREE TO PARTICIPATE IN THE STUDY**

I will participate in this study. I understand what the research is about and what will happen. I also understand any possible dangers and inconveniences. I have received a copy of this consent form.

\_\_\_\_\_  
First Name (please print)

\_\_\_\_\_  
Middle Name

\_\_\_\_\_  
Last Name

\_\_\_\_\_  
Date

\_\_\_\_\_  
Signature

1  
2  
3  
4  
5  
6  
7  
8  
9  
10  
11  
12  
13  
14  
15  
16  
17  
18  
19  
20  
21  
22  
23  
24  
25  
26  
27  
28  
29  
30  
31  
32  
33  
34  
35  
36  
37  
38  
39  
40  
41  
42  
43  
44  
45  
46  
47  
48  
49  
50  
51  
52  
53  
54  
55  
56  
57  
58  
59  
60

---

City or municipality of birth Date of birth (optional: this helps us distinguish you from someone else with the same name)

For peer review only



SPIRIT 2013 Checklist: Recommended items to address in a clinical trial protocol and related documents\*

| Section/item                      | Item No | Description                                                                                                                                                                                                                                                                              | Pages |
|-----------------------------------|---------|------------------------------------------------------------------------------------------------------------------------------------------------------------------------------------------------------------------------------------------------------------------------------------------|-------|
| <b>Administrative information</b> |         |                                                                                                                                                                                                                                                                                          |       |
| Title                             | 1       | Descriptive title identifying the study design, population, interventions, and, if applicable, trial acronym                                                                                                                                                                             | 1     |
| Trial registration                | 2a      | Trial identifier and registry name. If not yet registered, name of intended registry                                                                                                                                                                                                     | 3     |
|                                   | 2b      | All items from the World Health Organization Trial Registration Data Set                                                                                                                                                                                                                 |       |
| Protocol version                  | 3       | Date and version identifier                                                                                                                                                                                                                                                              | NA    |
| Funding                           | 4       | Sources and types of financial, material, and other support                                                                                                                                                                                                                              | 18    |
| Roles and responsibilities        | 5a      | Names, affiliations, and roles of protocol contributors                                                                                                                                                                                                                                  | 1, 18 |
|                                   | 5b      | Name and contact information for the trial sponsor                                                                                                                                                                                                                                       |       |
|                                   | 5c      | Role of study sponsor and funders, if any, in study design; collection, management, analysis, and interpretation of data; writing of the report; and the decision to submit the report for publication, including whether they will have ultimate authority over any of these activities |       |
|                                   | 5d      | Composition, roles, and responsibilities of the coordinating centre, steering committee, endpoint adjudication committee, data management team, and other individuals or groups overseeing the trial, if applicable (see Item 21a for data monitoring committee)                         |       |
| <b>Introduction</b>               |         |                                                                                                                                                                                                                                                                                          |       |
| Background and rationale          | 6a      | Description of research question and justification for undertaking the trial, including summary of relevant studies (published and unpublished) examining benefits and harms for each intervention                                                                                       | 4-6   |
|                                   | 6b      | Explanation for choice of comparators                                                                                                                                                                                                                                                    |       |
| Objectives                        | 7       | Specific objectives or hypotheses                                                                                                                                                                                                                                                        | 5     |

|    |                                                           |     |                                                                                                                                                                                                                                                                                                                                                                                |       |
|----|-----------------------------------------------------------|-----|--------------------------------------------------------------------------------------------------------------------------------------------------------------------------------------------------------------------------------------------------------------------------------------------------------------------------------------------------------------------------------|-------|
| 1  |                                                           |     |                                                                                                                                                                                                                                                                                                                                                                                |       |
| 2  | Trial design                                              | 8   | Description of trial design including type of trial (eg, parallel group, crossover, factorial, single group), allocation ratio, and framework (eg, superiority, equivalence, noninferiority, exploratory)                                                                                                                                                                      | 9     |
| 3  |                                                           |     |                                                                                                                                                                                                                                                                                                                                                                                |       |
| 4  |                                                           |     |                                                                                                                                                                                                                                                                                                                                                                                |       |
| 5  |                                                           |     |                                                                                                                                                                                                                                                                                                                                                                                |       |
| 6  |                                                           |     |                                                                                                                                                                                                                                                                                                                                                                                |       |
| 7  |                                                           |     |                                                                                                                                                                                                                                                                                                                                                                                |       |
| 8  | <b>Methods: Participants, interventions, and outcomes</b> |     |                                                                                                                                                                                                                                                                                                                                                                                |       |
| 9  |                                                           |     |                                                                                                                                                                                                                                                                                                                                                                                |       |
| 10 | Study setting                                             | 9   | Description of study settings (eg, community clinic, academic hospital) and list of countries where data will be collected. Reference to where list of study sites can be obtained                                                                                                                                                                                             | 10    |
| 11 |                                                           |     |                                                                                                                                                                                                                                                                                                                                                                                |       |
| 12 |                                                           |     |                                                                                                                                                                                                                                                                                                                                                                                |       |
| 13 |                                                           |     |                                                                                                                                                                                                                                                                                                                                                                                |       |
| 14 |                                                           |     |                                                                                                                                                                                                                                                                                                                                                                                |       |
| 15 | Eligibility criteria                                      | 10  | Inclusion and exclusion criteria for participants. If applicable, eligibility criteria for study centres and individuals who will perform the interventions (eg, surgeons, psychotherapists)                                                                                                                                                                                   | 8-9   |
| 16 |                                                           |     |                                                                                                                                                                                                                                                                                                                                                                                |       |
| 17 |                                                           |     |                                                                                                                                                                                                                                                                                                                                                                                |       |
| 18 |                                                           |     |                                                                                                                                                                                                                                                                                                                                                                                |       |
| 19 |                                                           |     |                                                                                                                                                                                                                                                                                                                                                                                |       |
| 20 | Interventions                                             | 11a | Interventions for each group with sufficient detail to allow replication, including how and when they will be administered                                                                                                                                                                                                                                                     | 6-8   |
| 21 |                                                           |     |                                                                                                                                                                                                                                                                                                                                                                                |       |
| 22 |                                                           |     |                                                                                                                                                                                                                                                                                                                                                                                |       |
| 23 |                                                           |     |                                                                                                                                                                                                                                                                                                                                                                                |       |
| 24 |                                                           |     |                                                                                                                                                                                                                                                                                                                                                                                |       |
| 25 |                                                           | 11b | Criteria for discontinuing or modifying allocated interventions for a given trial participant (eg, drug dose change in response to harms, participant request, or improving/worsening disease)                                                                                                                                                                                 | 17    |
| 26 |                                                           |     |                                                                                                                                                                                                                                                                                                                                                                                |       |
| 27 |                                                           |     |                                                                                                                                                                                                                                                                                                                                                                                |       |
| 28 |                                                           |     |                                                                                                                                                                                                                                                                                                                                                                                |       |
| 29 |                                                           |     |                                                                                                                                                                                                                                                                                                                                                                                |       |
| 30 |                                                           | 11c | Strategies to improve adherence to intervention protocols, and any procedures for monitoring adherence (eg, drug tablet return, laboratory tests)                                                                                                                                                                                                                              | 10    |
| 31 |                                                           |     |                                                                                                                                                                                                                                                                                                                                                                                |       |
| 32 |                                                           |     |                                                                                                                                                                                                                                                                                                                                                                                |       |
| 33 |                                                           |     |                                                                                                                                                                                                                                                                                                                                                                                |       |
| 34 |                                                           |     |                                                                                                                                                                                                                                                                                                                                                                                |       |
| 35 |                                                           | 11d | Relevant concomitant care and interventions that are permitted or prohibited during the trial                                                                                                                                                                                                                                                                                  | 8     |
| 36 |                                                           |     |                                                                                                                                                                                                                                                                                                                                                                                |       |
| 37 |                                                           |     |                                                                                                                                                                                                                                                                                                                                                                                |       |
| 38 | Outcomes                                                  | 12  | Primary, secondary, and other outcomes, including the specific measurement variable (eg, systolic blood pressure), analysis metric (eg, change from baseline, final value, time to event), method of aggregation (eg, median, proportion), and time point for each outcome. Explanation of the clinical relevance of chosen efficacy and harm outcomes is strongly recommended | 11-13 |
| 39 |                                                           |     |                                                                                                                                                                                                                                                                                                                                                                                |       |
| 40 |                                                           |     |                                                                                                                                                                                                                                                                                                                                                                                |       |
| 41 |                                                           |     |                                                                                                                                                                                                                                                                                                                                                                                |       |
| 42 |                                                           |     |                                                                                                                                                                                                                                                                                                                                                                                |       |
| 43 |                                                           |     |                                                                                                                                                                                                                                                                                                                                                                                |       |
| 44 |                                                           |     |                                                                                                                                                                                                                                                                                                                                                                                |       |
| 45 |                                                           |     |                                                                                                                                                                                                                                                                                                                                                                                |       |
| 46 |                                                           |     |                                                                                                                                                                                                                                                                                                                                                                                |       |
| 47 | Participant timeline                                      | 13  | Time schedule of enrolment, interventions (including any run-ins and washouts), assessments, and visits for participants. A schematic diagram is highly recommended (see Figure)                                                                                                                                                                                               | 20    |
| 48 |                                                           |     |                                                                                                                                                                                                                                                                                                                                                                                |       |
| 49 |                                                           |     |                                                                                                                                                                                                                                                                                                                                                                                |       |
| 50 |                                                           |     |                                                                                                                                                                                                                                                                                                                                                                                |       |
| 51 |                                                           |     |                                                                                                                                                                                                                                                                                                                                                                                |       |
| 52 |                                                           |     |                                                                                                                                                                                                                                                                                                                                                                                |       |
| 53 | Sample size                                               | 14  | Estimated number of participants needed to achieve study objectives and how it was determined, including clinical and statistical assumptions supporting any sample size calculations                                                                                                                                                                                          | 15-16 |
| 54 |                                                           |     |                                                                                                                                                                                                                                                                                                                                                                                |       |
| 55 |                                                           |     |                                                                                                                                                                                                                                                                                                                                                                                |       |
| 56 |                                                           |     |                                                                                                                                                                                                                                                                                                                                                                                |       |
| 57 |                                                           |     |                                                                                                                                                                                                                                                                                                                                                                                |       |
| 58 |                                                           |     |                                                                                                                                                                                                                                                                                                                                                                                |       |
| 59 |                                                           |     |                                                                                                                                                                                                                                                                                                                                                                                |       |
| 60 |                                                           |     |                                                                                                                                                                                                                                                                                                                                                                                |       |



|    |                                                                     |     |                                                                                                                                                                                                                                                                                                                                                                                                              |              |
|----|---------------------------------------------------------------------|-----|--------------------------------------------------------------------------------------------------------------------------------------------------------------------------------------------------------------------------------------------------------------------------------------------------------------------------------------------------------------------------------------------------------------|--------------|
| 1  |                                                                     |     |                                                                                                                                                                                                                                                                                                                                                                                                              |              |
| 2  | Recruitment                                                         | 15  | Strategies for achieving adequate participant enrollment to reach target sample size                                                                                                                                                                                                                                                                                                                         | <b>9-10</b>  |
| 3  |                                                                     |     |                                                                                                                                                                                                                                                                                                                                                                                                              |              |
| 4  |                                                                     |     |                                                                                                                                                                                                                                                                                                                                                                                                              |              |
| 5  | <b>Methods: Assignment of interventions (for controlled trials)</b> |     |                                                                                                                                                                                                                                                                                                                                                                                                              |              |
| 6  |                                                                     |     |                                                                                                                                                                                                                                                                                                                                                                                                              |              |
| 7  | Allocation:                                                         |     |                                                                                                                                                                                                                                                                                                                                                                                                              | <b>9</b>     |
| 8  |                                                                     |     |                                                                                                                                                                                                                                                                                                                                                                                                              |              |
| 9  | Sequence generation                                                 | 16a | Method of generating the allocation sequence (eg, computer-generated random numbers), and list of any factors for stratification. To reduce predictability of a random sequence, details of any planned restriction (eg, blocking) should be provided in a separate document that is unavailable to those who enrol participants or assign interventions                                                     | <b>9</b>     |
| 10 |                                                                     |     |                                                                                                                                                                                                                                                                                                                                                                                                              |              |
| 11 |                                                                     |     |                                                                                                                                                                                                                                                                                                                                                                                                              |              |
| 12 |                                                                     |     |                                                                                                                                                                                                                                                                                                                                                                                                              |              |
| 13 |                                                                     |     |                                                                                                                                                                                                                                                                                                                                                                                                              |              |
| 14 |                                                                     |     |                                                                                                                                                                                                                                                                                                                                                                                                              |              |
| 15 |                                                                     |     |                                                                                                                                                                                                                                                                                                                                                                                                              |              |
| 16 |                                                                     |     |                                                                                                                                                                                                                                                                                                                                                                                                              |              |
| 17 |                                                                     |     |                                                                                                                                                                                                                                                                                                                                                                                                              |              |
| 18 | Allocation concealment mechanism                                    | 16b | Mechanism of implementing the allocation sequence (eg, central telephone; sequentially numbered, opaque, sealed envelopes), describing any steps to conceal the sequence until interventions are assigned                                                                                                                                                                                                    | <b>9</b>     |
| 19 |                                                                     |     |                                                                                                                                                                                                                                                                                                                                                                                                              |              |
| 20 |                                                                     |     |                                                                                                                                                                                                                                                                                                                                                                                                              |              |
| 21 |                                                                     |     |                                                                                                                                                                                                                                                                                                                                                                                                              |              |
| 22 |                                                                     |     |                                                                                                                                                                                                                                                                                                                                                                                                              |              |
| 23 |                                                                     |     |                                                                                                                                                                                                                                                                                                                                                                                                              |              |
| 24 | Implementation                                                      | 16c | Who will generate the allocation sequence, who will enrol participants, and who will assign participants to interventions                                                                                                                                                                                                                                                                                    | <b>9</b>     |
| 25 |                                                                     |     |                                                                                                                                                                                                                                                                                                                                                                                                              |              |
| 26 |                                                                     |     |                                                                                                                                                                                                                                                                                                                                                                                                              |              |
| 27 |                                                                     |     |                                                                                                                                                                                                                                                                                                                                                                                                              |              |
| 28 | Blinding (masking)                                                  | 17a | Who will be blinded after assignment to interventions (eg, trial participants, care providers, outcome assessors, data analysts), and how                                                                                                                                                                                                                                                                    | <b>10</b>    |
| 29 |                                                                     |     |                                                                                                                                                                                                                                                                                                                                                                                                              |              |
| 30 |                                                                     |     |                                                                                                                                                                                                                                                                                                                                                                                                              |              |
| 31 |                                                                     |     |                                                                                                                                                                                                                                                                                                                                                                                                              |              |
| 32 |                                                                     |     |                                                                                                                                                                                                                                                                                                                                                                                                              |              |
| 33 |                                                                     | 17b | If blinded, circumstances under which unblinding is permissible, and procedure for revealing a participant's allocated intervention during the trial                                                                                                                                                                                                                                                         | <b>NA</b>    |
| 34 |                                                                     |     |                                                                                                                                                                                                                                                                                                                                                                                                              |              |
| 35 |                                                                     |     |                                                                                                                                                                                                                                                                                                                                                                                                              |              |
| 36 |                                                                     |     |                                                                                                                                                                                                                                                                                                                                                                                                              |              |
| 37 | <b>Methods: Data collection, management, and analysis</b>           |     |                                                                                                                                                                                                                                                                                                                                                                                                              |              |
| 38 |                                                                     |     |                                                                                                                                                                                                                                                                                                                                                                                                              |              |
| 39 | Data collection methods                                             | 18a | Plans for assessment and collection of outcome, baseline, and other trial data, including any related processes to promote data quality (eg, duplicate measurements, training of assessors) and a description of study instruments (eg, questionnaires, laboratory tests) along with their reliability and validity, if known. Reference to where data collection forms can be found, if not in the protocol | <b>11-13</b> |
| 40 |                                                                     |     |                                                                                                                                                                                                                                                                                                                                                                                                              |              |
| 41 |                                                                     |     |                                                                                                                                                                                                                                                                                                                                                                                                              |              |
| 42 |                                                                     |     |                                                                                                                                                                                                                                                                                                                                                                                                              |              |
| 43 |                                                                     |     |                                                                                                                                                                                                                                                                                                                                                                                                              |              |
| 44 |                                                                     |     |                                                                                                                                                                                                                                                                                                                                                                                                              |              |
| 45 |                                                                     |     |                                                                                                                                                                                                                                                                                                                                                                                                              |              |
| 46 |                                                                     |     |                                                                                                                                                                                                                                                                                                                                                                                                              |              |
| 47 |                                                                     |     |                                                                                                                                                                                                                                                                                                                                                                                                              |              |
| 48 |                                                                     |     |                                                                                                                                                                                                                                                                                                                                                                                                              |              |
| 49 |                                                                     | 18b | Plans to promote participant retention and complete follow-up, including list of any outcome data to be collected for participants who discontinue or deviate from intervention protocols                                                                                                                                                                                                                    | <b>10</b>    |
| 50 |                                                                     |     |                                                                                                                                                                                                                                                                                                                                                                                                              |              |
| 51 |                                                                     |     |                                                                                                                                                                                                                                                                                                                                                                                                              |              |
| 52 |                                                                     |     |                                                                                                                                                                                                                                                                                                                                                                                                              |              |
| 53 |                                                                     |     |                                                                                                                                                                                                                                                                                                                                                                                                              |              |
| 54 | Data management                                                     | 19  | Plans for data entry, coding, security, and storage, including any related processes to promote data quality (eg, double data entry; range checks for data values). Reference to where details of data management procedures can be found, if not in the protocol                                                                                                                                            | <b>16</b>    |
| 55 |                                                                     |     |                                                                                                                                                                                                                                                                                                                                                                                                              |              |
| 56 |                                                                     |     |                                                                                                                                                                                                                                                                                                                                                                                                              |              |
| 57 |                                                                     |     |                                                                                                                                                                                                                                                                                                                                                                                                              |              |
| 58 |                                                                     |     |                                                                                                                                                                                                                                                                                                                                                                                                              |              |
| 59 |                                                                     |     |                                                                                                                                                                                                                                                                                                                                                                                                              |              |
| 60 |                                                                     |     |                                                                                                                                                                                                                                                                                                                                                                                                              |              |

|    |                                 |     |                                                                  |              |
|----|---------------------------------|-----|------------------------------------------------------------------|--------------|
| 1  |                                 |     |                                                                  |              |
| 2  | Statistical                     | 20a | Statistical methods for analysing primary and secondary          | <b>13-15</b> |
| 3  | methods                         |     | outcomes. Reference to where other details of the statistical    |              |
| 4  |                                 |     | analysis plan can be found, if not in the protocol               |              |
| 5  |                                 |     |                                                                  |              |
| 6  |                                 | 20b | Methods for any additional analyses (eg, subgroup and            | <b>13-15</b> |
| 7  |                                 |     | adjusted analyses)                                               |              |
| 8  |                                 |     |                                                                  |              |
| 9  |                                 | 20c | Definition of analysis population relating to protocol non-      | <b>13-15</b> |
| 10 |                                 |     | adherence (eg, as randomised analysis), and any statistical      |              |
| 11 |                                 |     | methods to handle missing data (eg, multiple imputation)         |              |
| 12 |                                 |     |                                                                  |              |
| 13 |                                 |     |                                                                  |              |
| 14 | <b>Methods: Monitoring</b>      |     |                                                                  |              |
| 15 |                                 |     |                                                                  |              |
| 16 | Data monitoring                 | 21a | Composition of data monitoring committee (DMC); summary          | <b>NA</b>    |
| 17 |                                 |     | of its role and reporting structure; statement of whether it is  |              |
| 18 |                                 |     | independent from the sponsor and competing interests; and        |              |
| 19 |                                 |     | reference to where further details about its charter can be      |              |
| 20 |                                 |     | found, if not in the protocol. Alternatively, an explanation of  |              |
| 21 |                                 |     | why a DMC is not needed                                          |              |
| 22 |                                 |     |                                                                  |              |
| 23 |                                 |     |                                                                  |              |
| 24 |                                 | 21b | Description of any interim analyses and stopping guidelines,     | <b>13</b>    |
| 25 |                                 |     | including who will have access to these interim results and      |              |
| 26 |                                 |     | make the final decision to terminate the trial                   |              |
| 27 |                                 |     |                                                                  |              |
| 28 | Harms                           | 22  | Plans for collecting, assessing, reporting, and managing         | <b>17</b>    |
| 29 |                                 |     | solicited and spontaneously reported adverse events and          |              |
| 30 |                                 |     | other unintended effects of trial interventions or trial conduct |              |
| 31 |                                 |     |                                                                  |              |
| 32 |                                 |     |                                                                  |              |
| 33 | Auditing                        | 23  | Frequency and procedures for auditing trial conduct, if any,     | <b>NA</b>    |
| 34 |                                 |     | and whether the process will be independent from                 |              |
| 35 |                                 |     | investigators and the sponsor                                    |              |
| 36 |                                 |     |                                                                  |              |
| 37 |                                 |     |                                                                  |              |
| 38 | <b>Ethics and dissemination</b> |     |                                                                  |              |
| 39 |                                 |     |                                                                  |              |
| 40 | Research ethics                 | 24  | Plans for seeking research ethics committee/institutional        | <b>16</b>    |
| 41 | approval                        |     | review board (REC/IRB) approval                                  |              |
| 42 |                                 |     |                                                                  |              |
| 43 | Protocol                        | 25  | Plans for communicating important protocol modifications         | <b>NA</b>    |
| 44 | amendments                      |     | (eg, changes to eligibility criteria, outcomes, analyses) to     |              |
| 45 |                                 |     | relevant parties (eg, investigators, REC/IRBs, trial             |              |
| 46 |                                 |     | participants, trial registries, journals, regulators)            |              |
| 47 |                                 |     |                                                                  |              |
| 48 | Consent or                      | 26a | Who will obtain informed consent or assent from potential        | <b>16</b>    |
| 49 | assent                          |     | trial participants or authorised surrogates, and how (see        |              |
| 50 |                                 |     | Item 32)                                                         |              |
| 51 |                                 |     |                                                                  |              |
| 52 |                                 |     |                                                                  |              |
| 53 |                                 | 26b | Additional consent provisions for collection and use of          | <b>NA</b>    |
| 54 |                                 |     | participant data and biological specimens in ancillary           |              |
| 55 |                                 |     | studies, if applicable                                           |              |
| 56 |                                 |     |                                                                  |              |
| 57 |                                 |     |                                                                  |              |
| 58 |                                 |     |                                                                  |              |
| 59 |                                 |     |                                                                  |              |
| 60 |                                 |     |                                                                  |              |

|    |                   |     |                                                                 |                |
|----|-------------------|-----|-----------------------------------------------------------------|----------------|
| 1  |                   |     |                                                                 |                |
| 2  | Confidentiality   | 27  | How personal information about potential and enrolled           | <b>16</b>      |
| 3  |                   |     | participants will be collected, shared, and maintained in       |                |
| 4  |                   |     | order to protect confidentiality before, during, and after the  |                |
| 5  |                   |     | trial                                                           |                |
| 6  |                   |     |                                                                 |                |
| 7  | Declaration of    | 28  | Financial and other competing interests for principal           | <b>18</b>      |
| 8  | interests         |     | investigators for the overall trial and each study site         |                |
| 9  |                   |     |                                                                 |                |
| 10 | Access to data    | 29  | Statement of who will have access to the final trial dataset,   | <b>17</b>      |
| 11 |                   |     | and disclosure of contractual agreements that limit such        |                |
| 12 |                   |     | access for investigators                                        |                |
| 13 |                   |     |                                                                 |                |
| 14 | Ancillary and     | 30  | Provisions, if any, for ancillary and post-trial care, and for  | <b>17</b>      |
| 15 | post-trial care   |     | compensation to those who suffer harm from trial                |                |
| 16 |                   |     | participation                                                   |                |
| 17 |                   |     |                                                                 |                |
| 18 | Dissemination     | 31a | Plans for investigators and sponsor to communicate trial        | <b>17</b>      |
| 19 | policy            |     | results to participants, healthcare professionals, the public,  |                |
| 20 |                   |     | and other relevant groups (eg, via publication, reporting in    |                |
| 21 |                   |     | results databases, or other data sharing arrangements),         |                |
| 22 |                   |     | including any publication restrictions                          |                |
| 23 |                   |     |                                                                 |                |
| 24 |                   | 31b | Authorship eligibility guidelines and any intended use of       | <b>NA</b>      |
| 25 |                   |     | professional writers                                            |                |
| 26 |                   |     |                                                                 |                |
| 27 |                   | 31c | Plans, if any, for granting public access to the full protocol, | <b>17</b>      |
| 28 |                   |     | participant-level dataset, and statistical code                 |                |
| 29 |                   |     |                                                                 |                |
| 30 |                   |     |                                                                 |                |
| 31 |                   |     |                                                                 |                |
| 32 |                   |     |                                                                 |                |
| 33 | <b>Appendices</b> |     |                                                                 |                |
| 34 |                   |     |                                                                 |                |
| 35 | Informed consent  | 32  | Model consent form and other related documentation given        | <b>attache</b> |
| 36 | materials         |     | to participants and authorised surrogates                       | <b>d</b>       |
| 37 |                   |     |                                                                 |                |
| 38 | Biological        | 33  | Plans for collection, laboratory evaluation, and storage of     | <b>NA</b>      |
| 39 | specimens         |     | biological specimens for genetic or molecular analysis in the   |                |
| 40 |                   |     | current trial and for future use in ancillary studies, if       |                |
| 41 |                   |     | applicable                                                      |                |
| 42 |                   |     |                                                                 |                |
| 43 |                   |     |                                                                 |                |

---

\*It is strongly recommended that this checklist be read in conjunction with the SPIRIT 2013 Explanation & Elaboration for important clarification on the items. Amendments to the protocol should be tracked and dated. The SPIRIT checklist is copyrighted by the SPIRIT Group under the Creative Commons "[Attribution-NonCommercial-NoDerivs 3.0 Unported](https://creativecommons.org/licenses/by-nc-nd/3.0/)" license.
